# Supplementary material for: Posttransplant Hyponatremia Predicts Graft Failure and Mortality in Kidney Transplantation Recipients: A Multicenter Cohort Study in Korea
Source: PLoS One. 2016 May 23;11(5):e0156050. doi: 10.1371/journal.pone.0156050 (PMC4877062; doi:10.1371/journal.pone.0156050)
Supplement: S1 Data — (XLS) [file pone.0156050.s001.xls]

## Sheet: Supporting Information file_dat
Order	Mort_dur	Mortality	GF_dur	GF	BPAR_dur	BPAR	gcNa_3_135	Na_3	cNa_3	AGE	SEX	Bwt	Smoking	HTN	DM	pCVD	LC	TBc	HBsAg	Anti_HCV	ESRD_origin2	pTPL	REL	HLA_match	DSA	ABOi	Induction	gCNI	gMetabolite	Thiazide	SSRI	Psychotic_drug	K_3	Cl_3	HCO3_3	Glu_3	Cr_3	eGFP_3M	LVEF	gcNa_0_135	gcNa_6_135
1	4664	0	3151	1	834	1	0	140	139.792	26	1	64	0	0	0	0	0	0	0	0	4	0	1	3	0	0	0	2	0	0	0	0	5.2	113	27	87	1	124.4		1
2	5336	0	5336	0	5336	0	0	139	140.088	38	2	58	0	1	0	0	0	0	0	0	4	0	1	0	0	0	0	1	1	0	0	0	5.2	109	26	168	1.3	48.8		0
3	4572	0	3901	1	4572	0	1	129	129.512	45	1	77.9	1	1	0	0	0	0	0	0	2	0	2	4	0	0	0	2	0	0	0	0	3.7	102	14	132	1.5	53.9		0
4	5154	0	764	1	5154	0	0	140	140.272	45	1	66.6	0	1	0	0	0	1	0	0	2	0	2	6	0	0	0	1	0	0	0	0	4.6	108	23	117	1.2			0
5	5126	0	5126	0	5126	0	0	139	138.712	24	2	58.3	0	1	0	0	0	0	0	0	3	0	1	2	0	0	0	2	0	0	0	0	4.2	111	21	82	1.9	45.4		0
6	5100	0	5100	0	5100	0	0	143	142.584	29	1	62	1	1	0	0	0	0	0	0	2	0	1	7	0	0	0	2	1	0	0	0	4	106	28	74	1.2	76.2		1
7	5110	0	5110	0	5110	0	0	144	143.744	25	2	44	0	1	0	0	0	0	0	0	2	0	1	3	0	0	0	2	0	0	0	0	3.7	107	25	84	1	71.9		0	0
8	5090	0	5111	0	5111	0	0	139	139.88	27	1	56	0	1	0	0	0	0	0	0	2	1	3	3	0	0	1	1	1	0	0	0	4.9	111	15	155	2.1
9	5048	0	5048	0	5048	0	0	139	139.16	22	1	76	0	1	0	0	0	0	0	0	3	0	1	3	0	0	0	2	1	0	0	0	4.4	104	23	110	1.2	80.6		1
10	5012	0	5012	0	3665	1	0	139	139.224	43	1	37.6	1	1	0	0	0	0	0	0	4	0	1	2	0	0	0	1	1	0	0	0	4.8	103	22	114	1.2	70.3		0
11	4963	0	4963	0	92	1	0	141	140.952	54	1	62	0	1	1	0	0	0	0	1	1	0	2	5	0	0	1	1	1	0	0	0	4.4	113	20	97	1.8	42.1		0
12	3947	0	3947	0	3947	0	0	137	137.016	56	1	66	0	1	0	0	0	0	0	0	4	0	2	5	0	0	0	2	1	0	0	0	4.6	110	18	101	1.8	47.8		0
13	4949	0	4949	0	10	1	0	144	143.632	22	1	60.5	0	1	0	0	0	0	0	0	2	0	1	2	0	0	0	1	1	0	0	0	3.8	103	19	77	1.4	67.5		0	0
14	4417	0	3284	1	4417	0	0	137	137.112	20	1	61.7	0	1	0	0	0	0	0	0	2	0	1	2	0	0	0	2	1	0	0	0	4.2	108	20	107	1.6			0	0
15	4635	0	4635	0	4635	0	0	144	143.488	48	1	56.4	0	1	0	0	0	0	0	0	3	0	1	0	0	0	0	1	1	0	0	0	3.8	108	26	68	1.5	46		0	0
16	4653	0	4438	1	2941	1	0	138	139.504	39	1	62.3	1	1	0	0	0	0	0	1	2	0	2	3	0	0	0	1	1	0	0	0	4.3	109	22	194	0.9	100		0	0
17	4632	0	4632	0	2883	1	0	142	141.952	43	1	52.2	0	1	0	0	0	0	0	0	2	0	3	2	0	0	1	2	1	0	0	0	4.7	109	28	97	1.2	70.3		0	0
18	4614	0	4614	0	4614	0	0	139	138.76	54	2	46.7	0	0	0	0	0	0	0	0	3	0	2	2	0	0	0	2	1	0	0	0	4.2	106	24	85	0.8	79.6		0
19	4524	0	1092	1	722	1	0	137	139.128	45	2	57.8	0	1	1	1	0	0	0	0	1	0	1	3	0	0	0	1	1	0	0	0	3.5	95	30	233	1.2	51.7		1	0
20	4187	0	581	1	567	1	0	139	141.896	45	1	56.4	0	1	0	0	0	0	0	0	3	0	1	3	0	0	0	2	1	0	0	0	4.3	108	22	281	1.2	69.7		0	0
21	4486	0	953	1	726	1	0	141	141.112	46	1	67.8	0	1	1	0	0	0	0	0	1	0	3	5	0	0	1	1	1	0	0	0	4.9	109	25	107	1.3	63.3		0
22	4329	0	4329	0	4329	0	0	138	139.264	47	2	52	0	1	1	1	0	0	0	0	1	0	2	3	0	0	1	1	1	0	0	0	4.3	104	25	179	1.2	63.3		0	0
23	4394	0	884	1	15	1	0	142	141.824	34	2	45.5	0	1	0	0	0	0	0	0	2	0	1	3	0	0	0	2	0	0	0	0	3.7	106	26	89	1.4	45.8		0	1
24	4393	0	4393	0	4393	0	0	139	139.704	46	1	54	0	1	0	0	0	1	0	0	2	0	3	3	0	0	1	2	1	0	0	0	4.2	106	19	144	1.7	46.4		1	0
25	4369	0	4369	0	4369	0	0	142	142.144	54	1	61.7	0	1	1	0	0	1	0	0	1	0	2	3	0	0	1	1	1	0	0	0	5.2	111	28	109	1	82.9		1	0
26	3739	1	3739	0	3739	0	1	128	129.12	69	1	67.8	0	1	0	0	0	0	1	0	4	0	3	2	0	0	1	1	1	0	0	0	4.5	97	21	170	1.4	45.9		0	0
27	4185	0	4185	0	4185	0	0	145	144.856	40	1	68.8	0	1	0	0	0	0	0	0	2	0	1	3	0	0	0	1	1	0	0	0	4.1	102	30	91	1.7	47.8		0
28	4146	0	4146	0	4146	0	0	142	144.288	57	1	69.2	1	1	1	0	0	0	0	0	1	0	3	0	0	0	1	1	1	0	0	0	4.9	104	27	243	1.5	44.4		0
29	4171	0	4171	0	128	1	0	139	138.952	32	2	58.5	0	1	0	0	0	0	0	0	2	0	2	4	0	0	0	2	1	0	0	0	4.4	108	22	97	1.3	42.8		0	0
30	1406	1	1406	1	1406	0	1	133	133.048	67	1	62.1	0	1	0	0	0	0	0	0	3	0	3	3	0	0	1	2	1	0	0	0	5	104	21	103	1.9	43		0
31	2451	0	2451	0	2451	0	0	144	144.784	38	1	72	0	1	0	0	0	0	0	0	3	0	2	6	0	0	1	1	1	0	0	0	4.2	103	31	149	1.3	65.8	60	0	0
32	3580	0	3580	0	3580	0	0	141	141.064	34	2	48.8	0	1	0	0	0	0	0	0	4	0	2	6	0	0	1	2	1	0	0	0	3.9	113	22	104	1	67.6	62	0	0
33	3984	0	3984	0	3984	0	0	143	142.84	66	1	65.8	0	1	0	0	0	0	0	0	4	0	3	3	0	0	1	1	1	0	0	0	4.2	108	24	90	1.4	58.8			0
34	3912	0	3912	0	50	1	0	138	137.952	38	1	54	0	1	0	0	0	0	0	0	4	0	1	3	0	0	0	1	1	0	0	0	4.1	109	24	97	1.6	48.3	70	0	0
35	3941	0	3941	0	3941	0	0	145	144.84	51	2	48	0	1	0	0	0	0	0	0	4	0	3	5	0	0	1	2	1	0	0	0	5.2	110	24	90	1.1	55.7
36	3844	0	3844	0	10	1	0	140	141.248	59	1	73.7	0	1	1	0	0	0	0	0	1	0	1	2	0	0	0	1	1	0	0	0	4.5	109	20	178	1.4	44.1	64	0	0
37	3788	0	3788	0	9	1	0	142	141.712	42	2	48.8	0	1	0	0	0	0	0	0	4	0	1	4	0	0	0	1	1	0	0	0	4.4	106	29	82	1.1	52.4	56	0
38	3829	0	1734	1	700	1	0	139	138.952	23	2	49.7	0	1	0	0	0	0	0	0	2	0	1	0	0	0	0	1	1	0	0	0	3.9	108	26	97	1	73.1	35	0	0
39	3753	0	3753	0	3753	0	0	143	143.016	55	1	64	0	1	0	0	0	0	0	0	3	0	1	7	0	0	0	1	1	0	0	0	4.1	104	27	101	1.4	56	52	1
40	3767	0	3767	0	3767	0	0	142	142.256	28	1	63.4	0	1	0	0	0	0	0	0	2	0	1	3	0	0	0	1	1	0	0	0	4	104	27	116	1.8	55.1		0
41	3737	0	3737	0	3295	1	0	142	141.968	31	1	74.7	1	1	0	0	0	0	0	0	4	0	2	4	0	0	0	2	1	0	0	0	4.3	110	24	98	1.5	58.1	66	0	0
42	3773	0	3773	0	3773	0	0	131	136.76	52	1	76.6	1	1	1	1	0	0	0	0	1	0	1	2	0	0	0	1	1	0	0	0	5.9	104	20	460	2	42.4	60	0	0
43	3738	0	3738	0	3738	0	0	143	143.256	68	1	55	1	1	1	1	0	0	0	0	1	0	2	4	0	0	1	1	1	0	0	0	4.2	106	28	116	1	70.9		0	0
44	3731	0	3731	0	3731	0	0	144	144.128	41	1	61.8	0	1	0	0	0	0	0	0	4	0	2	4	0	0	0	2	1	0	0	0	4	108	28	108	1.2	59.5	62	0	0
45	2548	0	2548	0	2548	0	0	140	142.72	56	1	80.4	1	1	1	1	0	0	0	0	1	0	2	5	0	0	1	1	1	0	1	0	4.2	104	30	270	1.5	60.8	75	0	0
46	3702	0	3702	0	3702	0	0	139	138.616	26	2	46.6	0	1	0	0	0	0	0	0	3	0	1	0	0	0	0	2	1	0	0	0	3.7	102	27	76	0.9	80.6	57.5	0	0
47	3655	0	3655	0	1	1	0	138	137.728	34	2	50.9	0	1	0	0	0	1	0	0	2	1	1	2	0	0	0	2	1	0	0	0	4.3	104	26	83	1			0	0
48	3679	0	2286	1	3679	0	0	142	141.872	39	2	53.5	0	1	0	0	0	0	0	0	4	0	3	5	0	0	1	2	1	0	0	0	4.6	107	24	92	2.4	23.9		0	0
49	1922	1	1922	0	12	1	0	145	144.792	56	2	54.6	0	1	0	0	0	0	0	0	4	0	1	3	0	0	0	1	1	0	0	0	4.4	109	26	87	1.2	49.5		0	0
50	3627	0	3627	0	3627	0	0	142	141.92	40	1	75.3	1	1	0	0	0	0	0	0	2	0	1	1	0	0	0	1	1	0	0	0	4.8	108	24	95	1.8	47.8	69	0	0
51	3618	0	3618	0	3618	0	0	141	141.048	59	1	67	0	1	0	0	0	1	0	0	3	0	2	5	0	0	1	2	1	0	0	0	3.6	106	26	103	1.6	51	60	0	0
52	3576	0	3576	0	3576	0	0	140	140.112	38	1	68	0	1	0	0	0	0	0	0	3	0	1	3	0	0	0	1	1	0	0	0	4.3	102	29	107	1.5	55.8	69	0	0
53	3534	0	3534	0	3534	0	0	142	141.616	58	2	43.3	0	1	1	0	0	0	0	0	1	0	1	2	0	0	0	1	1	0	0	0	4.3	106	29	76	1	60.6	63	0
54	3526	0	3526	0	30	1	0	143	144.632	44	1	71	0	1	0	0	0	0	0	0	4	0	2	5	0	0	0	1	1	0	0	0	4.3	108	26	202	1.7	46.8	56	0	0
55	3485	0	3485	0	3485	0	0	141	140.648	50	1	81.9	0	1	0	1	0	0	0	0	4	0	1	2	0	0	0	2	1	0	0	0	4.2	107	27	78	1.3	62.2	67	0	0
56	2219	0	2219	0	2219	0	0	138	138.08	30	1	56.4	0	0	0	0	0	0	1	0	4	0	3	6	0	0	1	2	1	0	0	0	4.5	108	20	105	1.3	75.7	63		0
57	3470	0	3470	0	3470	0	0	139	138.824	39	1	51	0	1	0	0	0	0	0	0	2	0	1	0	0	0	0	2	1	0	0	0	4	99	33	89	1.3	65.4	63	0
58	3489	0	3489	0	3489	0	0	143	142.984	27	1	74	0	0	0	0	0	0	0	0	2	0	1	3	0	0	0	1	1	0	0	0	3.8	107	23	99	1.8	51.7	59		0
59	3429	0	3429	0	2021	1	0	140	140.048	48	1	74	1	1	0	0	0	0	0	0	3	0	1	3	0	0	0	2	1	0	0	0	4.1	104	28	103	1.5	53.2	68	1	0
60	3478	0	3478	0	3478	0	0	139	138.76	50	2	65	0	1	0	0	0	0	0	0	3	0	1	3	0	0	0	1	1	0	0	0	4.1	106	24	85	1.1	56	63	0	1
61	3464	0	3464	0	1637	1	0	136	135.888	37	1	55.7	0	1	1	0	0	0	0	0	3	0	1	3	0	0	0	1	1	0	0	0	4.7	103	26	93	1.3	66.1	59	0	0
62	3289	0	3289	0	57	1	0	139	139.16	36	1	80.4	0	1	0	0	0	0	0	0	3	0	1	6	0	0	1	2	1	0	0	0	4.4	110	21	110	1.4	56.4	51	0
63	3437	0	3437	0	3437	0	0	136	135.936	45	2	57.8	0	1	0	0	0	0	0	0	3	0	1	1	0	0	0	1	1	0	0	0	5.2	104	26	96	1.3	47.2	61	0	0
64	3401	0	3401	0	3401	0	0	141	141.192	48	1	66.2	0	1	0	0	0	0	0	0	4	0	1	1	0	0	0	1	1	0	0	0	4.5	107	26	112	1.5	57.6	67	0	0
65	3395	0	3395	0	10	1	0	144	143.936	57	2	69.1	0	1	0	0	0	0	0	0	4	0	3	4	0	0	1	1	1	0	0	0	4.2	109	25	96	1.4	41.3	56
66	3331	0	3331	0	3331	0	0	140	140.464	56	1	68.3	0	1	1	0	0	0	0	0	1	0	1	1	0	0	0	1	1	0	1	0	5.2	108	25	129	1.2	66.7	53	1	0
67	1609	0	1253	1	5	1	0	140	139.952	32	1	52.8	0	1	0	0	0	0	1	0	4	0	1	1	0	0	0	2	1	0	0	0	5.1	111	20	97	1.4	62.5	56	0	0
68	3261	0	3261	0	3261	0	0	141	140.728	49	2	52.7	0	1	0	0	0	0	0	0	3	0	1	3	0	0	0	1	1	1	0	0	4.2	105	29	83	1.1	56.2	66	0	0
69	3256	0	3256	0	3256	0	0	141	140.728	52	2	60.6	0	1	0	0	0	1	0	0	3	0	2	3	0	0	0	1	1	0	0	0	4.2	106	24	83	1.5	38.8	55	0	0
70	3303	0	3303	0	3303	0	0	136	136.016	50	1	63.1	0	1	0	0	0	0	0	0	3	0	2	4	0	0	0	1	1	0	0	0	4.5	102	25	101	1.2	68.2	58	0	0
71	3323	0	3323	0	3323	0	0	141	140.952	56	2	59	0	1	0	0	0	0	0	0	3	0	2	3	0	0	0	1	1	0	0	0	4.2	105	28	97	1.2	49.5	60	0	0
72	3281	0	3281	0	3281	0	0	141	140.952	40	1	63.6	0	1	0	0	0	0	0	0	2	0	2	5	0	0	1	1	1	0	0	0	4.2	105	32	97	1.4	59.8	63	0	0
73	3298	0	3298	0	14	1	0	137	136.824	27	1	83.1	1	1	0	0	0	0	0	0	3	0	1	3	0	0	0	1	1	0	0	0	4.6	105	24	89	1.4	64.7	53	0	0
74	3304	0	3304	0	3304	0	0	141	140.824	63	2	58.9	0	1	0	0	0	0	0	0	2	0	1	3	0	0	0	1	1	0	0	0	4.2	108	26	89	1.1	53.4	63	1	0
75	3270	0	1262	1	1262	0	0	145	144.776	24	1	49.6	0	1	0	0	0	0	0	0	2	1	1	1	0	0	1	2	0	0	0	0	4.8	116	19	86	1.7		58	0	0
76	3284	0	3284	0	41	1	0	141	140.808	24	1	68	0	1	0	0	0	0	0	0	2	0	1	4	0	0	1	1	1	0	0	0	4.6	102	28	88	1.8	49.6	65	0	0
77	3249	0	3249	0	3249	0	0	136	138.704	59	2	57.8	0	1	1	1	0	0	0	0	1	0	2	5	0	0	1	1	1	0	0	0	5.3	105	21	269	1.2	49	58	0	0
78	3205	0	3205	0	8	1	0	135	135.016	47	1	77.2	0	1	0	0	0	0	0	0	3	0	1	3	0	0	0	1	1	0	0	0	4.6	103	22	101	1.7	46.2	57	0	0
79	3203	0	3203	0	3203	0	0	141	140.728	23	1	49	0	0	0	0	0	1	0	0	3	0	3	4	0	0	1	2	1	0	0	0	4.8	107	24	83	1.2	88.3	54	0	0
80	3247	0	3247	0	3247	0	1	134	134.56	27	2	36.2	0	0	0	0	0	0	0	0	3	0	3	1	0	0	1	2	1	0	0	0	4.8	102	26	135	0.8	91.6		0	0
81	3228	0	3228	0	3228	0	0	140	139.952	60	1	55	0	1	0	0	0	0	0	0	4	0	1	3	0	0	0	1	1	1	0	0	4.6	104	25	97	1.2	65.7	22.5	0	0
82	3212	0	3212	0	3212	0	0	136	136.064	51	2	49.6	0	1	0	0	0	0	0	0	3	0	2	5	0	0	1	1	1	0	0	0	4.4	99	26	104	1.4	50.4	65	0	0
83	3228	0	3228	0	3228	0	0	141	140.952	48	2	50.4	0	1	0	0	0	0	0	0	3	0	1	2	0	0	0	1	1	0	0	0	4.7	107	25	97	1.3	46.5	65	0	0
84	3233	0	3233	0	3233	0	0	138	137.68	21	2	48.7	0	1	0	0	0	0	0	0	3	0	1	2	0	0	0	1	1	0	0	0	3.7	101	30	80	1.2	66.7		0	0
85	3221	0	3221	0	3221	0	0	142	142.048	52	1	91.1	1	1	1	0	0	0	0	0	1	0	1	0	0	0	0	1	1	0	0	0	4.6	111	28	103	1.4	56.7	57	0	0
86	3221	0	3221	0	2968	1	0	140	139.968	28	1	68.8	0	1	0	0	0	0	0	0	2	0	2	6	0	0	1	1	1	0	0	0	4.4	108	26	98	1.2	76.7	64	0	0
87	291	1	291	1	291	0	1	133	134.92	63	1	72.7	0	1	1	1	0	0	0	0	1	0	1	4	0	0	0	1	1	0	0	0	4.9	105	23	220	1.6	46.7	39	0	0
88	3118	0	3118	0	3118	0	0	141	140.568	43	2	44.5	0	1	0	0	0	0	0	0	4	0	1	2	0	0	0	1	1	0	0	0	4.1	102	27	73	1.3	47.6	52	0
89	3149	0	3149	0	3149	0	0	140	140.064	44	1	52.5	0	0	0	0	0	0	0	0	2	0	1	2	0	0	0	1	1	0	0	0	4.6	108	23	104	1.3	63.8	56	0
90	3074	0	3074	0	3074	0	0	140	139.808	20	1	57.8	0	0	0	0	0	0	0	0	4	0	1	2	0	0	0	1	1	0	0	0	4.9	109	24	88	1.2	82.2	65	0
91	3132	0	3132	0	3132	0	0	140	139.792	22	1	58.6	0	0	0	0	0	0	0	0	2	0	2	5	0	0	0	1	1	0	0	0	4.6	103	28	87	1.3	73.5	60		0
92	3149	0	3149	0	3149	0	0	140	140.784	47	1	73.9	0	1	1	0	0	0	0	0	1	0	1	2	0	0	0	1	1	0	0	0	5	108	22	149	1.4	57.8	60	0	0
93	3073	0	3073	0	44	1	0	140	140.672	52	1	59	0	1	0	0	0	0	0	0	3	0	1	2	0	0	0	1	1	0	0	0	4.6	107	23	142	1.1	52.3	53	0	0
94	3107	0	3107	0	3107	0	0	140	139.936	45	2	51.4	0	1	0	0	0	0	0	0	2	0	1	3	0	0	0	2	1	0	0	0	4.2	103	27	96	1.1	57.2	66	0	0
95	3093	0	3093	0	3093	0	0	139	139.464	30	1	64.8	0	1	0	0	0	0	1	0	4	0	1	3	0	0	0	2	1	0	0	0	4.5	105	26	129	1.2	75.7	64	1	0
96	3107	0	3107	0	3107	0	0	140	139.904	20	1	52.5	0	1	0	0	0	0	0	0	3	0	1	2	0	0	0	2	1	0	0	0	4.2	106	26	94	1.4	68.8	61	0	0
97	3100	0	3100	0	3100	0	0	140	141.888	44	1	70.2	0	1	1	1	0	1	0	0	1	0	1	2	0	0	0	2	1	0	0	0	5	107	24	218	1.2	70	56	0	0
98	3051	0	3051	0	3051	0	0	139	138.808	30	1	64	1	1	0	0	0	0	1	0	3	0	1	3	0	0	0	2	1	0	0	0	4.7	100	27	88	1.3	75.7	54	0
99	3009	0	3009	0	3009	0	0	142	142.032	60	1	64.3	1	1	0	1	0	0	0	0	3	0	1	3	0	0	0	2	1	0	0	0	4.3	110	20	102	1.4	55	61	0	0
100	3023	0	3023	0	3023	0	0	141	140.808	46	1	69	0	1	0	0	0	0	0	0	3	0	1	3	0	0	0	2	1	0	0	0	4.2	103	27	88	1.6	49.8	63	0	0
101	2992	0	2992	0	2992	0	0	142	142.048	51	1	74	0	1	0	0	0	0	0	0	2	0	3	5	0	0	1	2	1	0	0	0	4.9	105	27	103	1.7	45.5	45	0	0
102	2964	0	2964	0	2964	0	0	142	141.936	51	2	69	0	1	0	0	0	0	0	0	3	0	1	2	0	0	0	2	1	0	0	0	4.6	104	30	96	1.2	50.4	57	0	0
103	2990	0	2990	0	2990	0	0	140	139.904	49	1	63.5	1	1	0	1	0	0	0	0	3	0	2	6	0	0	1	2	1	0	0	0	4.3	101	30	94	1.3	62.5	67	0	0
104	3016	0	3016	0	21	1	0	142	141.872	47	2	53	0	1	1	0	0	0	0	0	2	0	1	3	0	0	0	1	1	0	0	0	4	105	28	92	1.1	63.3	66	0
105	2959	0	2959	0	1801	1	0	140	139.808	35	1	59	1	1	0	0	0	0	0	0	3	0	2	4	0	0	0	2	1	0	0	0	4	105	26	88	1.2	73.3	56	0	0
106	3025	0	3025	0	3025	0	0	139	138.744	25	2	52.3	0	1	0	0	0	0	0	0	3	0	1	3	0	0	0	2	1	0	0	0	5	104	26	84	1	71.9	65	0
107	529	0	529	0	10	1	0	140	139.792	22	1	77.4	1	1	0	0	0	0	0	0	2	0	3	3	0	0	1	2	1	0	0	0	4.8	115	17	87	2.3	38			0
108	853	0	853	0	853	0	0	139	139.096	24	1	72.9	0	1	0	0	0	0	0	0	2	0	1	3	0	0	1	2	1	0	0	0	4	107	23	106	1.5	61.2	64	0	0
109	2961	0	2961	0	2961	0	0	143	142.728	57	1	61.8	0	1	0	0	0	1	0	0	2	0	3	4	0	0	1	2	1	0	0	0	4.4	105	32	83	1.2	66.4			0
110	2904	0	2904	0	2904	0	0	142	141.888	30	1	68.4	0	1	0	0	0	0	0	0	2	1	1	4	0	0	1	2	1	0	0	0	3.9	108	23	93	1.2		56	0	0
111	2467	1	2467	0	2467	0	0	141	140.76	49	1	66.4	1	1	0	0	0	0	0	0	3	0	2	6	0	0	0	2	1	0	0	0	4.6	105	22	85	1.2	68.5	63	0	0
112	2854	0	2854	0	2854	0	0	139	139.672	48	2	52.8	0	1	1	0	0	0	0	0	1	0	1	1	0	0	1	2	1	0	0	0	5.1	105	29	142	1.2	51	61	0	0
113	2913	0	2913	0	8	1	0	139	139.272	59	1	59.1	0	1	0	0	0	0	0	0	2	1	3	5	0	0	1	2	1	0	0	0	4.3	108	22	117	1.3		33	0	0
114	2852	0	2852	0	30	1	0	139	138.952	65	1	73.7	1	1	1	0	0	0	0	0	1	0	1	3	0	0	0	2	1	0	0	0	4.9	108	22	97	2.1	33.9	70	0	0
115	149	1	149	0	149	0	0	135	135.672	55	2	51.6	0	1	0	0	0	0	0	0	2	0	3	4	0	0	1	2	1	0	0	0	4.3	99	22	142	0.9	79.3		0	0
116	2743	0	2743	0	19	1	0	138	137.744	30	1	56.2	1	1	0	0	0	0	0	0	3	0	1	2	0	0	0	2	1	0	0	0	4.1	106	24	84	2.1	39.7	54	0	0
117	2821	0	2821	0	2821	0	0	143	142.792	48	2	47.6	0	1	0	0	0	0	0	0	3	0	1	2	0	0	0	2	1	0	0	0	3.9	105	29	87	1	63	46	0	0
118	2813	0	1927	1	1723	1	0	141	140.728	39	2	57.2	0	0	0	0	0	0	0	0	4	0	2	4	0	0	1	2	1	0	0	0	4.3	109	25	83	1.1	58.9	67	0	0
119	2800	0	2800	0	2800	0	0	141	141.72	52	2	49.7	0	1	0	0	0	1	0	0	3	0	2	6	0	0	0	2	1	0	0	0	4.2	108	21	145	1.2	50.2	60	0	0
120	2785	0	2785	0	2785	0	0	142	142.064	40	1	63.8	0	1	0	0	0	0	0	0	4	0	3	4	0	0	1	2	1	0	0	0	4.3	111	21	104	1	99.5	67		0
121	2731	0	2731	0	2731	0	0	141	140.984	50	1	82.6	1	1	0	0	0	0	0	0	3	0	2	4	0	0	1	2	1	0	0	0	4.2	112	23	99	1.6	49	56	0	0
122	2718	0	2718	0	10	1	0	141	141.016	47	1	68	1	0	0	0	0	1	0	0	4	0	3	5	0	0	1	2	1	0	0	0	5	109	25	101	2	40.7	59	0	0
123	2753	0	2753	0	2753	0	0	141	141.256	43	2	57.5	0	1	0	0	0	0	0	0	3	0	3	2	0	0	1	1	0	0	0	0	5	106	24	116	1	64.4		0	0
124	2757	0	2757	0	2757	0	0	142	141.744	42	2	49.3	0	1	0	0	0	0	0	0	4	0	2	3	0	0	1	2	1	0	0	0	4.8	111	21	84	1.3	47.8	65	0
125	2701	0	2701	0	2701	0	0	143	142.664	41	2	46.2	0	1	0	0	0	0	0	0	4	0	1	3	0	0	1	1	1	0	0	0	4.3	108	27	79	1	65	65	0
126	2666	0	2666	0	2666	0	0	142	141.936	36	1	69.7	0	1	0	0	0	0	0	0	3	0	1	1	0	0	1	1	0	0	0	0	4.4	103	26	96	1.5	52.3	66	0	0
127	2617	0	2617	0	2617	0	0	143	142.728	51	1	54.9	0	1	0	0	0	0	0	0	3	0	1	1	0	0	1	2	1	0	0	1	4.2	110	27	83	1.1	75.1	54	0	0
128	2605	0	2605	0	9	1	0	143	142.776	53	1	64.8	0	1	0	0	0	0	0	0	4	0	2	5	0	0	0	2	1	0	0	0	4.7	110	23	86	1.6	48.4	60	0
129	2582	0	2582	0	2582	0	0	141	141.448	46	1	69.9	1	1	0	0	0	0	0	0	2	0	2	5	0	0	0	2	1	0	0	0	4.1	105	26	128	1.5	53.6	54	0	0
130	2589	0	2589	0	2589	0	0	141	140.728	44	1	58.7	0	1	0	0	0	0	0	0	3	0	2	4	0	0	1	2	1	0	0	0	4.3	109	23	83	1.2	63.8	63	0	0
131	2542	0	2542	0	2542	0	0	145	144.872	51	2	59.9	0	1	0	0	0	0	0	0	4	1	2	4	1	0	1	2	1	0	0	0	4.5	111	26	92	1.2		55	0	0
132	202	1	202	0	202	0	0	141	142.456	50	1	54.3	0	1	1	0	0	0	0	0	1	0	1	0	0	0	0	1	0	0	0	0	5.3	109	22	191	1.7	45.6	56	0	0
133	2529	0	2529	0	185	1	0	141	140.536	51	2	50	0	1	0	0	0	0	0	0	4	0	3	2	0	0	1	2	1	0	0	0	5.3	118	16	71	1	62.2			0
134	2547	0	2547	0	2547	0	0	141	141.032	46	1	60.2	0	1	0	0	0	0	0	0	2	0	1	1	0	0	0	1	0	0	0	0	4.3	108	26	102	1.3	63.3	65	0	0
135	2563	0	2563	0	2563	0	0	135	136.504	67	1	61.8	0	1	1	1	0	0	0	0	1	0	2	3	0	0	1	1	1	0	0	0	4.7	102	26	194	1.2	64.3	49	1	0
136	2540	0	2540	0	84	1	0	144	144.528	42	1	49	1	1	0	0	0	0	0	0	4	0	3	5	0	0	1	1	1	0	0	0	4	110	23	133	2.1	50.7	60		0
137	2526	0	2526	0	2526	0	0	143	142.92	37	2	60.5	0	0	0	0	0	0	0	0	2	0	2	4	1	0	1	2	1	0	0	0	4.6	110	21	95	1.2	59.5	58	0
138	2491	0	2491	0	2491	0	0	143	142.872	35	2	60.9	0	1	0	0	0	0	0	0	2	0	2	3	0	0	1	2	1	0	0	0	5	109	26	92	1	67.2	63	0
139	2505	0	2505	0	8	1	0	142	142.192	44	1	65.3	0	1	0	0	0	0	0	0	2	0	2	5	0	0	1	2	1	0	0	0	4.7	105	23	112	1.5	50.2	59	0	0
140	2487	0	2487	0	6	1	0	141	140.712	67	2	43.5	0	0	0	0	0	0	0	0	3	0	3	4	0	0	1	2	1	0	0	0	4.5	106	27	82	1	58.9	53		0
141	2503	0	2503	0	5	1	0	141	140.904	41	2	52.5	0	1	0	0	0	0	0	0	4	0	3	5	1	0	1	2	1	0	0	0	4.2	112	21	94	1.4	40.7	57		0
142	2409	0	2409	0	13	1	0	139	138.984	40	2	46.7	0	1	0	1	0	0	0	0	4	0	2	4	1	0	0	2	1	0	0	1	4.3	106	29	99	0.9	73.8	58	1
143	2498	0	2498	0	13	1	0	138	137.968	47	2	61.1	0	0	0	0	0	0	0	0	4	0	1	3	0	0	1	2	1	1	0	0	5.3	109	20	98	1.1	56.7	57	0
144	2477	0	2477	0	2562	0	0	141	140.68	30	1	50.2	0	1	0	0	0	0	0	0	4	1	1	2	1	0	1	2	1	0	0	0	4.9	106	23	80	1.3		63	0	0
145	2468	0	2468	0	2468	0	0	135	136.968	60	1	65	1	1	0	0	0	0	0	0	3	0	3	4	0	0	1	2	1	0	0	0	5.2	105	15	223	1.6	59.9	60		0
146	2426	0	2426	0	2426	0	0	145	144.632	52	2	48.2	0	1	0	0	0	1	0	0	2	0	3	5	0	0	1	2	1	0	0	0	4.3	112	25	77	1.3	45.8	55	0
147	2402	0	2402	0	2402	0	0	143	143.384	48	2	47	0	1	0	0	0	0	0	0	4	0	1	2	0	0	0	2	1	0	0	0	4.3	106	26	124	0.9	71.1	53	0
148	1891	1	1891	0	1891	0	0	141	140.776	51	1	60.3	0	1	0	0	0	0	1	0	3	0	3	3	0	0	1	2	1	0	0	0	4.6	107	26	86	1.1	75.1	60
149	583	0	583	0	583	0	0	145	144.792	34	1	68.4	0	1	0	0	0	1	0	0	2	0	3	2	0	0	1	2	1	0	0	0	4.6	110	22	87	1.3	61.8	61
150	2171	0	2171	0	2171	0	0	141	140.84	32	2	32.5	0	1	0	0	0	0	0	0	3	0	3	0	0	0	1	2	1	0	0	0	4.2	107	24	90	0.6	123.3
151	2310	0	2310	0	2310	0	0	139	138.968	43	1	55	0	1	0	0	0	0	0	0	3	1	3	4	0	0	1	2	1	0	0	0	5.3	109	23	98	1.3		68
152	2318	0	2318	0	2318	0	0	139	138.856	47	2	58.3	0	1	0	0	0	0	0	0	4	0	1	2	0	0	0	2	1	0	0	0	4.5	109	20	91	1.5	42.9	61	0	0
153	2302	0	2302	0	2302	0	0	141	140.792	35	2	56.8	0	1	0	0	0	0	0	0	3	0	1	3	0	0	1	2	1	0	0	0	4.5	106	25	87	1	67.2	48	0
154	2259	0	2259	0	11	1	0	139	139.016	44	2	46.7	0	1	0	0	0	0	0	0	2	0	3	5	1	0	1	2	1	0	0	0	4.6	106	25	101	1.6	37.3			0
155	2283	0	2283	0	2283	0	0	143	143.384	49	1	88.8	0	1	0	0	0	0	0	0	4	0	3	4	0	0	1	2	1	0	0	0	3.8	109	23	124	1.3	57.3	65		0
156	2275	0	2275	0	21	1	0	141	140.648	56	1	63.3	1	1	1	0	0	0	1	0	1	0	3	5	0	0	1	2	1	0	0	0	6.4	114	18	78	2	35	54	0	0
157	2233	0	2233	0	16	1	0	143	143.096	31	2	64.1	0	0	0	0	0	0	0	0	2	0	3	2	0	0	1	2	1	0	0	0	5	108	24	106	1.5	46.7	57	0	0
158	1019	0	1019	0	1019	0	0	137	141.928	57	2	53.8	0	1	1	0	0	0	0	0	1	0	3	5	0	0	1	2	1	0	0	0	4.5	98	29	408	1.8	30.9	57		0
159	1709	0	1709	0	1709	0	0	143	143.8	57	2	62.2	0	1	1	0	0	0	0	0	1	0	1	5	0	0	1	2	1	0	0	0	5	106	25	150	1	60.8	42	0
160	2241	0	2241	0	392	1	0	142	142.16	29	1	63.8	0	0	0	0	0	0	0	0	4	1	3	4	0	0	1	2	1	0	0	0	4.4	110	21	110	1.5		75	0
161	2259	0	2259	0	2259	0	0	142	142.144	55	1	74.6	0	1	1	0	0	0	0	0	1	0	3	5	0	0	1	2	1	0	0	0	4.7	103	28	109	1	82.6	51
162	1727	0	1727	1	1727	0	0	139	139.064	29	2	50.3	0	1	1	0	0	0	0	0	1	0	1	4	0	0	0	2	1	0	0	0	3.9	103	30	104	1.4	47.3	65	0	0
163	2199	0	2199	0	2199	0	0	142	141.92	51	2	67.6	0	1	0	0	0	0	0	0	3	0	1	0	0	0	0	2	1	0	0	0	4.6	107	25	95	1.4	46	60	0	0
164	172	1	172	0	172	0	1	131	132.664	68	1	59.2	0	1	1	0	0	0	0	0	1	0	3	3	0	0	1	1	1	0	0	0	4.1	96	23	204	1.4	49.5	47	1
165	2183	0	2183	0	2183	0	0	141	140.712	32	1	53.1	1	1	0	0	0	0	0	0	4	0	1	1	0	0	1	1	1	0	0	0	4.2	102	30	82	1.6	53.6	58	0	0
166	2183	0	2183	0	2183	0	0	141	142.216	56	2	65.3	0	1	1	1	0	0	0	0	1	0	2	5	0	0	1	2	1	0	0	0	4.5	98	32	176	1.2	49.5	56	0	0
167	2190	0	2190	0	2190	0	1	132	131.808	62	1	56.4	0	0	0	0	0	0	0	0	4	0	1	3	0	0	1	2	1	0	0	0	4.3	95	24	88	1.1	65.3	68	1	0
168	2113	0	2113	0	2113	0	0	144	144.224	55	1	64.3	0	1	0	0	0	0	0	0	3	0	1	2	0	0	1	1	1	0	0	0	4.6	104	26	114	1.6	48	66	0	0
169	2164	0	2164	0	2164	0	0	142	141.808	43	2	59.3	0	0	0	0	0	0	0	0	4	0	3	5	0	0	1	1	1	0	0	0	3.5	109	21	88	1.2	52.2	56		0
170	2084	0	2084	0	2084	0	0	142	141.84	60	2	58.8	0	1	0	0	0	0	0	0	2	0	3	5	0	0	1	1	1	0	0	0	3.8	108	20	90	2	40.8	61
171	2092	0	2092	0	15	1	0	140	140.192	38	1	83.6	0	0	0	0	0	0	0	0	2	0	2	5	0	0	1	2	1	0	0	0	4.6	105	29	112	1.3	65.8	61	0	0
172	2169	0	2169	0	47	1	0	139	139.848	54	1	72.2	0	1	1	0	1	0	0	0	1	0	1	1	0	0	1	2	1	0	0	0	5.2	107	21	153	1.7	48.2	63	0	0
173	2111	0	2111	0	2111	0	0	141	141	49	1	76	1	1	0	0	0	0	0	1	3	0	3	4	0	0	1	2	1	0	0	0	4.1	108	23	100	1.2	68.5	70	0
174	2083	0	2083	0	256	1	0	141	140.584	21	1	67.7	0	0	0	0	0	0	0	0	3	0	3	4	0	0	1	1	1	0	0	0	4.5	112	19	74	1.1	90	54	0	0
175	2092	0	2092	0	42	1	0	144	143.856	25	1	53.5	0	1	0	0	0	0	0	0	3	0	3	4	0	0	1	1	1	0	0	0	3.9	104	32	91	1.5	60.7	56		0
176	2099	0	2099	0	2099	0	0	142	141.856	49	2	52.9	0	1	0	0	0	0	0	0	2	0	2	3	0	0	1	2	1	0	0	0	4	107	22	91	1.1	56.2	64	0	0
177	2049	0	2049	0	2049	0	0	141	140.824	28	2	46	0	1	0	0	0	0	0	0	4	0	3	1	0	0	1	1	1	0	0	0	4.1	105	24	89	1.1	70.3		0	0
178	2080	0	2080	0	2080	0	0	139	138.664	41	2	46.3	0	1	0	0	0	0	0	0	2	0	1	3	0	0	0	2	1	0	0	0	4.1	102	26	79	0.7	98.2	67	0
179	2080	0	2080	0	2080	0	0	141	140.888	49	2	57.3	0	1	0	0	0	0	0	0	2	0	1	2	0	0	0	2	1	0	0	0	4.5	106	26	93	0.8	81.2	58	0
180	2099	0	2099	0	2099	0	0	140	139.952	20	1	50.1	0	1	0	0	0	0	0	0	4	0	2	2	0	0	1	2	1	0	0	0	4.4	104	27	97	0.9	114.5		0
181	2064	0	2064	0	2064	0	0	138	137.696	46	2	44.9	0	1	0	0	0	0	0	0	4	0	2	5	0	0	1	2	1	0	0	0	4.8	110	20	81	0.8	82.2	77	0	0
182	2081	0	2081	0	2081	0	0	141	140.744	22	1	53.1	0	0	0	0	0	0	0	0	3	0	3	3	0	0	1	2	1	0	0	0	4.4	105	25	84	1.3	73.5	58		0
183	2065	0	2065	0	2065	0	0	141	140.888	45	2	84.1	0	1	0	0	0	0	0	0	2	0	1	4	0	1	1	2	1	0	0	0	4.1	109	25	93	1.2	51.7	66	0	0
184	2085	0	2085	0	2085	0	0	141	141.208	37	1	71.2	0	1	0	0	0	0	0	0	2	0	1	0	0	0	0	2	1	0	0	0	4.9	108	24	113	1.6	52	58	0	0
185	2077	0	2077	0	2077	0	0	144	144.016	24	1	75.8	0	0	1	0	0	0	0	0	2	1	3	7	0	0	1	2	1	0	0	0	4.7	114	20	101	1.7		68		0
186	2092	0	2092	0	5	1	0	141	143.832	66	2	63.2	0	1	0	1	0	0	0	0	3	0	3	4	0	0	1	2	1	0	0	0	3	103	24	277	1.4	40.1	44		0
187	2059	0	2059	0	2059	0	0	141	140.712	27	1	71.9	0	0	0	0	0	1	0	0	3	0	3	3	0	0	1	2	1	0	0	0	4.1	107	21	82	1.6	55.5	56		0
188	2075	0	2075	0	2075	0	0	139	139.736	49	2	55.8	0	0	0	0	0	0	0	0	2	0	3	5	0	0	1	2	1	0	0	0	4.3	101	24	146	2.4	39.3	65	0	0
189	2074	0	2074	0	2074	0	0	139	138.952	49	2	52.9	0	1	0	0	0	0	0	0	3	0	3	2	0	0	1	2	1	0	0	0	5	110	25	97	1	62.7	63		0
190	2047	0	2047	0	12	1	0	141	140.92	26	1	70	0	1	1	0	0	0	0	0	1	0	3	1	0	0	1	2	1	0	0	0	4.1	111	22	95	1.1	86.1	64	0	0
191	938	1	911	1	938	0	0	139	138.968	60	2	53.8	1	1	0	0	0	0	0	0	3	0	3	3	0	0	1	2	1	0	0	0	4.2	100	26	98	1.7	48.8		0	0
192	1980	0	1980	0	1980	0	0	141	140.808	38	1	55	0	1	0	0	0	0	0	0	2	0	2	6	0	0	1	2	1	0	0	0	4.7	111	22	88	1.8	45.2	47	0	0
193	2033	0	2033	0	2033	0	0	142	141.568	55	2	52.7	0	1	0	0	0	0	0	0	3	0	3	4	0	0	1	2	1	0	0	0	4.4	105	30	73	0.7	92.5
194	650	0	650	0	650	0	0	144	144.208	47	1	69.1	0	1	0	0	0	0	0	0	2	0	1	3	0	0	1	2	1	0	0	0	3.9	106	26	113	1.5	53.4	55	0	0
195	1982	0	1982	0	1982	0	0	140	139.856	30	2	48.9	0	1	0	0	0	0	0	0	2	0	1	3	0	0	1	2	1	0	0	0	4.3	103	24	91	1.1	62.1	65	0	0
196	1960	0	1960	0	1778	1	0	140	139.92	29	1	67.9	0	1	0	0	0	0	0	0	4	0	1	3	0	0	1	2	1	0	0	0	3.9	105	22	95	1.6	54.7	61	0
197	1960	0	1960	0	1960	0	0	144	143.824	48	2	53.4	0	1	0	0	0	0	0	0	3	0	3	4	0	0	1	2	1	0	0	0	5.1	111	21	89	1.2	46.5	55
198	1967	0	1967	0	1967	0	0	143	142.792	57	2	62	0	1	0	0	0	0	0	0	3	0	3	4	0	0	1	2	1	0	0	0	4	108	24	87	0.9	60.8	61	0
199	1980	0	1980	0	7	1	0	142	141.696	39	1	69	1	1	0	0	0	0	0	0	4	0	2	6	0	0	1	2	1	0	0	0	4.3	106	26	81	1.8	48	50		0
200	1905	0	1905	0	1905	0	0	141	140.856	60	1	58	0	1	0	0	0	0	0	0	2	1	3	7	0	0	1	2	0	0	0	0	4.4	107	19	91	1.3		56	0
201	1939	0	1939	0	1939	0	0	141	140.728	40	2	50.7	0	1	0	0	0	0	0	0	2	0	3	4	0	0	1	2	0	0	0	0	5.2	107	24	83	0.9	73.8		0
202	1959	0	1959	0	390	1	0	138	137.664	60	1	59.1	0	1	0	1	0	0	0	0	3	0	3	5	0	0	1	2	1	0	0	0	4.3	105	21	79	1.8	41.2	64
203	1931	0	1931	0	1931	0	0	142	141.952	52	1	54.5	0	1	0	0	0	1	0	0	3	0	2	5	0	0	1	2	1	0	0	0	4.1	104	29	97	1.4	56.7	58	0
204	1896	0	1896	0	1896	0	0	145	144.76	39	1	77.8	0	1	0	0	0	0	0	0	3	0	1	0	0	0	0	1	1	0	0	0	4.2	105	27	85	1.1	79.3	69	0	0
205	1956	0	359	1	362	1	0	139	139.256	46	2	66.4	0	1	1	0	0	0	0	0	1	0	1	2	0	0	1	2	1	0	0	0	4.8	107	21	116	1	71.8	36	1	0
206	1915	0	1915	0	1915	0	0	140	139.68	42	1	73.1	0	1	1	0	0	0	0	0	3	1	3	7	0	0	1	2	1	0	0	0	4.1	104	25	80	1.1		56		0
207	1933	0	1933	0	1933	0	0	143	144.504	41	1	60.2	0	1	0	0	0	0	0	0	4	0	1	0	0	0	0	2	1	0	0	0	4.3	104	27	194	1.5	59.5	58	0	0
208	1856	0	1856	0	1856	0	0	140	140.064	28	1	62.9	0	1	0	0	0	1	0	0	4	0	1	1	0	0	1	2	1	0	0	0	4.3	107	24	104	1.7	51.3	61	0	0
209	1890	0	1890	0	1890	0	0	142	141.536	31	1	42.1	0	1	0	1	0	0	0	0	3	0	1	3	0	1	1	2	1	0	0	0	4.4	109	21	71	1.1	83.1	56	0
210	453	0	453	0	453	0	0	141	141.048	61	1	57.7	0	1	0	0	1	0	1	0	2	0	3	5	0	0	1	2	1	0	0	0	4.6	106	26	103	1.4	59.7	73	0	0
211	1861	0	1861	0	1861	0	0	139	138.728	30	1	61.6	1	1	0	1	0	1	0	0	3	0	1	5	0	1	1	2	1	0	0	0	4.1	103	28	83	1.5	58.5	68	0	0
212	1850	0	1850	0	1850	0	0	140	139.712	37	1	48.2	0	1	0	0	0	0	0	0	2	0	1	1	0	1	0	2	1	0	0	0	4.5	108	24	82	1	89.5	57	0	0
213	1844	0	1844	0	1844	0	0	139	139.048	54	1	72.3	0	1	1	1	0	1	0	0	1	0	3	5	0	0	1	2	1	0	0	0	5.1	106	26	103	1.2	67.2	56	0	0
214	1861	0	1861	0	9	1	0	141	141.992	54	1	65	0	1	1	0	0	0	1	0	1	0	3	4	0	0	1	2	1	0	0	0	4.5	104	28	162	1.5	51.9	58	0	0
215	1806	0	1806	0	1806	0	0	145	144.888	48	1	47.1	1	1	0	0	1	0	1	0	2	0	3	5	0	0	1	2	1	0	0	0	4.4	108	27	93	1.6	46	60		0
216	1879	0	1879	0	1879	0	0	144	143.792	37	2	48.6	0	1	0	0	0	0	0	0	2	0	3	5	0	0	1	2	1	0	0	0	3.7	106	26	87	1.1	59.5	57		0
217	1870	0	1870	0	1870	0	0	145	144.808	53	2	60.5	0	1	0	0	0	0	0	0	4	0	1	2	0	0	0	2	1	0	0	0	4.5	107	25	88	1	69.7	70	0	0
218	1885	0	1885	0	29	1	0	140	141.328	49	1	57.9	0	1	1	0	0	0	0	0	1	0	1	4	0	0	1	2	1	0	0	0	5.4	107	23	183	1.8	42.9	51		0
219	1870	0	1870	0	1870	0	0	140	140.048	44	2	54.1	0	1	0	0	0	1	0	0	4	0	3	3	1	0	1	2	1	0	0	0	4.3	106	23	103	0.9	72.4	66	1
220	1896	0	1896	0	1896	0	0	142	141.792	39	2	52	0	1	0	0	0	0	0	0	4	0	1	4	0	0	1	2	1	0	0	0	4.8	113	20	87	1.4	44.6		0	0
221	1828	0	1828	0	1828	0	0	139	139.08	49	2	42.2	0	1	0	0	0	0	0	0	4	0	1	3	1	0	1	2	1	0	0	0	4.9	106	24	105	1	62.7	77	0	0
222	1848	0	1848	0	1848	0	0	141	140.936	42	1	71.3	0	0	0	0	1	0	0	0	3	0	3	5	0	0	1	2	1	0	0	0	3.9	108	22	96	1.1	78.1		0	0
223	1847	0	1847	0	1847	0	0	143	143.016	60	1	73.3	0	1	0	0	0	0	0	0	2	0	1	3	0	0	1	1	1	0	0	0	3.9	106	28	101	1.3	65.7	57	0	0
224	1868	0	1868	0	11	1	0	143	142.76	59	2	52.8	0	1	0	0	0	0	0	0	2	0	3	5	0	0	1	2	1	0	0	0	4.1	108	28	85	0.9	68.2	58		0
225	1855	0	1855	0	9	1	0	144	144.384	65	2	63	0	1	0	0	0	0	0	0	3	0	1	6	0	1	1	2	1	0	0	0	4	109	24	124	0.9	76.6
226	1847	0	1847	0	908	1	0	141	140.728	34	1	57.2	0	1	0	0	0	0	0	0	4	0	2	3	0	0	1	1	1	0	0	0	4.5	108	22	83	1.6	52.9	65	0	0
227	1870	0	1870	0	1870	0	0	143	142.824	24	1	69.7	0	1	0	0	0	0	0	0	2	0	3	3	0	0	1	1	1	0	0	0	4.4	107	25	89	1.2	79.2	57	0	0
228	1848	0	1848	0	1848	0	0	142	141.68	59	1	69.6	0	1	1	0	0	0	0	0	1	0	1	0	0	0	0	1	1	0	0	0	4.4	104	27	80	1.2	66	58	0	0
229	1862	0	1862	0	1862	0	0	140	141.344	59	2	59.4	0	1	1	0	0	0	0	0	1	0	1	3	0	0	1	2	1	0	0	0	4.9	103	32	184	1	60.4	62	0	0
230	1863	0	1863	0	1863	0	0	139	138.792	36	1	43	0	1	0	0	0	0	0	0	4	1	2	7	0	0	1	2	1	0	0	0	4.6	104	27	87	1.1		54	0	0
231	1828	0	1828	0	1828	0	0	139	138.536	45	1	54.1	0	0	1	0	1	1	1	0	1	0	2	4	0	0	1	2	0	0	0	0	3.9	109	20	71	1.1	63.6	60	1	0
232	1840	0	1840	0	1840	0	0	143	142.936	50	2	51.8	0	1	0	0	0	0	0	0	3	0	1	2	1	0	1	2	1	0	0	0	4.3	106	26	96	1.2	50.6	64	0	0
233	1846	0	1846	0	1846	0	0	144	143.504	49	2	64.2	0	1	0	0	0	0	0	0	2	0	3	3	0	0	1	2	1	0	0	0	4.4	108	27	69	1.5	39.3	56	0
234	1809	0	1809	0	1809	0	0	141	140.824	52	2	47.4	0	1	0	0	0	1	0	0	4	0	3	5	0	0	1	2	1	0	0	0	4	108	23	89	1.3	45.8		0	0
235	1833	0	1833	0	1797	1	0	138	137.472	46	2	61.7	0	1	1	0	0	0	0	0	1	0	1	3	0	1	1	2	1	0	0	0	4.7	103	27	67	1	71.8	60	0	0
236	1840	0	1840	0	1840	0	1	135	134.568	57	2	73.5	0	1	1	0	0	0	0	0	1	0	1	4	0	0	1	2	1	0	0	0	4.5	101	19	73	1.3	38.1	66	1	0
237	1629	0	1629	0	844	1	0	140	141.072	47	1	56.8	1	1	1	0	0	0	0	0	1	0	3	0	0	0	1	2	1	0	0	0	4.1	105	25	167	1	85.3		0
238	1825	0	1825	0	1825	0	0	140	141.536	56	1	52.5	0	0	1	0	0	0	0	0	1	0	2	6	0	0	1	2	1	0	0	0	4.2	102	30	196	0.9	69		0	0
239	1812	0	1812	0	1812	0	0	142	141.856	50	1	60	0	1	0	0	0	1	0	0	3	0	2	4	0	1	1	1	1	0	0	0	4.4	106	26	91	1.2	68.2	40	0	0
240	1827	0	1827	0	1827	0	0	145	144.856	44	2	55	0	1	0	0	0	1	1	0	3	0	3	4	0	0	1	2	0	0	0	0	4.1	112	24	91	1	64.1			0
241	1777	0	1777	0	1777	0	0	139	138.6	33	1	59.2	0	1	0	0	0	0	0	0	2	0	1	0	0	0	0	2	1	0	0	0	3.9	103	23	75	1.2	74.2	39	1	0
242	1826	0	1826	0	1826	0	0	142	141.936	54	2	62	0	1	1	1	0	0	1	0	1	0	1	3	0	0	1	2	1	0	0	0	4.2	105	28	96	0.9	69.5	62	0
243	1822	0	1011	1	1015	1	0	140	139.744	22	1	66.8	0	0	0	0	0	0	0	0	3	0	1	2	0	0	1	1	1	0	0	0	3.9	102	25	84	1.7	57.8	56	0	0
244	1815	0	1815	0	24	1	0	140	139.664	38	2	49.9	0	0	0	0	0	0	0	1	4	0	3	0	0	0	1	2	1	0	0	0	4.4	109	23	79	1.7	35.8	30		0
245	1788	0	1788	0	10	1	0	140	139.728	33	1	50.8	0	1	0	0	0	0	0	0	2	0	3	5	0	0	1	2	1	0	0	0	4.5	105	26	83	1.4	46.1	63		0
246	1796	0	1796	0	1796	0	0	138	137.712	37	2	62	0	1	0	0	0	0	0	0	2	0	3	0	0	0	1	2	1	0	0	0	4.1	107	22	82	0.9	74.1		1	0
247	1811	0	1811	0	1811	0	1	134	133.616	45	2	46	0	1	0	0	0	1	0	0	4	1	3	4	0	0	1	2	1	0	0	0	5.7	104	22	76	1		62
248	1731	0	1731	0	1731	0	0	141	140.76	41	2	43	0	1	0	0	0	0	0	0	2	0	3	0	0	0	1	2	1	0	0	0	4.7	106	23	85	1.6	38.9	63		0
249	1770	0	1770	0	1770	0	0	144	143.776	37	1	63.6	0	1	0	0	0	1	0	0	4	0	1	2	0	0	1	1	1	0	0	0	4.2	107	26	86	1.8	45.4	55	0	0
250	1774	0	1774	0	1774	0	0	137	136.648	43	1	45.3	0	1	0	0	0	0	0	0	4	1	3	7	0	0	1	2	1	0	0	0	4.3	106	20	78	1.2		61		0
251	1777	0	1777	0	1777	0	0	139	138.792	44	1	81.8	0	1	0	0	0	0	0	0	4	0	1	3	0	0	1	2	1	0	0	0	4.1	105	23	87	1.3	61.6	50	0
252	1752	0	1752	0	1752	0	0	140	140.608	45	1	66	0	1	0	0	1	0	1	0	4	0	3	3	0	0	1	2	1	0	0	0	4.7	115	16	138	1.5	56.9	61		0
253	1765	0	1765	0	15	1	0	144	144	34	1	70.1	0	1	1	1	0	0	0	0	1	0	3	4	0	0	1	2	1	0	0	0	5.5	109	28	100	2	44.8		0	0
254	1689	0	1689	0	1689	0	0	141	140.824	53	2	53.1	0	1	0	0	0	0	0	0	3	0	3	5	1	0	1	2	1	0	0	0	4.8	107	27	89	1.1	62.5		0	0
255	1758	0	1758	0	359	1	0	141	140.76	44	1	74	0	1	0	0	0	0	0	0	4	0	3	5	0	0	1	2	1	0	0	0	4.7	112	20	85	1.5	54.1		0	0
256	1718	0	1718	0	1718	0	0	141	141.032	60	1	52	1	1	0	0	0	1	0	0	4	0	3	6	0	0	1	2	1	0	0	0	4.3	109	20	102	1.2	74.2	56		0
257	1715	0	1715	0	1715	0	0	144	144.016	57	1	74.1	0	1	0	0	0	1	0	0	2	0	1	4	0	0	1	2	1	0	0	0	4	104	25	101	1.5	50.2	58	0	0
258	1713	0	1713	0	1713	0	0	142	142.912	66	1	48.5	0	1	1	1	0	0	0	0	1	0	3	5	0	0	1	2	1	0	0	0	4.8	110	21	157	1.8	40.9			0
259	1740	0	1740	0	1740	0	0	141	140.728	62	2	58.9	0	1	0	0	0	0	0	0	3	0	3	6	0	0	1	2	1	0	0	0	4.5	103	27	83	1.1	52.5	52		0
260	1742	0	1742	0	12	1	0	137	136.888	26	2	54.4	0	0	0	0	0	1	0	0	2	0	1	5	0	0	1	2	1	0	0	0	4.2	104	26	93	1	69.7	51	0	0
261	1681	0	1681	0	10	1	0	143	142.776	52	2	51.9	0	1	0	0	0	0	0	0	4	0	2	4	1	1	1	2	1	0	0	0	3.9	108	28	86	1	61.3	54	0	0
262	1708	0	1708	0	1708	0	0	144	143.904	62	1	68.5	0	1	1	0	0	0	0	0	2	0	3	3	0	0	1	2	1	0	0	1	4.1	108	24	94	1.2	75.4	64		0
263	1735	0	1735	0	294	1	0	145	144.632	21	2	39.6	0	0	0	0	0	0	0	0	3	0	1	3	0	0	1	2	1	0	0	0	3.5	112	24	77	0.7	92.4	50	0	0
264	1737	0	1737	0	9	1	0	139	138.776	49	1	58.2	0	1	0	0	0	0	0	0	4	0	2	4	0	1	1	2	1	0	0	0	4.7	107	22	86	1.3	63	65	0	0
265	1734	0	1734	0	1734	0	0	142	143.6	51	2	49.4	0	1	0	0	0	0	0	0	2	1	3	4	0	0	1	2	1	0	0	0	4.3	110	25	200	1.3		62	0	0
266	1691	0	1691	0	1691	0	1	135	134.792	41	2	60.1	0	1	1	0	0	0	0	0	1	0	3	3	0	0	1	2	0	0	0	0	4.6	103	23	87	1.2	51.2	71	0	0
267	1700	0	1700	0	1700	0	0	140	139.856	55	1	62.7	0	1	1	0	0	0	0	0	3	1	3	5	0	0	1	2	1	0	0	0	4.5	106	25	91	1.5		48	0	0
268	1636	0	1636	0	1636	0	0	139	138.872	33	2	54.3	0	0	0	0	0	0	0	0	2	0	3	4	0	0	1	2	1	0	0	0	4.5	103	26	92	0.7	99.3	64	0	0
269	1635	0	1635	0	1635	0	0	137	137.032	55	2	49.5	0	1	1	0	0	0	0	0	1	0	2	5	0	1	1	2	1	0	0	1	5.5	103	26	102	1.1	51.1	65	0	0
270	1628	0	1628	0	1628	0	0	142	141.616	37	1	78.3	0	1	0	0	0	0	0	0	3	0	1	0	0	0	1	1	1	0	0	0	4.3	104	28	76	1.9	50.9	60	0	0
271	1628	0	1628	0	1628	0	0	144	143.888	40	1	63.5	1	0	0	0	0	0	0	0	2	0	1	1	0	0	1	1	0	0	0	0	4.3	106	28	93	1.6	51.2	70	0	0
272	1621	0	1621	0	1621	0	0	142	142.544	48	1	67.6	1	1	1	1	0	0	0	0	1	0	2	4	0	0	1	2	1	0	0	0	5.3	110	27	134	1.2	62.7	67	0	0
273	1614	0	1614	0	1614	0	0	139	139.72	40	2	65.5	0	1	0	0	0	0	0	0	3	0	1	3	1	1	1	2	1	0	0	0	4.4	106	22	145	0.9	71.1	56		0
274	1608	0	1608	0	1608	0	0	142	141.728	52	1	70.1	0	0	0	0	1	1	1	0	4	1	3	6	0	0	1	2	1	0	0	0	4.7	109	27	83	2		60	0	0
275	954	0	954	0	9	1	0	141	141.448	46	1	60.4	0	1	1	1	0	1	0	0	1	0	1	5	0	0	1	1	1	0	0	0	4.1	106	25	128	1	85.6	35	0
276	1605	0	1605	0	10	1	0	141	140.888	55	2	67.5	0	1	0	0	0	0	0	0	3	0	3	5	0	0	1	2	1	0	0	0	4	105	27	93	1.5	48.3	57	0	0
277	1604	0	1604	0	1604	0	0	138	137.808	22	2	76.1	0	0	0	0	0	0	0	0	3	1	3	3	0	0	1	2	1	0	0	1	5.5	110	21	88	1.2		63	0	0
278	1604	0	1604	0	317	1	0	140	140.88	50	1	86.2	1	1	1	1	0	0	0	0	1	0	3	5	0	0	1	2	1	0	0	0	5.4	107	29	155	1.8	43.9		0	0
279	1600	0	1600	0	1600	0	0	138	137.92	37	2	53	0	1	0	0	0	0	0	0	4	0	1	0	0	0	1	1	1	0	0	0	4.4	102	28	95	1.1	58.9	71	0	0
280	1586	0	1586	0	1586	0	0	139	138.776	40	1	73.8	0	1	0	0	0	0	0	0	3	0	1	0	0	0	1	1	1	0	0	0	4.4	107	24	86	1.1	77.3	64	0	0
281	1579	0	1579	0	1579	0	0	145	144.92	56	2	47.8	0	0	0	0	0	0	0	0	4	0	1	2	0	0	0	1	1	0	0	0	4.8	107	25	95	1	71.7		0	0
282	1572	0	1572	0	1572	0	0	140	144.272	46	2	59.3	0	0	0	0	0	0	0	0	3	0	1	3	0	0	1	1	1	0	0	0	3.9	99	31	367	1	56.3	62	0	0
283	1572	0	1572	0	1572	0	0	143	142.84	52	2	51.4	0	1	0	0	0	0	0	0	2	0	1	4	0	0	1	1	1	0	0	0	3.5	105	28	90	0.7	90.6		0	0
284	1565	0	1565	0	106	1	0	138	139.28	50	2	50	0	1	0	0	0	0	0	1	4	0	3	2	0	0	1	2	1	0	0	1	3.9	105	22	180	1.1	51.6	65	0	0
285	1558	0	1558	0	1558	0	0	140	139.92	39	2	48.2	0	0	0	0	0	0	0	0	2	0	2	2	0	0	1	2	1	0	0	0	4.1	104	26	95	0.7	86.3	53	0	0
286	1551	0	1551	0	1551	0	0	142	141.696	21	1	59.4	0	0	0	0	0	0	0	0	3	0	1	2	0	0	1	1	1	0	0	0	3.8	104	27	81	1.9	50.3	58	0	0
287	1574	0	1574	0	9	1	0	138	139.664	60	1	68.7	0	1	1	1	0	0	0	0	1	0	1	2	0	0	1	2	1	0	0	0	5.2	101	26	204	1.1	61	59	1	0
288	1544	0	1544	0	1544	0	0	139	138.696	59	1	53.6	1	1	1	0	0	0	0	0	1	0	3	2	0	0	1	2	1	0	0	0	5.2	110	24	81	1.2	66.6	51	0	0
289	1536	0	1536	0	106	1	0	140	139.872	54	1	68.9	0	1	0	0	0	0	0	0	3	0	3	3	0	0	1	1	1	0	0	0	4.9	111	21	92	1.8	50.4	68	0	0
290	1532	0	1532	0	10	1	0	140	139.984	50	2	63.5	0	0	0	0	0	0	0	0	2	0	2	3	1	0	1	2	1	0	0	0	5	103	27	99	1.5	47.4		0	0
291	1526	0	1526	0	1526	0	0	144	144.064	42	1	81.2	0	1	0	0	0	0	0	0	3	0	3	1	0	0	1	1	1	0	0	0	4	108	26	104	1.5	49.6	45	0	0
292	1523	0	1523	0	1523	0	0	144	143.84	58	1	57.8	0	1	0	0	0	0	0	0	2	0	1	0	0	0	1	1	1	0	0	0	4.2	107	28	90	1.7	45.8	66	0	0
293	1522	0	1522	0	1522	0	0	141	140.984	52	1	87	0	1	0	1	0	0	0	0	2	0	3	3	0	0	1	2	1	0	0	0	4.9	108	24	99	1.8	58.1	67	0	0
294	1516	0	1516	0	778	1	0	139	139.048	57	1	71.1	0	1	0	0	0	0	0	0	4	0	1	2	0	0	1	1	1	0	0	0	4.6	103	26	103	1	80.1	58	0	0
295	1513	0	1513	0	12	1	0	138	138.736	60	1	68.5	0	1	1	1	0	0	0	0	4	0	3	4	0	0	1	2	0	0	0	0	5.3	103	22	146	2.3	35.8	60	0	0
296	1516	0	1516	0	1516	0	0	137	138.728	55	1	77.6	0	1	1	1	0	0	1	0	1	0	3	4	0	0	1	2	1	0	0	0	4.8	102	25	208	2.3	49.1		0	0
297	1509	0	1509	0	359	1	0	140	140.256	49	1	75.1	1	1	0	0	0	0	0	0	4	0	1	2	0	0	1	2	1	0	0	0	5.5	107	29	116	1.8	43.2	63	0	0
298	1509	0	1509	0	12	1	0	140	139.936	20	2	53.3	0	1	0	0	0	0	0	0	3	0	1	3	0	1	1	2	1	0	0	1	4.1	116	17	96	0.9	115.5	60	0	0
299	1501	0	1501	0	1501	0	0	141	140.776	51	1	58.3	0	1	0	0	0	0	0	1	4	1	3	1	0	0	1	2	1	0	0	0	4.8	104	27	86	1.7		68	0	0
300	1494	0	1494	0	1494	0	0	143	142.824	34	2	48.3	0	0	0	0	0	0	0	0	4	0	3	3	0	0	1	2	1	0	0	0	4.2	108	24	89	1.2	56.4	54	0	0
301	1488	0	1488	0	9	1	0	139	140.504	49	1	59.3	0	1	1	0	0	0	0	0	1	0	2	5	0	0	1	1	1	0	0	0	4.3	106	27	194	0.8	103.4	49	0	0
302	1481	0	1481	0	1481	0	0	138	137.776	30	1	60.1	0	1	0	0	0	0	0	0	4	0	1	3	0	0	0	1	1	0	0	0	4.6	104	23	86	1.9	50.3	70	0	0
303	1502	0	1502	0	1502	0	0	142	142.016	65	1	70.7	0	1	0	1	0	0	0	0	4	0	3	4	0	0	1	2	1	0	0	0	4.3	107	27	101	1.2	67.3	34		0
304	1467	0	1467	0	1467	0	0	141	140.904	42	2	53.8	0	1	0	0	0	0	1	0	2	0	2	5	0	0	1	2	1	0	0	0	3.5	104	30	94	0.8	76	60	0	0
305	1463	0	1463	0	1463	0	0	145	144.824	57	2	57.3	0	1	0	0	0	0	0	0	4	0	3	1	0	0	1	2	1	0	0	0	4.5	108	32	89	1.2		65	0	0
306	1460	0	1460	0	363	1	0	140	139.824	54	1	75.9	0	1	0	0	0	0	0	0	2	0	2	5	0	0	1	2	1	1	0	0	4.1	109	22	89	1.1	72	59	0	0
307	636	0	636	0	636	0	0	142	142.112	44	2	57.6	0	1	0	0	0	0	0	0	4	1	3	7	0	0	1	2	1	0	0	0	3.9	111	22	107	0.8		65	0	0
308	1056	0	1056	0	9	1	0	144	143.744	23	1	56.7	0	0	0	0	0	0	0	0	2	0	2	6	0	0	1	1	1	0	0	0	4.6	108	19	84	1.2	93.2	45	0	0
309	581	0	429	0	9	1	0	142	141.664	30	1	68.6	0	1	0	0	0	0	0	0	4	0	1	3	0	1	1	2	1	0	0	0	4.3	106	27	79	1.8	48	61	0	0
310	1450	0	1450	0	1450	0	0	142	143.008	58	1	61.8	0	1	1	1	1	0	1	0	1	0	3	5	0	0	1	1	1	0	0	0	3.6	103	22	163	1.7	46.8	58	0	0
311	1481	0	1481	0	1481	0	0	136	141.008	65	1	74.8	1	1	1	0	0	0	0	0	1	0	3	5	0	0	1	2	0	0	0	1	5.2	99	23	413	1.5	44.8	42	0	0
312	1446	0	1446	0	1446	0	0	143	142.888	46	2	61.2	0	1	0	0	0	0	0	0	3	0	2	2	0	0	1	1	1	0	0	0	3.2	103	28	93	0.9	69.1	56	0	0
313	1307	0	869	1	713	1	0	140	140.192	51	1	74.1	0	1	1	0	0	0	0	0	1	0	2	1	0	1	1	2	1	0	0	0	4.5	108	21	112	1.5	53.3	57	0	0
314	1328	0	1328	0	1327	1	0	138	137.824	21	1	76	0	1	0	0	0	0	0	0	3	1	3	4	1	0	1	2	1	0	0	0	5.5	111	20	89	1.4		58	0	0
315	1436	0	1436	0	1436	0	0	142	141.776	63	1	78.5	0	1	1	0	0	0	0	0	1	0	2	6	0	0	1	2	1	0	0	0	4.4	107	22	86	1.4	43.6	55	0	0
316	1432	0	1432	0	1432	0	0	143	143.432	49	1	61.7	0	1	1	0	1	0	0	0	1	0	1	3	1	0	1	2	1	0	0	0	5.1	109	25	127	1.4	59.8	56	1	0
317	1455	0	1455	0	331	1	0	139	139.528	62	1	80.9	0	1	1	0	0	1	0	0	1	0	1	3	0	0	1	1	1	0	0	0	4.9	108	25	133	1.2	64.7	55	0	0
318	1419	0	1419	0	10	1	0	140	139.984	35	1	68.7	1	1	0	0	0	0	0	0	4	0	3	1	0	0	1	2	1	0	0	0	4.6	109	19	99	1.2	65.7		1	0
319	1418	0	1418	0	1418	0	0	144	144.272	33	2	28.1	0	1	1	0	0	0	0	0	1	0	1	2	0	0	1	2	0	0	0	0	4.1	111	22	117	0.9	76.8	49	0	0
320	1402	0	1402	0	372	1	0	142	141.904	27	1	53.8	0	1	0	0	0	0	0	0	2	0	3	5	0	0	1	2	1	0	0	0	4.5	112	20	94	1.6	54.7	63	0	0
321	1406	0	1406	0	1406	0	0	139	138.76	32	1	73.5	0	1	0	0	0	0	0	0	2	0	3	0	0	0	1	2	1	0	0	0	4.6	107	21	85	1.5	56.4	67	0	0
322	1404	0	1404	0	13	1	0	140	139.248	53	1	68.7	1	1	1	0	0	0	0	0	1	0	1	4	0	0	1	2	1	0	0	0	4.3	107	22	53	1.7	81.3	39	0	0
323	1404	0	1404	0	282	1	0	138	138.192	49	2	68.2	0	1	0	0	0	0	0	0	4	0	1	2	0	1	1	2	1	0	0	0	5.1	105	28	112	1.2	59.3	63	0	0
324	1404	0	1404	0	1404	0	0	139	138.52	25	2	59.7	0	1	0	0	0	0	0	0	2	0	3	5	1	0	1	2	1	0	0	0	4.9	108	23	70	1	60	54	0	0
325	1378	0	1378	0	1378	0	1	134	133.856	45	2	60	0	1	0	0	0	0	0	0	2	1	3	5	0	0	0	2	1	0	0	0	4.7	100	22	91	1.1		56	1	0
326	1393	0	1393	0	1020	1	0	141	140.904	50	1	68.9	0	1	0	0	0	0	0	0	4	0	3	2	0	0	1	2	1	0	0	0	4.8	110	20	94	1.9	36.8	64	0	0
327	1312	0	1312	0	1312	0	0	138	137.936	46	1	63	1	1	0	0	0	0	0	0	2	1	3	7	0	0	1	2	1	0	0	0	4.2	104	23	96	0.9		51	1	0
328	1389	0	1389	0	1389	0	0	143	142.952	59	1	64.5	0	1	0	0	0	0	0	0	2	0	3	4	0	0	1	2	0	0	0	0	4.4	113	21	97	1.2	65.3		0
329	1349	0	1349	0	1349	0	0	142	141.808	66	1	59.3	1	1	1	1	0	0	0	0	2	0	1	3	0	0	1	2	1	0	0	0	5.1	109	20	88	1.6	47.6	44	0
330	1398	0	1398	0	1398	0	0	140	139.808	68	1	71.6	1	1	0	1	0	1	0	0	3	0	3	0	0	0	1	2	1	0	0	0	5	114	16	88	1.6	45.7	52	0	0
331	1339	0	1339	0	7	1	0	137	138.456	47	1	68	0	1	0	0	0	0	0	0	4	1	3	7	0	0	1	2	1	0	0	0	4.7	111	16	191	1.6		72	0	0
332	928	1	928	0	928	0	0	142	142.256	51	1	66.2	1	1	0	0	1	0	1	0	2	0	3	4	0	0	1	2	1	1	0	1	4.5	108	26	116	1	72.8	45	0	0
333	1353	0	1353	0	1353	0	0	145	144.76	61	2	46.4	0	1	0	0	0	1	0	0	4	0	2	4	0	0	1	2	1	0	0	0	4.4	107	27	85	0.9	65.2	57	0
334	1392	0	1392	0	1392	0	0	140	139.632	45	2	43.9	1	1	0	0	0	0	0	0	2	0	2	4	0	0	1	1	1	0	0	0	4.1	107	24	77	1	68.6		0	0
335	1379	0	1379	0	8	1	0	142	141.888	54	2	62.8	0	1	0	0	0	0	0	0	2	0	2	4	0	0	1	1	1	1	0	0	3.9	106	23	93	0.8	64.5	57	0	0
336	1362	0	1362	0	1362	0	0	140	140.08	32	2	52.6	0	1	0	0	0	0	0	0	2	0	1	3	0	0	1	2	1	0	0	0	4.8	108	30	105	1	61.9	68	0	0
337	1329	0	1329	0	1329	0	0	139	138.696	36	1	66	0	1	0	0	0	0	0	0	4	0	3	2	0	0	1	1	1	0	0	0	4	107	24	81	1.6	47.2	65	0	0
338	1373	0	1373	0	1373	0	0	141	140.76	55	2	53	0	1	0	0	0	0	0	0	3	1	1	5	0	0	0	1	1	0	0	0	4.2	108	25	85	0.7		56		0
339	1354	0	1354	0	1354	0	0	140	139.952	38	1	67.8	1	1	0	0	0	0	0	0	4	0	3	3	0	0	1	2	1	0	0	0	4.8	103	27	97	1.1	68.2		0	0
340	1330	0	1330	0	897	1	0	140	139.856	44	1	54.9	0	1	0	0	0	0	0	0	1	0	3	6	0	0	1	2	1	0	0	0	4.9	105	28	91	1.2	68.1	64	0	0
341	1348	0	1348	0	1348	0	0	142	141.84	20	1	60.2	0	0	0	0	0	0	0	0	2	0	2	3	0	0	1	2	1	0	0	0	4.5	108	23	90	1.1	87.2	63	1	0
342	1350	0	1350	0	363	1	0	141	143.208	49	1	71.4	0	1	1	0	0	0	0	0	2	0	3	3	0	0	1	2	1	0	0	0	5.6	106	24	238	1.5	52.2	58	0	0
343	1305	0	1305	0	1305	0	0	142	142.24	48	1	62.6	0	1	0	0	1	0	0	0	2	0	3	5	0	0	1	2	1	0	0	0	4.6	108	23	115	1.4	57.6	70	0	0
344	1363	0	1363	0	1363	0	0	141	141.064	53	1	70.1	0	1	0	1	0	0	0	0	2	0	3	6	0	0	1	2	1	0	0	0	4.7	108	27	104	1.6	46.7	66	0	0
345	1334	0	1334	0	1334	0	0	140	139.792	30	2	46.7	0	1	0	0	0	0	0	0	2	0	1	3	0	0	1	2	1	0	0	0	3.6	105	28	87	1.1	69.3	54	0	1
346	1350	0	1350	0	10	1	0	143	142.872	31	1	49	0	1	0	0	0	0	0	0	3	1	3	7	1	0	1	2	1	0	0	0	4.4	107	27	92	1.4		70	1	0
347	1259	0	1259	0	1259	0	0	143	143.272	49	1	60.4	0	1	0	0	0	0	0	0	2	0	1	4	0	0	1	2	1	0	0	0	4.5	109	27	117	1.4	64.2	56	0	0
348	1327	0	1327	0	1327	0	0	142	141.76	48	2	45	0	1	0	0	0	0	0	0	2	0	1	0	0	0	1	2	1	0	0	0	4.8	107	26	85	1	63	57	0	0
349	1327	0	1327	0	21	1	0	140	139.824	59	1	68.3	0	1	1	0	0	0	0	0	1	0	3	4	0	0	1	2	1	0	0	0	5.1	106	26	89	1.7	42.7	55	0	0
350	1282	0	1282	0	1282	0	0	140	140.816	37	1	67.5	1	1	0	0	0	0	0	0	2	0	3	3	0	0	1	2	1	0	0	0	4.7	103	26	151	4.2	28.6		0	0
351	1289	0	1289	0	1289	0	0	140	140.336	50	1	75	1	1	0	0	0	0	0	0	2	1	1	3	0	0	1	2	1	0	0	0	3.8	106	24	121	1		66	0	0
352	1284	0	1284	0	1284	0	0	141	141.176	50	1	60.7	0	1	1	0	1	0	0	0	1	1	1	3	1	0	1	2	1	0	0	0	4.9	112	20	111	0.9		36	0	0
353	1280	0	1280	0	138	1	0	139	138.76	48	1	57.4	0	0	0	1	0	0	0	1	4	1	3	7	0	0	1	2	1	0	0	0	5.1	114	18	85	2.4		63	0	0
354	1301	0	1301	0	1301	0	0	138	137.952	53	1	81.9	0	1	0	0	0	0	0	0	2	0	3	2	0	0	1	2	1	0	0	0	4.9	109	20	97	2.2	36.3	54	0	0
355	1272	0	1272	0	1272	0	0	140	139.904	21	1	42.9	0	1	0	0	0	0	0	0	3	1	3	7	0	0	1	2	0	0	0	0	4.8	109	20	94	1.5		59.4	0	0
356	1252	0	1252	0	1252	0	0	141	140.76	27	2	55.7	0	1	0	0	0	0	0	0	3	0	1	3	0	0	1	1	0	0	0	0	4.5	106	25	85	1.1	61.5	57	0	0
357	1294	0	1294	0	1294	0	0	137	138.744	64	2	50	0	1	1	1	0	0	0	0	1	0	2	4	0	0	1	2	1	0	0	0	5.2	105	23	209	0.8	79.2	47	0	0
358	1270	0	1270	0	1270	0	0	141	141.096	43	2	52.7	0	1	0	1	0	0	0	0	4	0	3	3	1	0	1	2	1	0	0	0	3.8	108	22	106	1	87.1		1	0
359	1286	0	1286	0	8	1	0	143	142.456	53	2	69	1	1	0	0	0	0	0	0	3	0	3	4	0	0	1	2	1	0	0	0	3.9	109	26	66	1.1	66.3		0	0
360	1288	0	1288	0	1288	0	0	144	143.744	54	1	79	0	1	0	0	0	0	0	0	3	0	3	2	0	0	1	1	1	0	0	0	4	109	27	84	1.4	54.4	63	0	0
361	1285	0	1285	0	1285	0	0	141	141.32	54	1	58.6	0	1	1	0	0	0	0	0	1	0	2	5	0	1	1	2	1	0	0	0	5.6	104	31	120	1.5	51.5	44	1	0
362	1271	0	1271	0	1271	0	0	138	137.856	54	1	57.5	0	1	0	0	0	0	0	0	2	0	3	4	0	0	1	2	1	0	0	0	4.9	105	25	91	1.7	46.2	60	0	0
363	1294	0	1294	0	1294	0	0	144	143.696	50	2	49.2	0	1	0	0	0	0	0	0	4	0	1	3	0	0	1	1	1	0	0	0	3.7	104	29	81	1	64.7	62	0	0
364	1291	0	1291	0	1291	0	0	143	142.84	60	1	72.5	0	1	1	1	0	0	0	0	1	0	3	5	0	0	1	2	1	0	0	1	5.1	109	23	90	1.3	53.3	12	1
365	1233	0	1233	0	1233	0	0	141	141	34	1	73.2	1	1	0	0	0	0	0	0	3	0	1	2	0	0	1	2	1	0	0	0	4	105	27	100	1.2	76.7	63	0	0
366	1271	0	1271	0	1271	0	0	142	141.792	45	1	74.1	0	1	1	0	1	0	0	0	2	0	2	5	0	0	1	2	0	0	0	0	4.4	106	27	87	1.2		68	0	0
367	1260	0	1260	0	1260	0	0	140	139.872	54	1	63.2	0	1	0	0	0	0	0	0	4	1	3	0	1	0	1	2	1	0	0	0	4.3	108	23	92	1.1		56	0	0
368	1272	0	1272	0	1272	0	0	145	144.776	31	1	72	1	0	0	0	0	0	0	0	3	0	3	3	0	0	1	1	1	0	0	0	4.5	112	25	86	1	96.1		0	0
369	1266	0	1266	0	8	1	0	145	144.84	63	2	56.4	0	1	0	0	0	0	1	0	3	0	3	2	0	0	1	2	1	0	0	0	4.8	109	27	90	1.2	49.7			0
370	1277	0	1277	0	1277	0	0	136	135.792	38	2	42.1	0	1	0	0	0	0	0	0	3	0	1	0	0	0	0	2	1	0	0	0	4.4	104	24	87	0.8	92.1	58	0	0
371	1264	0	1264	0	12	1	0	142	142.08	50	1	62.9	0	1	0	1	0	0	0	0	3	0	2	3	0	1	1	2	1	0	0	0	4	107	27	105	1.5	52.3	55	0	0
372	1263	0	1263	0	1263	0	0	137	136.92	51	2	56.7	0	1	1	0	0	0	0	0	3	0	3	0	0	0	1	2	1	0	0	0	4.1	106	20	95	1.3	47.2	65	0	0
373	1231	0	1231	0	1231	0	0	140	140.368	63	2	51.3	0	1	1	0	0	0	0	0	1	0	2	3	0	0	1	2	1	0	0	0	4.9	103	27	123	1	61.7	61	0	0
374	1254	0	1254	0	1254	0	0	145	144.856	62	1	67.9	0	1	0	0	0	0	0	0	2	0	2	4	0	0	1	2	1	0	0	0	4.5	108	26	91	1	81.5	74	0	0
375	1253	0	1253	0	1253	0	0	142	141.936	30	1	63.8	1	0	0	0	0	0	0	0	2	0	3	3	0	0	1	2	1	0	0	0	5.2	113	20	96	2.3	36.6	51	0	0
376	1214	0	1214	0	1214	0	0	142	141.872	36	2	46	0	0	0	0	0	0	0	0	4	0	3	0	0	0	1	2	1	0	0	0	4.7	111	22	92	1.4	55.2	52	0	0
377	1235	0	1235	0	1235	0	0	143	142.872	54	2	64	0	0	0	0	0	0	0	0	2	0	3	0	0	0	1	2	1	0	0	0	4.7	108	28	92	1.4	42.8	66	0	0
378	1236	0	1236	0	1236	0	0	141	140.648	59	1	74.4	1	1	0	0	0	0	0	0	4	0	2	5	0	0	1	2	1	0	0	0	4.8	111	21	78	1.5	61.2	60	0	0
379	1240	0	1240	0	1240	0	0	144	143.744	52	2	57.9	0	1	0	0	0	0	0	0	2	0	3	4	0	0	1	2	1	0	0	0	4.4	104	29	84	1.2	52.8	66	0	0
380	1233	0	1233	0	1233	0	0	139	138.728	38	1	51.9	0	1	1	0	0	0	0	0	1	0	3	3	0	0	1	2	1	0	0	0	4.8	108	23	83	0.9	87	68	0	0
381	1204	0	1204	0	8	1	0	140	140.576	66	2	52.8	0	1	0	0	0	0	0	0	4	0	1	3	1	0	1	2	1	0	0	0	4.7	108	21	136	0.8	83.6	62	1	0
382	1222	0	1222	0	1222	0	0	141	140.92	39	1	75.9	0	1	0	0	0	0	0	0	2	0	1	4	0	0	1	2	1	0	0	0	4.5	110	27	95	1	87.5	55	0	0
383	1215	0	1215	0	1215	0	0	143	142.968	22	1	64.4	0	1	0	0	0	0	0	0	3	0	1	2	0	0	1	1	1	0	0	0	3.8	105	21	98	1.7	49.5		1	0
384	398	0	398	1	55	1	0	143	142.792	32	1	60.4	1	1	0	0	0	0	0	0	2	0	3	0	0	0	1	2	1	0	0	0	4.1	106	17	87	2.4	33.7	58	1	0
385	1208	0	1208	0	1208	0	0	141	140.728	43	1	77.1	0	1	0	0	0	0	0	0	2	0	2	2	0	0	0	1	1	0	0	0	4.3	104	28	83	1.4	58.9	63	0	0
386	1208	0	1208	0	1208	0	0	139	138.76	31	1	66.5	0	1	0	0	0	0	0	0	2	0	1	3	0	0	1	2	1	0	0	0	4	104	26	85	1.4	53.9	53	0	0
387	1206	0	1206	0	10	1	0	138	139.632	57	1	62.8	0	1	1	0	0	0	0	0	1	0	3	0	0	0	1	2	1	0	0	0	5.4	111	19	202	2	36.8	63	0	0
388	639	1	639	0	191	1	0	135	137.544	60	1	65.4	1	1	1	1	0	0	0	0	1	0	3	5	0	0	1	2	1	0	0	0	4.8	104	24	259	2.3	31.5	52	0	0
389	1205	0	1205	0	1205	0	0	142	142.208	28	1	72.1	0	1	0	0	0	0	0	0	2	0	3	2	0	0	1	2	1	0	0	0	4.4	106	24	113	1.4	63.7		0	0
390	1201	0	1201	0	225	1	0	142	141.76	50	1	68.8	1	1	0	0	0	0	0	0	3	0	2	6	0	0	1	1	1	0	0	0	4.5	109	25	85	1.2	66.3	59	0	0
391	1200	0	1200	0	1200	0	0	138	137.904	35	2	52.2	0	1	0	0	0	0	0	0	2	0	3	3	0	0	1	2	1	0	0	0	4.4	106	24	94	1.1	60.2	61	1	0
392	1198	0	1198	0	1198	0	0	144	144.144	42	1	67.8	1	1	0	0	0	0	0	0	2	0	3	3	0	0	1	2	1	0	0	0	4.5	107	29	109	1.5	55.1	73	0	0
393	1198	0	1198	0	1198	0	0	139	138.904	30	1	61	0	1	0	0	0	0	0	0	4	0	3	3	0	0	1	2	0	0	0	0	4	106	25	94	1.5	58.1		0	0
394	1086	0	1086	0	1086	0	0	143	143.032	42	1	63	0	0	0	1	0	0	0	0	2	1	3	7	0	0	1	2	1	0	0	0	3.4	101	29	102	1.8		56	0	0
395	1194	0	1194	0	1194	0	0	141	140.792	20	2	61.1	0	1	0	0	0	0	0	0	2	0	1	3	0	0	1	2	1	0	0	0	4.3	106	25	87	1.1	64.7		0	0
396	1194	0	1194	0	1194	0	0	139	138.84	22	1	54.7	0	1	0	0	0	0	0	0	2	0	1	2	0	0	1	2	1	0	0	0	4	107	16	90	2.2	50.8	58	0	0
397	1191	0	1191	0	1191	0	0	141	140.856	40	1	74	1	0	0	0	0	0	0	0	4	0	3	2	0	0	1	2	1	0	0	0	4.3	111	20	91	2	40.8		0	0
398	1187	0	1187	0	1187	0	0	137	137.608	40	2	68.8	0	1	1	0	0	0	0	0	1	0	2	5	0	0	1	2	1	0	0	0	4.5	107	21	138	1.2	52	62	0	0
399	365	1	352	1	175	1	0	141	140.536	63	1	65	0	1	1	1	0	0	0	0	1	0	3	2	0	0	1	2	1	0	0	0	6.2	115	17	71	1.4	54	39	0	0
400	1173	0	1173	0	1173	0	0	144	143.76	57	2	48.4	0	0	0	0	0	0	0	0	3	0	1	3	0	0	1	2	1	0	0	0	3.7	108	27	85	0.9	73.4	61	0	0
401	1170	0	1170	0	9	1	0	145	144.84	49	2	66.5	0	1	1	0	0	0	0	0	4	0	3	4	1	0	1	2	1	0	0	0	4.2	110	27	90	1.5	46.8	56	1
402	1171	0	1171	0	1171	0	0	144	143.776	65	2	59.2	0	1	0	0	0	0	0	0	3	0	3	2	0	0	1	2	1	0	0	0	4.3	109	24	86	1.4	40.8	61
403	1171	0	1171	0	1171	0	0	142	141.952	69	1	75.8	0	1	1	0	0	0	1	0	1	0	3	6	0	0	1	2	1	0	0	0	4.6	106	29	97	1.4	54.8	69		0
404	1129	0	1129	0	1129	0	0	139	139.336	60	2	61.4	0	1	0	1	0	0	0	0	4	0	3	4	0	0	1	2	1	0	0	0	3.5	97	29	121	1.5	39.8	71
405	1166	0	1166	0	1166	0	0	141	140.824	51	1	69.1	0	1	0	0	0	0	0	0	3	0	2	6	0	0	1	1	1	0	0	0	3.7	104	29	89	1.6	52.1		0	0
406	1166	0	1166	0	1166	0	0	141	140.968	48	1	62.4	0	1	1	0	0	0	0	0	1	0	2	3	0	0	1	2	1	0	0	0	4.4	105	25	98	1.6	50.1	63	0	0
407	1160	0	1160	0	1160	0	0	139	138.872	31	1	65.2	0	1	0	0	0	0	0	0	3	0	3	3	0	0	1	2	1	0	0	0	4.8	110	21	92	1.3	71.1		0	0
408	1158	0	1158	0	1158	0	0	140	140.272	39	1	65.5	0	1	0	1	0	0	0	0	2	0	3	0	0	0	1	2	1	0	0	0	4	106	23	117	1.5	54.6	58	0	0
409	1158	0	1158	0	1158	0	0	143	142.584	33	1	45.9	0	1	1	0	0	0	0	0	2	0	1	1	0	0	1	2	1	0	0	0	3.9	107	25	74	0.9	99.6	52	0	0
410	1152	0	1152	0	1152	0	0	141	140.744	27	1	58.4	0	1	0	0	0	0	0	0	2	0	1	2	0	0	1	2	1	0	0	0	4.1	104	28	84	1.4	64.7	69	0	0
411	1148	0	1148	0	87	1	1	134	133.824	51	2	54.7	0	1	0	1	0	0	0	0	2	1	3	4	0	0	1	2	1	0	0	0	4.3	105	24	89	0.9		49	0	0
412	1147	0	1147	0	169	1	0	144	143.968	49	2	55	1	1	0	0	0	0	0	0	2	0	3	5	0	0	1	1	1	0	0	0	4.1	111	23	98	2	32.2		0
413	1126	0	1126	0	1126	0	0	140	140.432	61	1	69.3	0	1	1	0	0	0	0	0	2	0	1	3	0	0	1	2	1	0	0	0	3.9	103	29	127	1	79	62		0
414	1145	0	1145	0	1145	0	0	142	141.808	48	1	62.5	0	1	0	0	0	0	0	0	2	0	1	2	0	0	1	2	1	0	0	0	4.7	107	27	88	1.7	47.3	64	0	0
415	1141	0	1141	0	1141	0	0	141	141.24	63	1	71	0	1	0	1	0	0	0	0	2	0	3	4	0	0	1	2	1	0	1	0	4.6	106	27	115	1.2	63.3	65		0
416	1139	0	1139	0	1139	0	0	140	139.952	53	1	61.1	0	1	0	0	0	0	0	0	2	0	3	4	0	0	1	2	1	0	0	0	4.6	109	24	97	1	80.4	60	0	0
417	1131	0	1131	0	1131	0	0	139	138.744	39	2	51.5	0	1	0	0	0	0	0	0	4	0	2	4	0	0	1	2	1	0	0	0	3.9	106	25	84	1	65	57	0	0
418	1126	0	1126	0	1126	0	0	140	139.936	60	2	49.9	0	1	0	1	0	0	0	0	2	0	2	3	1	0	1	2	1	0	0	0	4.5	105	25	96	0.8	77.9	63	1	0
419	1126	0	1126	0	1126	0	0	143	143.048	63	1	62.7	0	1	1	0	0	1	0	0	1	0	2	5	0	0	1	2	1	0	0	0	4.7	108	24	103	1.7	49.6	53		0
420	1124	0	1124	0	1124	0	0	141	141.112	45	1	59.6	0	1	0	0	0	0	0	0	3	0	3	0	0	0	1	2	1	0	0	0	4.4	103	28	107	1.8	41	66	0	1
421	151	1	142	1	11	1	0	141	140.824	59	1	68	1	1	1	1	0	0	0	0	1	0	3	3	0	0	1	2	0	0	0	0	4.5	106	23	89	1.3	60.2	67	0
422	1098	0	1098	0	1098	0	1	134	134.992	67	2	58.9	0	1	1	1	0	0	0	0	1	0	1	3	0	0	1	2	1	0	0	0	4.8	102	21	162	1.2	46.8	57	0	1
423	1117	0	1117	0	1117	0	0	144	143.552	51	2	58	0	1	1	0	0	0	0	0	1	0	2	3	0	0	1	2	1	0	0	0	4.3	105	28	72	1	64.5	55	0	0
424	1116	0	1116	0	1116	0	0	139	138.856	37	2	50	0	1	0	0	0	0	0	0	3	0	1	0	0	0	1	2	1	0	0	0	4.5	106	25	91	1	64.2	65	0	0
425	1110	0	1110	0	1110	0	0	139	138.696	41	2	56.2	0	1	0	0	0	0	0	0	2	0	2	3	0	0	0	2	1	0	0	0	3.8	107	25	81	0.9	77.4	63	0	0
426	1107	0	1107	0	1107	0	0	144	143.52	39	2	47	0	1	0	0	0	0	0	0	2	0	3	3	0	0	1	2	1	0	0	0	3.9	112	27	70	1.1	62.1	52	0	0
427	1107	0	1107	0	1107	0	0	140	139.968	32	1	79.3	0	1	0	0	0	0	0	0	2	0	3	6	0	0	1	2	1	0	0	0	4.2	107	24	98	1.6	52.1		0	0
428	1103	0	1103	0	1103	0	0	139	138.776	34	2	53.4	0	1	0	0	0	0	0	0	4	0	1	0	0	0	0	2	1	0	0	0	4.5	104	27	86	1.2	58.1	63	1	0
429	1071	0	1071	0	44	1	0	142	142.112	62	1	57	0	1	1	0	0	0	0	0	1	0	2	5	0	1	1	2	1	0	0	0	5.1	106	27	107	1.4	56.1	57	0	0
430	1102	0	1102	0	1102	0	0	144	143.472	26	1	55	0	1	0	0	0	0	0	0	2	0	1	4	0	0	1	2	1	0	0	0	4.4	109	24	67	1.5	61.6		0	0
431	263	1	263	0	263	0	0	140	139.984	48	2	59.4	0	1	0	1	0	0	0	0	3	0	3	4	0	0	1	2	1	0	0	0	3.3	106	27	99	1.2	49.6	60		0
432	1093	0	1093	0	1093	0	0	140	142.992	48	1	64	1	1	1	0	0	0	0	0	1	0	3	3	0	0	1	2	1	0	0	0	4.2	101	28	287	0.9	91.2	55	0	0
433	1089	0	1089	0	8	1	0	140	139.92	52	2	51.7	0	1	0	0	0	0	0	0	3	0	2	3	0	0	1	2	1	0	0	0	5	105	27	95	1	60.6	73	0	0
434	1091	0	1091	0	1091	0	0	139	139.224	49	1	64	0	1	1	0	0	0	0	0	2	1	1	7	0	0	1	2	1	0	0	0	4.8	104	27	114	0.9		58		0
435	1088	0	1088	0	15	1	0	138	138.368	42	1	68.4	1	1	0	0	0	0	0	0	3	0	1	6	1	0	1	2	1	0	0	0	3.8	101	26	123	1.4	57.7	64	0	0
436	1082	0	1082	0	1082	0	0	140	140	58	1	60.3	1	1	0	0	0	0	0	0	3	0	2	4	0	1	1	2	1	0	0	0	4.8	110	22	100	1.3	55.4	63	0	0
437	553	0	553	1	7	1	0	139	139.256	35	1	79.2	1	1	1	0	0	0	0	0	1	0	2	3	0	0	1	1	1	0	0	0	4.9	104	23	116	1.8	78.6	67	0	0
438	1081	0	1081	0	531	1	0	142	141.936	47	1	75.8	1	1	0	0	0	0	0	0	3	0	1	2	1	0	1	1	1	0	0	0	5	104	27	96	1.3	62.4	61	0	0
439	1079	0	1079	0	538	1	0	144	143.68	38	1	53.7	1	1	0	0	0	0	0	0	2	0	3	3	0	0	1	2	1	0	0	0	4.4	106	30	80	1.3	67	70	0	0
440	1069	0	1069	0	1069	0	0	144	143.872	62	1	56	0	1	0	0	0	0	0	0	3	0	3	0	0	0	1	2	1	0	0	0	4.2	106	29	92	1.3	67.9	66		0
441	1075	0	1075	0	1075	0	0	141	140.904	34	2	50.3	0	1	0	0	0	1	0	0	3	0	2	3	0	0	1	2	1	0	0	0	4.1	108	25	94	0.9	77.3	59	0	0
442	1075	0	1075	0	1075	0	0	139	138.984	57	1	54.5	0	1	0	0	0	0	0	0	2	1	3	7	0	0	1	2	1	0	0	0	4.7	103	25	99	1.1		57	0	0
443	1075	0	1075	0	1075	0	0	140	139.888	43	1	52	0	1	0	0	0	0	0	0	2	1	3	7	0	0	1	2	1	0	0	0	4.8	103	21	93	1.1		64	0	0
444	1074	0	1074	0	1074	0	0	141	140.904	21	2	65.2	0	1	0	0	0	0	0	0	4	0	1	2	0	0	1	2	1	0	0	0	4.2	107	27	94	1.2	63.4	57	0	0
445	1068	0	1068	0	533	1	0	139	139.016	37	1	73.4	1	1	0	0	0	0	0	0	4	0	1	3	0	0	1	1	1	0	0	0	4.2	104	27	101	1.3	67.3	54	0	0
446	1048	0	1048	0	68	1	0	138	139.712	60	1	64	1	1	0	0	0	0	0	0	3	0	2	4	0	0	1	2	1	0	0	0	4.9	103	23	207	1.8	46.5	79	0	0
447	1062	0	1062	0	1062	0	0	142	142.112	40	1	61.2	1	1	0	0	0	0	0	0	3	1	3	7	1	0	1	2	1	0	0	0	4.8	106	27	107	1.3		60	0	0
448	5121	0	5121	0	5121	0	0	141	140.344	52	1	69	0	1	1	1	0	0	0	0	1	0	3	2	0	0	1	2	1	0	0	0	4.5	103	29.5	59	2.5	29			0
449	4870	0	4870	0	4870	0	0	137	137.496	27	1	69	0	1	0	0	0	0	0	0	4	0	3	4	0	0	1	2	1	0	0	0	4.2	105	22.1	131	2	42.9	73.83	0	0
450	5079	0	5079	0	5079	0	0	142	141.936	52	2	47	0	1	0	0	0	0	0	0	2	0	1	3	0	0	0	2	1	0	0	0	4.1	104	28.1	96	0.7	93.5	65.56	0	1
451	4602	0	4320	1	4320	0	1	133	133.208	26	1	56	0	1	0	0	0	0	0	0	4	0	3	3	0	0	1	1	1	0	0	0	3.2	100	25.5	113	1.1	86.1	39.35	0	1
452	4845	0	4845	0	4845	0	0	139	138.68	53	1	70	0	1	1	0	0	0	0	0	1	0	3	5	0	0	1	1	1	0	0	0	3.7	107		80	1	83.2	65.98	0
453	5103	0	5103	0	5103	0	0	139	138.824	24	1	54	0	1	0	0	0	0	0	0	4	0	1	1	0	0	0	1	1	0	0	0	3.8	104	22	89	1.2	79.2	59.35	0	1
454	5106	0	5106	0	345	1	0	137	136.936	56	1	71	0	0	0	0	0	0	1	0	4	0	2	4	0	0	0	1	1	0	0	0	3.5	102	23	96	1.4	55.8	53.64	0	0
455	3935	0	3935	0	3935	0	0	139	138.552	33	2	49	0	1	0	0	0	0	1	0	4	0	1	6	0	0	0	1	1	0	0	0	4.1	102	31	72	1.1	60.9	66.07	0	0
456	5070	0	5070	0	5070	0	0	138	137.952	41	1	55	1	1	0	0	0	0	0	0	4	0	1	4	0	0	0	1	1	0	0	0	3.6	103	23.4	97	1.2	71	62.7	1	1
457	401	0	401	0	401	0	1	130	129.904	24	1	69	0	1	0	0	0	0	0	0	4	0	3	6	0	0	1	1	1	0	0	0	3.4	87	28.4	94	2.1	41.5	48.37	1	1
458	5073	0	5073	0	5073	0	0	140	139.984	43	1	53	0	1	0	0	0	0	0	0	2	0	1	0	0	0	0	1	1	0	0	0	4.6	100	20.9	99	1.1	77.8	65.52	1	0
459	5058	0	5058	0	1185	1	0	140	139.808	32	1	51	0	1	0	0	0	0	0	0	4	0	1	1	0	0	0	1	1	0	0	0	4.2	99	28.3	88	0.8	119.3	65.65	0	0
460	5067	0	5067	0	5067	0	0	144	144.208	54	1	72	0	1	0	0	0	0	0	0	3	0	1	5	0	0	1	1	1	0	0	0	4.6	101	28.7	113	1.3	61.2	55.56	1	0
461	726	0	720	1	540	1	0	139	139.816	37	1		1	1	0	0	0	0	0	0	4	0	2	5	0	0	0	1	1	0	0	0	3.9	105	26.2	151	1.1	80.2	54.9	0
462	2007	1	1980	1	1	1	0	132	135.856	57	1	61	0	0	1	0	0	0	0	0	1	0	3	2	0	0	1	2	1	0	0	0	5	98	25.6	341	1.3	60.6	37.95	1	0
463	4962	0	4962	0	4962	0	0	138	137.952	33	2	48	0	0	0	0	0	0	0	0	4	0	1	3	0	0	0	1	1	0	0	0	4.2	106	27	97	1	68	69.35	1	0
464	4995	0	4995	0	4995	0	1	135	134.792	34	2	47	0	1	0	0	0	0	0	0	4	0	1	5	0	0	0	1	1	0	0	0	4	101	25.5	87	0.8	87.4	57.95	1	0
465	4175	0	4170	1	2301	1	0	137	136.968	45	2	42	0	1	0	0	0	0	0	0	2	0	1	3	0	0	0	2	1	0	0	0	4.4	109	22	98	1.7	34.6	65.62	0	0
466	4974	0	4974	0	4974	0	1	135	134.952	28	1	45	0	1	0	0	0	0	0	0	4	0	1	3	0	0	0	1	1	0	0	0	4.3	102	24	97	1.2	76.7	46.15	0	0
467	4983	0	4983	0	4983	0	0	137	136.744	42	2	41	0	1	0	0	0	0	0	0	2	0	2	5	0	0	0	1	1	0	0	0	3.4	103	25	84	0.9	73.1	55.36	1	0
468	4740	0	4740	0	4740	0	0	138	138.176	43	1	43	0	0	1	0	0	0	0	0	1	0	1	1	0	0	0	1	1	0	0	0	3.6	106	24	111	0.8	112.3	62.3	0
469	3393	1	3393	0	2970	1	1	134	134.768	40	1	66	1	1	0	0	0	0	0	0	4	0	1	7	0	0	0	2	1	0	0	0	5.7	102	27	148	1.2	71.4	58.29	0
470	4968	0	4968	0	4968	0	0	136	136.016	37	1		0	1	0	0	0	0	0	0	4	0	1	4	0	0	0	1	1	0	0	0	4	101	28	101	0.9	101.1	57.41	0	0
471	4654	0	4654	0	4654	0	0	137	139	43	1	62	0	1	1	0	0	0	1	0	1	0	2	4	0	0	0	1	1	0	0	0	4.2	100	27	225	1.3	64.1	60.29	1
472	220	1	150	1	167	0	1	133	133.56	55	1		0	1	0	0	0	0	1	0	4	0	1	7	0	0	0	1	1	0	0	0	3.9	98	25.1	135	0.9	93.3	65.17	0
473	396	0	396	0	396	0	0	137	137.816	33	1	57	1	1	0	0	0	0	0	0	4	0	1	1	0	0	0	1	1	0	0	0	3.9	105	28.6	151	0.9	103.5	45.93	0	0
474	4908	0	4908	0	4908	0	0	138	141.472	48	1	68	0	1	0	0	0	0	0	0	4	1	2	2	0	0	0	1	1	0	0	0	4	102	27.8	317			64	1	0
475	4920	0	4920	0	75	1	0	133	135.752	39	2	58	0	1	0	0	0	0	0	0	4	0	3	3	0	0	1	2	1	0	0	0	5.4	102	25	272			57.14	0
476	3420	0	3420	1	762	1	0	137	136.776	43	2	49	0	1	0	0	0	0	1	0	4	0	2	2	0	0	0	1	1	0	0	0	4.6	104	27	86	1.4	43.7		0
477	4809	0	4809	0	150	1	0	136	137.296	25	1	62	1	0	0	0	0	0	0	0	4	0	1	3	0	0	0	1	1	0	0	0	4.5	106	22.4	181			64.6	0	0
478	4818	0	4818	0	4818	0	0	138	138.08	34	1	70	1	1	0	0	0	0	0	0	4	0	2	3	0	0	1	2	1	0	0	0	4.2	104	28	105	1.1	81.6	41.53	0
479	1821	0	1821	0	1821	0	1	129	129.688	28	1	55	0	1	0	0	0	0	0	0	4	0	2	1	0	0	0	1	1	0	0	0	3.7	101	21.3	143	0.9	107	64.57	1
480	4797	0	4797	0	4797	0	0	143	142.84	47	1	67	0	1	0	0	0	0	0	0	3	0	2	6	0	0	0	1	1	0	0	0	4.3	108	28	90	1	85.3	62.32	0	1
481	4725	0	4725	0	600	1	0	137	136.552	36	2	56	0	0	0	0	0	0	0	0	4	0	1	4	0	0	0	1	1	0	0	0	3.4	100	28	72	1.1	59.8	69.44	0
482	4743	0	4743	0	4743	0	1	129	129.208	40	2	52	0	1	0	0	0	0	0	0	4	0	1	1	0	0	0	1	1	0	0	0	3.2	96	26.8	113	0.9	73.8	69.32	0
483	4773	0	4773	0	4773	0	0	138	138.336	27	1		0	1	0	0	0	0	0	0	4	0	1	3	0	0	0	1	1	0	0	0	3.4	98	25	121	1	95.4	57.46	0	1
484	3712	0	3600	1	132	1	0	142	142.32	50	1	80	0	1	1	1	0	0	0	0	4	0	2	4	0	0	0	2	1	0	0	0	3.5	107	25	120	0.8	108.9	61.98	1	0
485	4740	0	4740	0	4740	0	1	134	134.208	37	1	67	1	1	0	0	0	0	1	0	3	0	1	1	0	0	0	1	1	0	0	0	4.7	108	19.9	113	0.7	135.1	61.11	0	0
486	4749	0	4749	0	4749	0	0	141	141	44	2	58	0	1	0	0	0	0	0	0	4	0	1	1	0	0	0	1	1	0	0	0	3.5	111	17.2	100	1.2	52	70.63	0
487	4758	0	4758	0	810	1	0	138	138.144	27	1	61	0	0	0	0	0	0	1	0	4	0	1	3	0	0	0	1	1	0	0	0	4.1	101	28	109	1	95.4	66.95	0	0
488	4758	0	4758	0	4758	0	0	137	136.856	30	1	59	0	1	0	0	0	0	0	0	4	0	1	4	0	0	0	1	1	0	0	0	4.4	100	32	91	0.9	105.5	55	0	0
489	4686	0	4686	0	4686	0	0	138	138.56	53	1	62	0	1	0	0	0	0	0	0	4	0	1	1	0	0	0	1	1	0	0	0	3.9	106	28.1	135	1	83.2	50	1	0
490	4737	0	4737	0	4737	0	0	142	142.48	51	1	62	0	1	0	0	0	0	0	0	4	0	1	3	0	0	0	1	1	0	0	0	4.4	108	18	130	0.8	108.5	66.04	0	0
491	3423	1	3420	1	1293	1	0	139	140.136	50	1	74	0	1	0	0	0	0	0	0	4	0	2	1	0	0	0	2	1	0	0	0	4.2	102	25	171	1.2	68.2	59.79	0	0
492	4737	0	4737	0	4737	0	0	142	141.808	28	1	60	0	1	0	0	0	0	1	0	2	0	1	2	0	0	0	1	1	0	0	0	4	104	30.1	88			60.12	0	0
493	4104	0	4104	0	4104	0	0	143	143.192	39	1	58	0	1	0	0	0	0	0	0	2	1	1	5	0	0	0	2	1	0	0	0	3.7	105	26.9	112			60.22	1	0
494	2124	0	2124	0	2124	0	0	139	139.128	26	1	64	0	1	0	0	0	0	0	0	4	0	1	2	0	0	0	1	1	0	0	0	4	103	26.4	108	1.2	77.9	58.16	1
495	1953	0	1953	0	1953	0	0	135	136.008	26	1	60	0	1	0	0	0	0	0	0	4	0	1	2	0	0	0	1	1	0	0	0	4.7	95	30.9	163	1.2	77.9	55.94	0
496	2629	0	2610	1	2629	0	0	142	141.696	24	1	63	0	1	0	0	0	0	0	0	2	0	1	3	0	0	0	2	1	0	0	0	4.8	105	27	81	1.5	61.2	68.15	1	0
497	4722	0	4722	0	4722	0	0	139	138.92	28	2	54	0	1	0	0	0	0	0	0	4	0	2	5	0	0	0	2	1	0	0	0	4.2	106	26.4	95	0.8	90.9	61.11	0
498	4725	0	4725	0	4725	0	0	141	140.584	36	2	55	0	0	0	0	0	0	0	0	4	0	1	2	0	0	0	1	1	0	0	0	4.1	105	26.3	74	0.7	100.8	56.8	0	0
499	4617	0	4617	0	4617	0	0	143	142.952	33	1	58	1	1	0	0	0	0	0	0	4	1	1	2	0	0	0	1	1	0	0	0	3.6	110	27.4	97			62.34	0	0
500	3486	1	3486	0	3486	0	0	141	140.952	36	1	65	1	0	0	0	0	0	0	0	4	0	1	0	0	0	0	2	1	0	0	0	3.5	105	27.4	97	1.1	80.6	69.23	0	0
501	4680	0	4680	0	4680	0	0	141	141.16	53	1	70	0	0	0	0	0	0	0	0	4	0	2	7	0	0	0	1	1	0	0	0	4.2	105	29	110	1.1	74.5		0
502	4707	0	4707	0	4707	0	0	141	141.352	61	1	61	0	1	1	1	0	0	0	0	4	0	2	5	0	0	0	2	1	0	0	0	3.7	107	28	122	1	80.9	68.75	1	0
503	4686	0	4686	0	4686	0	0	137	136.792	34	2	44	0	0	0	0	0	0	0	1	4	0	1	0	0	0	0	1	1	0	0	0	3.6	102	27	87	0.7	102	59.68	1	0
504	4581	0	4581	0	4581	0	0	139	139.064	47	1	87	0	1	0	0	0	0	0	0	4	0	2	2	0	0	0	2	1	0	0	0	4.1	104	29	104	1.2	69.1	63.56	0	0
505	4536	0	4536	0	4536	0	0	137	136.936	30	1	61	1	1	0	0	0	0	1	0	4	0	1	1	0	0	0	1	1	0	0	0	4.6	107	25.5	96	0.8	120.8	63.04	0	0
506	2397	1	2372	0	2372	0	0	144	143.616	55	1	57	0	1	1	0	0	0	0	0	1	0	1	1	0	0	0	2	1	0	0	0	4.2	109	28.2	76	1.1	74	64.86	1
507	4614	0	4614	0	4614	0	1	131	131.72	45	1		0	0	0	0	0	0	0	0	4	0	1	3	0	0	0	2	1	0	0	0	5.1	106	20	145	6.6	9.7	54.62	0	1
508	93	0	93	0	93	0	0	135	135.096	41	2	52	0	1	0	0	0	0	0	0	3	0	1	3	0	0	0	1	1	0	0	0	3.6	101	27.3	106	0.8	84.2	50	0
509	4593	0	4593	0	4593	0	0	138	138.336	37	1	62	0	1	0	0	0	0	0	0	3	0	3	5	0	0	1	2	1	0	0	0	3.4	102	25.4	121	1.2	72.5	64.47	0	0
510	852	1	420	1	433	0	0	141	140.76	25	2	50	0	1	0	0	0	0	0	0	3	0	1	7	0	0	0	1	1	0	0	0	3.2	107	28	85	1	71.9	58.18	0	0
511	3555	0	3555	0	3555	0	0	140	139.856	22	2	47	0	1	0	0	0	0	0	0	2	0	1	0	0	0	0	1	1	0	0	0	3.6	102	24	91	0.6	133.1	67.29	0	0
512	4629	0	4629	0	4629	0	0	138	138.496	47	1	67	0	0	0	0	0	0	0	0	4	0	1	0	0	0	0	1	1	0	0	0	4.3	108	25.9	131	1.1	76.4	62.7	0
513	4629	0	4440	1	4461	0	0	141	141.736	41	1	57	0	1	0	0	0	0	0	0	4	0	2	4	0	0	0	2	1	0	0	0	3.5	104	25	146	0.9	99	69.43	0	0
514	4509	0	4509	0	4509	0	0	144	143.952	24	1	64	1	1	0	0	0	0	0	0	2	0	1	3	0	0	0	1	1	0	0	0	3.7	106	26	97	1.3	72.2	64.67	0	0
515	4632	0	4632	0	4632	0	0	137	137.304	42	2	50	0	1	0	0	0	0	0	0	4	0	1	5	0	0	0	1	1	0	0	0	3.5	104	28.8	119	0.6	116.7	66.25	0
516	524	0	524	0	524	0	0	137	138.264	61	1	72	0	1	1	0	0	0	0	1	1	0	2	7	0	0	0	1	1	0	0	0	4	103	23	179	1.2	65.5	56.82	0	0
517	4539	0	4539	0	4539	0	0	141	141.144	26	2	57	0	1	0	0	0	0	0	0	3	0	3	5	0	0	0	2	1	0	0	0	3.7	109	26.8	109	0.7	107.7	60.53	0	0
518	3636	0	3360	1	1134	1	0	137	137.016	40	1	53	1	1	0	0	0	0	0	0	4	0	1	2	0	0	0	1	1	0	0	0	4.1	105	23	101	1	88.1	56.8	0	0
519	4611	0	4611	0	4611	0	0	139	138.92	33	2	47	0	1	0	0	0	0	0	0	4	0	2	5	0	0	1	2	1	0	0	0	3.6	109	26	95	0.8	87.9	57.84	1	0
520	4611	0	4611	0	4611	0	0	141	141.16	29	1	61	0	1	0	0	0	0	0	0	3	0	1	6	0	0	1	1	1	0	0	0	4	103	24	110	1.4	63.8	60.71	0	0
521	4536	0	4536	0	4536	0	0	131	138.168	33	1	72	0	1	0	0	0	0	0	0	4	0	1	3	0	0	0	1	1	0	0	0	4.2	91	26	548	1	91.6	53.38	0	0
522	4602	0	4602	0	4602	0	0	139	138.808	32	1	63	0	1	0	0	0	0	0	0	4	0	1	5	0	0	0	1	1	0	0	0	4.3	105	25.8	88	1.4	62.5	65.45	0	0
523	4602	0	4590	1	4590	0	1	132	134.464	47	1	63	0	1	1	0	0	0	0	0	4	0	3	3	0	0	1	2	1	0	0	0	5.5	103	20	254	1.5	53.4	58.51	0
524	4593	0	4593	0	4593	0	0	139	139.144	48	1	61	0	1	0	0	0	0	0	0	4	0	2	4	0	0	1	2	1	0	0	0	4	110	24.8	109	0.8	109.8	62.67	0
525	3873	0	3873	0	3873	0	0	135	135.8	50	1	78	0	1	0	1	0	0	0	0	4	0	1	1	0	0	0	2	1	0	0	0	3.7	102	24	150	1.2	68.2	64	0	0
526	3507	0	3507	0	3507	0	0	138	137.904	42	2	39	0	1	0	0	0	0	0	0	4	0	1	0	0	0	0	2	1	0	0	0	3.6	101	27	94	0.9	73.1		0
527	4539	0	4539	0	4959	1	0	137	137.144	55	1	66	0	1	0	0	0	0	0	0	2	0	1	2	0	0	0	1	1	0	0	0	4	103	26.9	109	1.2	66.9	53.78	1	0
528	4572	0	4572	0	4572	0	0	139	138.968	36	1	54	0	1	0	0	0	0	0	0	4	0	2	2	0	0	0	2	1	0	0	0	4.4	104	27	98	1.1	80.6	47.97	1	0
529	145	1	120	1	145	0	1	135	134.92	44	1	63	0	1	0	0	0	0	1	0	4	0	1	4	0	0	0	1	1	0	0	0	4.4	106	27.1	95	1.2	70	68.03	1
530	4563	0	4563	0	2967	1	0	137	136.984	53	1	83	0	1	0	0	0	0	0	0	2	0	3	5	0	0	0	2	1	0	0	0	3.7	102	27	99	1.1	74.5	71.28	0
531	4539	0	4539	0	4539	0	1	133	132.664	31	1	63	0	1	0	0	0	0	0	0	4	0	3	5	0	0	0	1	1	0	0	0	4.7	98	20.5	79	0.9	104.8	42.95	0
532	4512	0	4512	0	4512	0	0	135	136.856	28	1	53	1	0	0	0	0	0	0	0	2	0	1	2	0	0	1	2	1	0	0	0	3.3	96	29	216	1.2	76.7	63.93	0	0
533	3558	0	3558	0	489	1	0	140	141.488	59	1	58	0	1	1	0	0	0	0	0	2	0	1	5	0	0	0	1	1	0	0	0	4.4	104	30	193	1.1	72.9	61.04	0
534	4527	0	4527	0	4527	0	0	139	139.32	34	1	62	0	1	0	0	0	0	0	0	4	0	2	5	0	0	0	2	1	0	0	0	4.8	106	26	120	1	91.1	53.28	0	0
535	4512	0	4512	0	4512	0	0	140	140.096	22	2	66	0	1	0	0	0	0	0	0	4	0	1	2	0	0	0	1	1	0	0	0	3.5	108	20	106	1	73.8	63.96	1	0
536	4452	0	4452	0	12	1	0	141	140.808	39	2	51	0	1	0	0	0	0	0	0	2	0	1	5	0	0	0	1	1	0	0	0	4.1	105	26	88	0.9	74.2	62.67	1	0
537	4503	0	4503	0	4503	0	0	141	140.936	40	1	68	1	0	0	0	0	0	0	0	4	0	2	4	0	0	0	1	1	0	0	0	3.7	101	27	96	1.4	59.8	63.83	0	0
538	4491	0	4491	0	4491	0	0	139	139.592	37	2	48	0	1	0	0	0	0	0	0	2	0	1	4	0	0	0	1	1	0	0	0	4.2	100	26.8	137	0.7	100.2		0	0
539	4392	0	4392	0	4392	0	0	141	140.776	34	1	70	0	0	0	0	0	0	0	0	3	0	1	0	0	0	1	1	1	0	0	0	4.1	104	25	86	1.4	61.8	63.95	1	0
540	4482	0	4482	0	4482	0	0	137	137.272	43	1	72	0	1	0	1	0	0	0	0	4	0	2	5	0	0	0	2	1	0	0	0	3.9	103	23	117	1.1	77.8	53.38	0
541	4449	0	4449	0	4449	0	0	141	141.144	37	2	61	0	0	0	0	0	0	0	0	4	0	1	2	0	0	0	1	1	0	0	0	4.4	103	27.3	109	1.1	59.5	66.15	0	1
542	2733	0	2733	0	2733	0	0	139	138.936	50	2	57	0	1	0	0	0	0	0	0	4	0	1	1	0	0	0	2	1	0	0	0	5.2	102	24	96	0.7	94.3	40.27	1	0
543	4443	0	4443	0	4443	0	0	139	138.984	28	1	53	0	1	0	0	0	0	0	0	4	0	1	0	0	0	0	1	1	0	0	0	3.7	102	25	99	0.8	122.5	63.83	0	0
544	847	0	840	1	12	1	0	139	139.288	49	2	80	0	1	0	0	0	0	0	0	3	0	2	6	0	0	0	2	1	0	0	0	3.8	104	25	118	1.4	42.5	63.64	1	0
545	4413	0	4413	0	4413	0	0	137	136.92	34	2	57	0	0	0	0	0	0	0	0	4	0	1	0	0	0	0	1	1	0	0	0	3.8	105	23	95	0.6	121.8	65.22	0	0
546	1074	0	750	1	426	1	1	133	134.36	58	1	77	0	0	1	0	0	0	0	0	1	0	1	2	0	0	0	1	1	0	0	0	4.7	99	21	185	1	81.7	70	0	1
547	4473	0	4473	0	4473	0	0	136	136.256	34	1	54	1	1	0	0	0	0	0	0	2	1	2	2	0	0	1	2	1	0	0	0	3.6	101	22	116			66.92	1	0
548	4479	0	4479	0	4479	0	0	136	135.936	35	2	45	0	1	0	0	0	0	0	0	3	0	1	0	0	0	0	1	1	0	0	0	4	105	20	96	0.7	101.4	64.86	0	0
549	4485	0	4485	0	4485	0	0	140	140.24	55	1	88	1	1	0	0	0	0	0	0	4	0	2	3	0	0	0	2	1	0	0	0	3.9	106	23	115	1.4	56	68.91	0	0
550	4416	0	4416	0	9	1	0	142	142.336	51	2	79	0	1	0	0	0	0	0	0	3	1	1	2	0	0	1	2	1	0	0	0	4.6	116	17	121			67.86	0
551	3747	0	3747	0	3747	0	0	139	138.856	58	1	72	0	1	0	0	0	0	0	0	3	0	1	3	0	0	0	1	1	0	0	0	3.4	105	20	91	0.8	105.7	62.59	1	0
552	165	0	150	1	165	0	0	139	138.872	32	1	73	0	0	0	0	0	0	0	0	3	0	2	2	0	0	0	1	1	0	0	0	4.4	107	23.8	92	2.2	37.1	70.37	0
553	4473	0	4473	0	4473	0	0	140	139.872	36	1	58	0	1	0	0	0	0	1	0	4	0	2	4	0	0	0	1	1	0	0	0	4.3	106	25	92	1	90	45.98	1	0
554	126	1	126	0	126	0	1	131	131.144	51	2	51	0	1	0	0	0	0	0	0	4	0	1	3	0	0	0	1	1	0	0	0	4.2	91	24	109	0.8	80.5	65.74	0
555	4377	0	4377	0	4377	0	0	137	136.792	40	2	51	0	1	0	0	0	0	0	0	4	0	1	3	0	0	0	1	1	0	0	0	3.3	103	23	87	0.9	73.8	62.11	0	0
556	4413	0	4413	0	4413	0	0	140	139.728	47	2	56	0	1	0	0	0	0	0	0	3	0	2	3	0	0	0	1	1	0	0	0	3.9	107	22	83	0.7	95.5	77.78	0	0
557	3705	0	3705	0	3705	0	0	135	135.88	30	2	49	0	1	0	0	0	0	0	0	4	0	2	0	0	0	0	1	1	0	0	0	4.1	102	22.8	155	0.9	78.3	50.39	0
558	4368	0	4368	0	4368	0	0	140	139.776	23	1	61	0	0	0	0	0	0	0	0	4	0	1	3	0	0	0	1	1	0	0	0	3.8	103	25	86	0.8	127.5	47.01	0	0
559	4416	0	4416	0	4416	0	0	142	141.808	42	1	66	0	1	0	0	0	0	0	0	4	0	2	5	0	0	0	1	1	0	0	0	3.6	102	25	88	0.9	98.5	67.11	0	0
560	4434	0	4434	0	4434	0	0	136	135.76	39	2	48	0	1	0	0	0	0	0	0	4	0	1	5	0	0	0	1	1	0	0	0	4.6	103	24	85	1	65.7	56.06	0	0
561	99	0	90	1	318	1	1	132	134.16	31	1	72	0	1	0	0	0	0	0	0	4	0	2	3	0	0	0	2	1	0	0	0	5.4	104	17.9	235	1.9	44.2	56.33	1
562	3447	0	3447	0	3411	1	0	138	138.528	58	2	49	0	1	0	0	0	0	0	0	4	0	1	2	0	0	0	2	1	0	0	0	4.8	112	25.1	133	1.7	32.9	66	0
563	4383	0	4383	0	4383	0	0	139	138.936	32	1	69	0	1	0	0	0	0	0	0	3	0	1	3	0	0	0	1	1	0	0	0	4.8	108	22	96	1.2	74.7	58.12	0	0
564	4422	0	4422	0	4422	0	0	138	137.904	30	1	60	0	1	0	0	0	0	0	0	4	0	1	2	0	0	0	1	1	0	0	0	4.7	105	23	94	1.3	69	60.36	0	0
565	4350	0	4350	0	4350	0	0	139	139.016	34	1	71	1	1	0	0	0	0	0	0	4	0	2	5	0	0	0	2	1	0	0	0	3.7	106	23	101	1.3	67.3	66.67	0	0
566	1804	1	1770	1	1804	0	0	136	136.928	60	1	69	0	1	1	1	0	0	0	0	1	0	2	6	0	0	0	1	1	0	0	0	4.8	103	22	158	1.3	59.9	60.71	0	0
567	4392	0	4392	0	4392	0	0	135	135.064	43	1	67	1	1	0	0	0	0	0	0	4	0	2	2	0	0	0	1	1	0	0	0	3.5	103	23	104	1	86.8	46.26	0
568	4356	0	4356	0	4356	0	1	135	134.808	35	2	46	0	1	0	0	0	0	0	0	4	0	2	3	0	0	0	1	1	0	0	0	3.7	97	27.3	88	0.7	101.4	71.54	0
569	4419	0	4419	0	4419	0	0	138	138.032	54	2	44	0	1	0	0	0	0	0	0	2	0	1	6	0	0	0	2	1	0	0	0	4	105	23	102	0.7	92.8	54.67	0	0
570	3693	0	3693	0	3693	0	0	136	136.16	47	1	52	0	1	0	0	0	0	0	0	4	0	3	5	0	0	0	2	1	0	0	0	4.1	101	24	110			51.79	0
571	4392	0	4392	0	1311	1	0	139	138.792	29	2	48	1	0	0	0	0	0	0	0	4	0	1	0	0	0	0	1	1	0	0	0	4.2	103	27.6	87	0.7	105.3	63.38	1	0
572	4359	0	4359	0	4359	0	0	143	142.536	54	1	60	0	1	0	0	0	0	0	0	2	0	1	3	0	0	0	1	1	0	0	0	3.7	107	24	71	1	82.9	60.66	1	0
573	4311	0	4311	0	4311	0	0	141	141	25	1	63	1	1	0	0	0	0	0	0	4	0	1	3	0	0	0	2	1	0	0	0	4.5	107	29	100	1.5	60.7	62.2	0	0
574	2808	0	2280	1	51	1	0	137	136.968	41	1	72	1	1	0	1	0	0	0	0	4	0	1	5	0	0	0	1	1	0	0	0	3.6	103	20	98	1.9	41.8	57.89	0	0
575	4320	0	4320	0	143	1	0	141	140.776	30	1	66	1	1	0	0	0	0	0	0	4	0	2	5	0	0	0	2	1	0	0	0	3.9	103	26	86	0.9	105.5	58.43	0	0
576	4344	0	2220	1	1698	1	1	135	134.936	56	1	64	0	1	0	0	0	0	0	0	3	0	2	4	0	0	0	2	1	0	0	0	5	106	18	96	1.4	55.8	27.78	0
577	2249	0	2220	1	2061	1	0	137	137.736	33	1	59	0	1	0	0	0	0	0	0	4	0	2	3	0	0	0	2	1	0	0	0	4.1	101	31.4	146	1	91.6	64.67	1
578	4326	0	4326	0	4326	0	0	138	137.92	44	1	54	1	1	0	0	0	0	0	0	4	0	2	4	0	0	0	1	1	0	0	0	4	104	24.1	95	1.6	50.2	60	0
579	4356	0	4356	0	4356	0	1	135	134.776	27	2	50	0	1	0	0	0	0	0	0	2	1	1	0	0	0	1	2	1	0	0	0	3.7	103	22.8	86			62.59	0	0
580	2223	0	2223	0	2223	0	1	135	134.728	56	1	60	1	1	1	0	0	0	0	0	4	0	2	4	0	0	0	2	1	0	0	0	3.6	97	28	83	0.9	92.9	56.1	1	0
581	4242	0	4242	0	4242	0	0	139	138.856	41	1	67	0	1	0	0	0	0	0	0	4	0	2	4	0	0	0	1	1	0	0	0	3.7	104	26.3	91	1	87.7	59.52	0	0
582	4326	0	4326	0	4326	0	1	134	134.016	39	1	57	1	0	0	0	0	0	0	0	4	0	1	4	0	0	0	1	1	0	0	0	3.7	101	22	101	1.1	79.3	57.28	0	0
583	4305	0	4305	0	4305	0	0	137	136.888	25	1	75	1	1	0	0	0	0	0	0	2	0	1	5	0	0	0	1	1	0	0	0	3.9	104	23	93	1.5	60.7	64.75	0	0
584	4347	0	4347	0	4347	0	0	137	141.864	47	1	77	0	1	0	0	0	0	0	0	4	0	1	3	0	0	0	1	1	0	0	0	4	106	23.2	404	1.1	76.4	56.52	0	0
585	4302	0	4302	0	78	1	1	134	134.368	31	1	58	0	1	0	0	0	0	0	0	4	0	1	6	0	0	0	1	1	0	0	0	5	100	27.5	123	0.9	104.8	60.67	1
586	4320	0	4320	0	4320	0	0	140	139.792	28	2	45	0	1	0	0	0	0	0	0	4	0	1	0	0	0	0	1	1	0	0	0	4.3	108	22.4	87	0.6	126.7	72.37	1	0
587	4344	0	4344	0	4344	0	0	143	142.712	51	2	52	0	1	0	0	0	0	0	0	4	0	1	0	0	0	0	1	1	0	0	0	3.7	106	26.3	82	0.9	70.3	60.31	0	0
588	2821	1	2790	1	2806	0	0	139	139.176	64	1	64	0	1	1	0	0	0	0	0	1	0	2	4	0	0	0	2	1	0	0	0	3.6	106	21.6	111	1.1	71.7		1	0
589	4287	0	4287	0	549	1	0	136	136.256	30	1	64	0	1	0	0	0	0	0	0	2	0	3	4	0	0	1	2	1	0	0	0	4.8	103	21	116	1.5	58.5	71.43	0
590	939	0	939	0	939	0	0	140	140.176	20	1	48	0	1	0	0	0	0	0	0	2	0	1	2	0	0	0	1	1	0	0	0	3.5	104	24	111	1.1	90.9	52.13	1	0
591	4308	0	4308	0	90	1	1	127	126.632	48	1	75	1	1	0	0	0	0	0	0	4	0	1	1	0	0	0	1	1	0	0	0	4.2	100	21.3	77	1.3	62.7	60.66	1
592	4057	0	4057	0	4057	0	0	137	142.568	57	2	72	0	1	1	0	0	0	0	0	1	0	2	4	0	0	0	2	1	0	0	0	4.4	101	21.5	448	0.9	68.7	64.58	0	0
593	4287	0	4287	0	4287	0	0	139	139.208	47	2	51	0	1	0	0	0	0	0	0	4	0	1	3	0	0	0	1	1	0	0	0	3.8	104	26.8	113	0.8	81.8	59	0
594	4185	0	4185	0	1254	1	0	136	136.128	49	2	53	0	1	0	0	0	0	0	0	4	0	1	3	0	0	0	2	1	0	0	0	4.2	107	20	108	1.1	56.2	67.69	0
595	4221	0	4221	0	4221	0	0	139	138.856	20	1	53	0	0	0	0	0	0	0	0	2	0	1	2	0	0	0	1	1	0	0	0	4.9	103	23	91	0.9	114.5	66.27	1	0
596	4266	0	4266	0	240	1	0	137	136.84	25	2	52	0	1	0	0	0	0	0	0	4	0	1	3	0	0	0	2	1	0	0	0	3.6	105	25.8	90	0.8	93		1	1
597	288	0	288	0	288	0	0	139	138.888	45	2	62	0	0	0	0	0	0	0	0	3	0	1	5	0	0	0	1	1	0	0	0	4.3	104	22	93	1.1	57.2	60.28	0	0
598	3348	0	3210	1	3216	0	0	142	141.872	47	2	46	0	1	0	0	0	0	0	0	4	0	1	3	0	0	0	2	1	0	0	0	3.9	106	28	92	1.3	46.7	50.68	0	0
599	3300	0	3300	1	3249	1	0	140	140.416	35	1	76	0	1	0	0	0	0	0	0	4	0	2	3	0	0	0	1	1	0	0	0	3.5	106	22	126	1.5	56.7	59.54	0
600	4293	0	4293	0	4293	0	0	137	137.832	35	1	71	1	1	0	0	0	0	0	0	4	0	2	3	0	0	0	1	1	0	0	0	3.8	101	24.2	152	1	90.5	60.92	0	0
601	2646	0	2646	0	2646	0	0	139	139.144	39	1	63	0	1	0	0	0	0	0	0	4	0	1	0	0	0	0	1	1	0	0	0	4	101	28	109	0.9	100	62.26	0
602	4260	0	4260	0	4260	0	0	138	138.304	47	2	57	0	1	0	0	0	0	0	0	4	0	1	3	0	0	0	2	1	0	0	0	4.2	108	23.8	119	0.8	81.8	58.33	0
603	375	0	360	1	27	1	0	137	139.064	40	1	64	1	1	0	0	0	0	0	0	4	0	2	4	0	0	0	2	1	0	0	0	3.9	105	20	229	2.3	33.7	75	1	0
604	4281	0	4281	0	4281	0	0	142	141.936	39	1	64	1	1	0	0	0	0	0	0	4	0	1	0	0	0	0	2	1	0	0	0	3.5	103	25	96	1.8	44.9	62.05	1	0
605	3390	0	3390	0	3390	0	0	136	136.096	58	1	67	1	1	0	0	0	0	1	0	2	0	2	6	0	0	1	1	1	0	0	0	3.9	101	25	106	1	81.7	69.52	0	0
606	4275	0	4275	0	4275	0	0	136	135.744	39	2	60	0	0	0	0	0	0	0	0	4	0	1	4	0	0	0	2	1	0	0	0	3.4	103	21	84	0.9	74.2	65.62	0	0
607	3975	0	3975	0	3975	0	0	139	140.216	40	1	67	0	0	1	0	0	0	0	0	1	0	1	0	0	0	0	1	1	0	0	0	3.7	102	28	176	1.4	59.8	68.25	1	0
608	4215	0	4215	0	4215	0	0	140	141.376	43	1	69	0	1	0	0	0	0	1	0	4	0	3	6	0	0	1	2	1	0	0	0	4.2	110	22.9	186	0.8	112.3	64.2	0	0
609	4224	0	4140	1	4143	0	0	140	139.808	30	1	69	0	1	0	0	0	0	0	0	4	0	1	6	0	0	1	1	1	0	0	0	3.6	107	21	88	1.2	75.7	63.87	1	0
610	4212	0	4212	0	4212	0	0	138	137.792	42	2	51	0	1	0	0	0	0	0	0	4	0	2	2	0	0	0	2	1	0	0	0	4.3	107	23	87	0.7	97.7	65.89	0	0
611	4176	0	4176	0	4176	0	0	141	140.952	37	1	65	0	1	0	0	0	0	0	0	4	0	1	2	0	0	0	1	1	0	0	0	3.9	103	22.5	97	1	89.5	67.92	0	0
612	4224	0	4224	0	4224	0	0	136	135.952	37	2	45	0	1	0	0	0	0	0	0	2	0	1	5	0	0	1	1	1	0	0	0	3.6	101	35	97	0.8	85.9	65.45	1	0
613	4173	0	4173	0	4173	0	0	139	138.744	43	1	58	1	1	0	0	0	0	0	0	4	0	1	2	0	0	0	1	1	0	0	0	3.9	102	27	84	1.1	77.8	60.82	0	0
614	4230	0	4230	0	4230	0	0	140	142.336	26	1	61	0	1	0	0	0	0	0	0	4	0	1	2	0	0	0	1	1	0	0	0	5	108	26	246	1	96.2	63.87	1	0
615	2268	0	2268	0	2268	0	0	140	139.776	25	1	66	0	1	0	0	0	0	0	0	4	0	1	3	0	0	0	1	1	0	0	0	4.6	112	23.2	86	1.1	86.8	53.68	0
616	1954	0	1950	1	84	1	0	137	136.904	42	1	63	0	1	0	1	0	0	1	0	4	0	2	4	0	0	0	1	1	0	0	0	4.2	107	21.2	94	0.9	98.5	35.16	0	0
617	1350	0	1350	0	96	1	0	136	136.176	42	1	64	1	1	0	0	0	0	1	0	4	0	1	4	0	0	0	1	1	0	0	0	3.8	107	22.9	111	1.2	70.7	50	0	0
618	690	1	690	0	468	1	0	139	138.648	45	1	65	1	1	0	0	0	0	0	0	4	0	2	3	0	0	0	1	1	0	0	0	4.8	105	21	78	0.9	97.1	53.95	0
619	4191	0	4191	0	1287	1	0	138	137.712	39	2	43	0	1	1	0	0	0	0	0	4	0	1	3	0	0	0	1	1	0	0	0	3.9	104	24	82	0.7	99.2	58.42	0	0
620	4146	0	4146	0	4146	0	0	140	139.76	45	1	71	0	1	0	0	0	0	0	0	4	0	1	1	0	0	0	1	1	0	0	0	3.4	107	21	85	1.4	58.3	66.67	0	0
621	4119	0	4119	0	4119	0	0	144	143.84	37	1	66	0	0	0	0	0	0	0	0	2	0	2	5	0	0	0	1	1	0	0	0	4.3	106	24.6	90	1.2	72.5	62.07	0	0
622	4113	0	4113	0	4113	0	0	143	142.264	53	2	60	0	0	1	0	0	0	0	0	4	0	1	7	0	0	0	2	1	0	0	0	3.9	107	25.3	54	0.7	93.2	69.23	0	0
623	4089	0	4089	0	4089	0	0	136	136.688	46	1	62	0	1	0	0	0	0	0	0	2	0	2	4	0	0	0	2	1	0	0	0	4.4	104	23.5	143	0.9	96.7		0
624	4122	0	4122	0	4122	0	0	139	143.832	47	1	73	0	1	0	0	0	0	0	0	4	0	1	2	0	0	0	2	1	0	0	0	4.3	104	23.8	402	1.4	57.8	56.76	0	0
625	4149	0	4149	0	4149	0	0	141	140.952	37	2	51	0	1	0	0	0	0	0	0	4	0	1	7	0	0	0	1	0	0	0	0	4.3	106	26	97	0.8	85.9	47.76	0	0
626	4089	0	4089	0	27	1	0	139	139.032	48	1	52	0	1	0	0	0	0	0	0	2	0	2	2	0	0	0	2	1	0	0	0	4	103	24	102	6	10.7	62.37	1
627	4101	0	4101	0	4101	0	0	137	137.128	26	1	83	0	1	0	0	0	0	0	0	4	0	1	2	0	0	0	1	1	0	0	0	4	103	26	108	1.3	71	67.57	0	0
628	4152	0	4152	0	4152	0	0	138	137.808	28	2	64	0	1	0	0	0	0	0	0	4	0	1	3	0	0	0	1	1	0	0	0	3.9	103	20.3	88	0.9	79.4	64.65	0	0
629	3852	0	3852	0	3852	0	0	138	139.12	54	2	49.1	0	1	1	0	0	1	0	0	1	0	1	3	0	0	1	1	1	0	0	0	4.7	105	17.3	170	0.8	79.6	67.89	0
630	4104	0	4104	0	4104	0	0	140	140.16	28	1	61	0	1	0	0	0	0	0	0	4	0	1	3	0	0	0	1	1	0	0	0	3.5	105	21.6	110	0.9	107	63.74	0	0
631	4149	0	4149	0	4149	0	0	145	145	21	1	57	0	1	0	0	0	0	0	0	4	0	1	3	0	0	0	1	1	0	0	0	4.1	107	21.4	100	1.1	90	67.23	0	0
632	4086	0	4086	0	4086	0	0	137	136.696	25	1	48	1	1	0	0	0	0	0	0	4	0	1	0	0	0	1	1	1	0	0	0	3.5	102	24.2	81	1.1	86.8	59.09	0
633	4059	0	4059	0	4059	0	0	138	138.336	44	1	57	0	1	0	0	0	0	0	0	4	0	2	4	0	0	0	1	1	0	0	0	5	109	23.3	121	1.2	70	66.94	0	0
634	3872	0	3872	0	274	1	0	138	138.032	41	1	52.6	0	1	1	0	0	0	0	0	1	0	2	2	0	0	0	2	1	0	0	0	4.3	106	17.9	102			46.81	0
635	4140	0	4140	0	4140	0	0	143	142.744	46	1	69	1	1	0	1	0	0	0	0	4	0	1	3	0	0	0	1	1	0	0	0	4.5	108	26.3	84	1.1	76.7	54.64	0	0
636	123	1	123	0	123	0	1	131	131.112	62	1	65	0	1	0	0	0	0	0	0	4	0	2	5	0	0	1	1	1	0	0	0	3.2	103	13.8	107	1.3	59.5	67.33	0
637	3850	0	3850	0	3850	0	0	138	139.056	30	2	48.3	0	1	1	0	0	0	0	0	1	0	1	0	0	0	0	1	1	0	0	0	4.2	97	29.7	166	0.8	89.7	40	0	0
638	4107	0	4107	0	4107	0	0	140	141.056	38	1	65	0	1	0	0	0	0	0	0	4	0	1	3	0	0	0	1	1	0	0	0	3.9	116	20.4	166	1.2	72.1	59.74	1	0
639	4104	0	4104	0	4104	0	0	142	141.792	36	2	52	0	1	0	0	0	0	0	0	2	0	1	2	0	0	0	1	1	0	0	0	3.8	105	28	87	0.9	75.4	57.84	0	0
640	4110	0	4110	0	4110	0	0	143	142.888	30	2	44	0	0	0	0	0	0	0	0	4	0	1	2	0	0	1	1	1	0	0	0	4.2	108	24.9	93	0.7	104.6	62.79	0	0
641	4113	0	4113	0	4113	0	0	141	141.016	33	1	74	1	1	0	0	0	0	0	0	4	0	1	5	0	0	1	1	1	0	0	0	3.7	105	25.9	101	1.2	74.2	61.11	0	0
642	4080	0	4080	0	195	1	0	142	141.856	35	1	58	0	0	0	0	0	0	0	0	3	0	1	2	0	0	0	1	1	0	0	0	3.7	105	24.8	91	1.2	73.3	60.68	0	0
643	4101	0	4101	0	4101	0	0	143	142.616	50	2	57	0	1	0	0	0	0	0	0	4	0	2	6	0	0	0	2	1	0	0	0	4.2	104	29.8	76	1.1	56	68.63	0
644	4107	0	4107	0	4107	0	0	141	140.92	41	2	55	0	1	0	0	0	0	0	0	4	0	1	3	0	0	0	1	1	0	0	0	3.7	105	26.1	95	1.1	58.3	57.83	0	0
645	4053	0	4053	0	4053	0	0	142	142.64	31	2	48	0	0	0	0	0	0	0	0	2	0	1	4	0	0	1	2	1	0	0	0	3.7	108	22.4	140	1.2	55.8	59.7	0	0
646	4020	0	4020	0	4020	0	0	142	142.112	28	1	62	0	1	0	0	0	0	0	0	4	0	2	5	0	0	1	1	1	0	0	0	4.6	109	23.5	107	1.2	76.7	61.88	0
647	4035	0	4035	0	9	1	0	142	142.064	43	2	56	0	0	0	0	0	0	0	0	4	0	1	2	0	0	0	2	1	0	0	0	3.8	108	23.2	104	1.4	43.7	57.58	1	0
648	1029	0	1029	0	1029	0	0	143	144.312	49	1	90	1	1	0	0	0	0	0	0	4	0	2	5	0	0	0	2	1	0	0	0	4.3	113	21.8	182	1	84.5	63.44	0
649	4044	0	4044	0	4044	0	0	139	139.32	42	2	61	0	1	0	0	0	0	0	0	4	0	1	3	0	0	0	1	1	0	0	0	4.3	102	30.3	120	0.9	73.1	37.06	0
650	4059	0	4059	0	4059	0	0	141	141.032	37	2	65	0	1	0	0	0	0	0	0	4	0	1	3	0	0	0	1	1	0	0	0	4	111	19.7	102	0.9	75	52.3	0	0
651	3999	0	3999	0	3999	0	0	136	136.88	28	1	72	0	1	1	0	0	0	0	0	4	0	2	7	0	0	0	2	1	0	0	0	4.8	101	25.6	155	1.7	51.3	67.14	0
652	4038	0	4038	0	4038	0	0	136	139.824	42	1	50	0	1	1	0	0	0	0	0	4	0	1	3	0	0	0	1	1	0	0	0	4.2	99	25.5	339	1	87.2	56	0	0
653	3939	0	3939	0	3939	0	0	142	142.032	37	1	51	0	1	0	0	0	0	0	0	2	0	1	1	0	0	0	2	1	0	0	0	3.8	104	29.6	102	1.1	80.2	58.23	0	0
654	345	0	360	1	306	1	0	141	140.888	36	1	54	0	1	0	0	0	0	0	0	4	0	3	1	0	0	1	2	1	0	0	0	4	120	10	93			46.06	0	0
655	3948	0	3948	0	3948	0	0	143	142.968	52	1	72	0	0	0	0	0	0	0	0	4	0	2	4	0	0	1	1	1	0	0	0	4	111	21.6	98	0.9	94.3	70.75	1	0
656	3201	1	3201	0	3201	0	0	140	142.096	43	1	72	1	1	1	0	0	0	0	0	4	0	2	5	0	0	0	1	1	0	0	0	4.6	106	23.9	231	1.3	64.1	54.95	0
657	3924	0	3924	0	81	1	0	143	143.32	39	1	65	0	1	0	0	0	0	0	0	4	0	1	4	0	0	0	1	1	0	0	0	5.1	114	24.8	120	1.6	51.5	46.67	0	0
658	4011	0	4011	0	4011	0	0	143	142.984	37	1	66	1	1	0	0	0	0	0	0	4	0	2	5	0	0	0	1	1	0	0	0	3.4	105	25.1	99	0.9	101.1	62.5	0	0
659	1077	0	1077	0	1077	0	0	139	138.936	24	2	61	0	1	0	0	0	0	0	0	3	0	1	4	0	0	1	2	1	0	0	0	4.5	101	29.3	96	0.9	81.9	56.03	0
660	3960	0	3960	0	3960	0	0	144	143.856	48	1	61	0	0	0	0	0	0	0	0	4	0	2	3	0	0	0	1	1	0	0	0	3.8	110	20.7	91	1.2	68.8	57.63	0	0
661	3933	0	3933	0	3933	0	0	141	140.856	44	2	67	0	0	0	0	0	0	0	0	4	0	1	0	0	0	0	1	1	0	0	0	3.8	104	24.7	91	0.9	72.4	67.92	0	0
662	3915	0	3915	0	3915	0	0	136	135.744	21	2	45	0	0	0	0	0	0	0	0	4	0	3	0	0	0	1	2	1	0	0	0	3.6	102	27.1	84	1.1	66.7	64.29	0
663	3960	0	3960	0	9	1	0	142	141.792	45	2	59	0	0	1	1	0	0	0	0	4	0	1	4	0	0	1	2	1	0	0	0	4.6	116	17	87	1.4	43.3	70.18	0	0
664	3690	0	3690	0	3690	0	0	143	143.944	59	1	67.3	0	0	1	0	0	0	0	0	1	0	1	3	0	0	0	2	1	0	0	0	4.8	107	29.7	159	1.2	66	57.27	1	0
665	3912	0	3912	0	3912	0	0	141	140.936	28	1	62	0	1	0	0	0	0	0	0	2	0	1	3	0	0	0	1	1	0	0	0	3.8	106	25.7	96	1.1	84.9	61.07	0	0
666	3903	0	3903	0	3903	0	0	140	139.824	39	1	55	0	1	0	0	0	0	0	0	2	0	2	2	0	0	0	1	1	0	0	0	3.9	106	23.7	89	0.9	100	47.67	0	0
667	3291	0	3060	1	18	1	1	133	133.976	62	1	56	1	0	0	0	0	0	0	0	3	0	2	4	0	0	1	2	1	0	0	0	4.4	104	19	161	0.8	104.3	62.34	0	0
668	3927	0	3927	0	3927	0	0	143	143.096	21	1	70	1	1	0	0	0	0	0	0	4	0	1	0	0	0	0	1	1	0	0	0	4.4	105	27.6	106	0.9	113.4		0	0
669	198	0	198	0	198	0	0	142	141.872	29	1	79	0	1	0	0	0	0	0	0	4	0	1	2	0	0	0	1	1	0	0	0	4.6	104	26.6	92	1.2	76.2	53.64	0	0
670	3852	0	3852	0	3852	0	0	143	142.904	26	1	60	0	1	0	0	0	0	0	0	4	0	1	0	0	0	0	1	1	0	0	0	4	104	28.3	94	1.1	86.1		0	0
671	1260	0	1260	1	69	1	0	143	143.032	35	1	55.8	0	1	0	0	0	0	0	0	2	0	2	3	0	0	0	1	1	0	0	0	3.7	105	24.6	102	1.3	66.9	67.67	0	0
672	2581	0	2580	1	2581	0	0	144	143.84	60	2	59	0	1	1	0	0	0	0	0	4	0	1	1	0	0	0	2	1	0	0	0	4.5	107	27.1	90	1.2	48.8	64.66	0
673	3858	0	3858	0	3858	0	0	143	143.064	33	1	72	1	1	1	0	0	0	0	0	4	0	1	0	0	0	0	1	1	0	0	0	4.3	107	22.8	104	1.2	74.2	31.97	0
674	3882	0	3882	0	3882	0	0	143	143.432	29	1	50	0	0	0	0	0	0	0	0	2	0	3	7	0	0	1	2	1	0	0	0	3.8	107	21.8	127	1	94	43.75	0	0
675	3894	0	3894	0	3894	0	0	141	141.624	37	1	57	0	0	0	0	0	0	0	0	4	0	3	7	0	0	1	2	1	0	0	0	4.5	105	29.3	139	1.3	66.1	68.28	0
676	3849	0	3849	0	3003	1	0	141	141.192	33	1	62	0	1	0	0	0	0	0	0	4	0	1	4	0	0	0	1	1	0	0	0	4.4	104	25.2	112	1.1	82.1	58.82	0
677	3693	0	3693	0	3693	0	0	142	142	55	2	43	0	0	0	0	0	0	0	0	4	0	2	6	0	0	1	1	1	0	0	0	5.9	106	21	100	1.1	54.9	67.35	0	0
678	3795	0	3795	0	3795	0	0	142	141.872	53	1	68	0	0	0	0	0	0	0	0	4	0	1	3	0	0	0	1	1	0	0	0	4.5	110	20.6	92	1.6	48.4	60.32
679	3729	0	3729	0	3729	0	0	145	144.712	51	2	72	0	0	0	0	0	0	0	0	4	0	2	5	0	0	1	2	1	0	0	0	4.5	110	29.2	82	1	62.2	60.27	1
680	3602	0	3602	0	3602	0	0	138	139.392	56	1	56.4	0	1	1	0	0	0	0	0	1	0	1	3	0	0	0	1	1	0	0	0	5.4	104	28	187	1.4	55.8	52.82	0	0
681	3762	0	3762	0	3762	0	0	144	143.952	31	1	66	0	1	0	0	0	0	0	0	4	0	1	2	0	0	0	1	1	0	0	0	3.9	107	27.2	97	1	92.8	57.23	0	0
682	3837	0	3837	0	108	1	0	143	142.936	28	1	59	0	0	0	0	0	0	0	0	2	0	1	2	0	0	0	2	1	0	0	0	3.9	106	25.4	96	0.9	107	62.73	0	0
683	3795	0	3795	0	3795	0	0	141	141.144	44	1	75	0	0	0	0	0	0	1	0	4	0	1	3	0	0	0	1	1	0	0	0	4	102	29.3	109	1.2	70	68.29	0	0
684	3750	0	3750	0	3750	0	0	140	140.24	43	2	58	0	1	0	0	0	0	0	0	4	0	1	3	0	0	0	2	1	0	0	0	4.5	106	24.2	115	0.7	97.2	55.77	0
685	3780	0	3780	0	3780	0	0	143	142.664	48	1	69	0	0	0	0	0	0	0	0	2	0	1	2	0	0	1	1	1	0	0	0	4.2	107	27.4	79	1.1	76.1	57.63	0	0
686	3813	0	3813	0	3813	0	0	140	139.744	43	1	69	1	0	0	0	0	0	0	0	4	0	2	4	0	0	1	1	1	0	0	0	4.5	107	23.9	84	1	86.8	58.77	0	0
687	3483	0	3483	0	3483	0	0	136	138.656	55	1	66.5	0	0	1	0	0	0	0	0	1	0	1	2	0	0	0	1	1	0	0	0	5.1	103	21.7	266	0.9	93.3	34.78	0	0
688	3768	0	3768	0	618	1	0	141	141	38	1	58	0	0	0	0	0	0	0	0	4	0	2	5	0	0	1	1	1	0	0	0	3.5	105	25.1	100	0.9	100.5	50	0	0
689	3774	0	3774	0	3774	0	0	141	141.336	23	2	46	0	0	0	0	0	0	0	0	2	0	1	2	0	0	0	2	1	0	0	0	4.2	103	28.5	121	0.8	94.6	59.18	0	0
690	3759	0	3759	0	3759	0	0	142	141.872	44	2	45	0	0	0	0	0	0	1	0	4	0	3	3	0	0	1	2	1	0	0	0	4.1	114	20.5	92	0.5	142.7	67.24	1	0
691	3774	0	3774	0	12	1	0	140	141.088	43	1	70	1	1	0	0	0	0	0	0	2	0	1	6	0	0	1	2	1	0	0	0	4.7	110	20.4	168	2.3	33.2	61.54		0
692	3771	0	3771	0	2454	1	0	140	139.936	32	2	49	0	0	0	0	0	0	0	0	4	0	1	2	0	0	0	2	1	0	0	0	3.6	109	23.1	96	0.7	103.2	57.89	1
693	3699	0	3699	0	3699	0	0	137	136.952	42	2	59	0	0	0	0	0	0	0	0	4	0	1	3	0	0	0	1	1	0	0	0	4	106	20.1	97	0.7	97.7	61.22	0	0
694	3681	0	3681	0	3681	0	0	143	143.128	20	1	64	0	0	0	0	0	0	0	0	4	0	1	3	0	0	0	2	1	0	0	0	4.6	106	30.5	108	1.2	82.2	57.25	0	0
695	3732	0	3732	0	3732	0	0	143	142.664	38	2	68	0	1	0	0	0	0	0	0	4	0	2	3	0	0	0	1	1	0	0	0	3.8	108	27.8	79	1.1	59.2	64.71	0	0
696	3462	0	3462	0	3462	0	0	141	141.048	45	1	75	0	0	0	0	0	0	0	0	3	0	1	4	0	0	0	1	1	0	0	0	4	110	18.2	103	1.2	69.7	55.03	0	0
697	3741	0	3741	0	3741	0	0	143	142.696	52	2	42	0	1	0	0	0	0	0	0	4	0	1	3	0	0	0	1	1	0	0	0	4.4	105	23.5	81	0.8	80.2	64.94	0	0
698	3747	0	3747	0	3747	0	0	139	141.048	43	2	43	0	1	1	0	0	0	0	0	4	0	3	2	0	0	1	2	1	0	0	0	4.1	113	23.3	228	0.6	116.2	63.95	0
699	3711	0	3711	0	3711	0	0	142	141.76	45	1	64	0	1	0	0	0	0	1	0	3	0	2	4	0	0	0	1	1	0	0	0	3.8	110	21.8	85	1.2	69.7	71.17	0	0
700	3624	0	3624	0	3624	0	0	141	140.76	48	2	72	0	0	0	0	0	0	0	0	4	0	1	2	0	0	0	1	1	0	0	0	4.3	108	21.9	85	0.7	95.1	66.67	0	0
701	3476	0	3476	0	216	1	0	141	140.808	44	1	78.4	0	1	1	0	0	0	0	0	1	0	2	5	0	0	1	1	1	0	0	0	3.4	101	27.9	88	1.3	63.8	62.9	0	0
702	3714	0	3714	0	3714	0	0	141	140.696	26	1	61	0	0	0	0	0	0	0	0	3	0	1	3	0	0	0	1	1	0	0	0	4.2	107	24.1	81	1.3	71	68.04	0	0
703	1272	0	1260	1	372	1	0	142	142.048	46	1	61	0	1	0	0	0	0	0	0	4	0	2	5	0	0	1	1	1	0	0	0	5.9	107	25.8	103	1.2	69.4	61.11	0
704	3729	0	3729	0	717	1	0	144	143.904	32	2	61	0	0	0	0	0	0	0	0	3	0	1	2	0	0	0	1	1	0	0	0	4	109	26.3	94	1.3	50.5	58.57	1	0
705	3714	0	3714	0	3714	0	0	144	143.648	26	1	62	1	1	0	0	0	0	0	0	2	0	1	0	0	0	0	1	1	0	0	0	5.1	108	24.4	78	1.4	65.2	55.12	0	0
706	3669	0	3669	0	3669	0	0	141	141.08	38	2	51	0	0	0	0	0	0	0	0	4	0	1	2	0	0	0	2	1	0	0	0	3.9	106	25	105	0.8	85.5	66.39	0	0
707	3386	0	3386	0	3386	0	0	143	142.088	64	1	60.7	0	1	1	0	0	0	0	0	1	0	1	1	0	0	0	1	1	0	0	0	3.9	105	26.6	43	1.2	64.9	65.69	0	0
708	3657	0	3657	0	3657	0	0	142	141.792	47	1	64	0	1	0	0	0	0	0	0	4	0	1	3	0	0	0	1	1	0	0	0	4.3	105	24.6	87	1.3	63	63.81	0	0
709	3437	0	3437	0	21	1	0	142	142.576	49	1	84.4	1	1	1	0	0	0	0	0	1	0	2	3	0	0	0	2	1	0	0	0	4.5	109	22.1	136	1.6	49.2	63.01	0	0
710	3624	0	3624	0	3624	0	0	143	143.192	52	2	56	0	1	0	0	0	0	0	0	4	0	1	3	0	0	0	2	1	0	0	0	4.9	106	28.2	112	0.8	80.2	55.88	0	0
711	3681	0	3681	0	3681	0	0	140	139.936	30	2	61	0	1	0	0	0	0	0	0	4	0	1	1	0	0	0	1	1	0	0	0	4	103	29.2	96	0.7	104.6	44.76	0	0
712	3354	0	3354	0	3354	0	0	142	142.752	40	2	63	0	1	0	0	0	0	0	0	4	0	1	1	0	0	0	1	1	0	0	0	4.7	105	29.6	147	0.7	98.7		0
713	3424	0	3424	0	3424	0	0	139	139.304	40	1	62.5	0	1	0	0	0	0	0	0	4	0	2	6	0	0	1	2	1	0	0	0	4.8	103	23.2	119	0.8	114	54.43	0	0
714	3340	0	3340	0	3340	0	0	139	138.248	44	2	53.9	0	0	0	0	0	0	0	1	4	0	3	7	0	0	1	2	1	0	0	0	4.1	105	23.7	53	0.9	72.4	65.52	0
715	3348	0	3348	0	#NULL!	1	0	139	138.728	37	2	59.4	0	0	0	0	0	0	1	0	4	0	2	4	0	0	1	1	1	0	0	0	4.2	111	21.6	83	0.9	75	58.56	0	0
716	784	0	784	0	784	0	0	142	142.112	33	1	64.6	0	1	0	0	0	0	1	0	4	0	1	0	0	0	0	1	1	0	0	0	3.9	106	26.9	107	1.2	74.2	53.79	0	0
717	3627	0	3627	0	3627	0	0	141	140.92	28	1	67	0	1	0	0	0	0	0	0	4	0	1	0	0	0	1	2	1	0	0	0	3.7	104	22.4	95	1.1	84.9	52.38	0
718	3326	0	3326	0	111	1	0	141	141.208	52	1	70	1	1	0	0	0	0	0	0	4	0	1	0	0	0	0	1	1	0	0	0	4.5	113	19.9	113	1.3	61.7		0
719	3385	0	3385	0	102	1	0	143	142.84	45	2	43.9	0	0	0	0	0	0	0	1	4	0	3	3	0	0	1	2	1	0	0	0	4.9	112	18.1	90	1	63.8	66.67		0
720	3402	0	3402	0	3402	0	0	142	141.792	41	2	51	0	1	0	0	0	0	0	0	4	0	3	3	0	0	1	2	1	0	0	0	3.8	109	24.1	87	1.4	44.1	54.59	0	0
721	3333	0	3333	0	2739	1	0	142	141.792	36	2	46.5	1	1	0	0	0	0	0	0	3	0	1	5	0	0	1	1	1	0	0	0	4	107	23.8	87	0.8	86.4	63.38	0	0
722	3351	0	3351	0	3351	0	0	141	140.68	41	1	58	0	0	0	0	0	0	0	0	4	0	1	2	0	0	0	1	1	0	0	0	4.1	102	30.4	80	1	87.7	62.35	0	0
723	3270	0	3270	0	3270	0	1	134	134.192	34	1	54.5	0	1	0	1	0	0	0	0	4	0	1	7	0	0	0	1	1	0	0	0	4	101	20.3	112	0.9	102.8	61	0	0
724	3354	0	1530	1	104	1	0	138	137.984	43	2	45.7	0	0	1	0	0	0	0	0	1	0	2	5	0	0	1	1	1	0	0	0	5.1	106	22.7	99	1.9	30.7	35	0
725	3352	0	3352	0	3352	0	0	143	143.176	57	1	75	0	1	1	0	0	0	0	0	1	0	2	1	0	0	0	1	1	0	0	0	5.1	105	26.5	111	0.7	123.7	64.55	0	0
726	355	0	355	0	355	0	0	141	140.856	39	2	60.9	0	1	1	1	0	1	0	0	4	0	2	2	0	0	1	1	1	0	0	0	3.8	109	21.8	91	1	65.7	59.55	0	0
727	3334	0	3334	0	435	1	0	140	139.808	22	1	60	0	0	0	0	0	0	0	0	4	0	1	3	0	0	0	1	1	0	0	0	4.7	107	23.1	88	1.1	89.1	54.89	0
728	3341	0	1470	1	1498	0	0	143	142.84	43	1	75	0	0	0	0	0	0	0	0	2	0	2	5	0	0	1	1	1	0	0	0	4.5	108	27.8	90	1.4	58.9	53.66	0	0
729	2080	0	2080	0	62	1	0	136	135.712	35	2	55	0	1	0	0	0	0	0	0	2	0	1	2	0	0	0	1	1	0	0	0	4.7	102	25.4	82	1.4	45.6	63.37	0
730	3308	0	3308	0	104	1	0	137	136.952	57	1	60.7	0	1	0	0	0	0	0	0	4	0	2	5	0	0	1	1	1	0	0	0	4.3	105	22.6	97	1.1	73.5	61.73	0
731	3347	0	3347	0	3347	0	0	141	140.792	27	1	58	0	1	0	0	0	0	0	0	4	0	1	1	0	0	0	1	1	0	0	0	4.6	104	26	87	1.1	85.5	68.31	0	0
732	3358	0	3358	0	3358	0	0	140	140.496	41	1	62.8	1	1	0	0	0	0	0	0	4	0	2	6	0	0	0	1	1	0	0	0	3.5	107	22.1	131	1.2	71	45.64	0	0
733	3353	0	3353	0	3353	0	0	139	138.952	34	2	47.6	0	1	0	0	0	0	0	0	4	0	2	6	0	0	1	1	1	0	0	0	4	107	22.1	97	1	67.6	58.76	0
734	168	0	168	0	168	0	0	143	142.888	27	1	77	0	1	1	0	0	0	0	0	4	0	2	4	0	0	1	1	1	0	0	0	4.2	103	32.8	93	1.2	77.3	55.29	0
735	3313	0	3313	0	36	1	0	141	140.824	27	2	57.1	0	1	0	0	0	0	0	0	2	0	1	3	0	0	0	2	1	0	0	0	4	104	23.6	89	1.4	48	70	1
736	3278	0	3278	0	3278	0	0	142	141.808	25	2	43.9	0	0	0	0	0	0	0	0	4	0	1	3	0	0	0	1	1	0	0	0	4.1	105	29.3	88	0.8	93	66.18	0	0
737	3290	0	3290	0	3290	0	0	145	144.808	61	1	67.9	0	1	0	0	0	0	0	0	4	0	2	3	0	0	1	1	1	0	0	0	4.5	109	27	88	1.8	41	71.88	0
738	3235	0	3235	0	2861	1	0	140	140.352	36	1	62	0	1	0	0	0	1	0	0	3	0	2	6	0	0	0	1	1	0	0	0	4.2	107	23.9	122	1.1	80.6		0
739	3241	0	3241	0	3241	0	0	133	135.736	48	1	71.5	1	1	0	0	0	1	1	0	4	0	2	4	0	0	1	2	1	0	0	0	4.3	98	24.6	271	0.9	95.9	64	0
740	3295	0	3295	0	3295	0	0	138	138.912	49	2	40	0	1	1	0	0	1	0	0	1	0	2	5	0	0	1	1	1	0	0	0	4.5	102	29.4	157	0.8	81.2	55.07	1	0
741	3285	0	3285	0	332	1	0	145	144.872	35	1	53.4	1	1	0	0	0	1	0	0	3	0	1	3	0	0	0	1	1	0	0	0	3.9	104	32.8	92	1.1	81.1	43.9	1	0
742	3176	0	3176	0	3176	0	0	145	144.648	46	1	68.5	0	1	0	1	0	0	0	0	4	0	2	5	0	0	0	1	1	0	0	0	3.7	106	27.5	78	1.1	76.7	40	0
743	3236	0	3236	0	3236	0	0	140	139.808	25	2	46.6	0	0	0	0	0	0	0	0	3	0	2	5	0	0	1	2	1	0	0	0	4.2	104	28.1	88	0.7	108.5		0
744	3256	0	3256	0	3256	0	0	142	141.76	34	2	46.7	0	1	0	0	0	0	0	0	4	0	1	0	0	0	0	1	1	0	0	0	3.8	104	28.7	85	0.8	87.4	59.26	0	0
745	3223	0	3223	0	78	1	0	143	143.368	30	2	49.8	0	1	0	0	0	0	0	0	4	0	1	1	0	0	0	1	1	0	0	0	4	106	30.2	123	1.1	62.1		0
746	3276	0	3276	0	3276	0	0	139	138.792	41	1	69.2	0	1	0	0	0	0	0	0	4	0	2	3	0	0	1	2	1	0	0	0	3.9	104	26.5	87	1.3	64.8	62.26	0	0
747	3213	0	3213	0	2244	1	0	145	144.104	31	1	80.4	0	1	0	0	0	0	0	0	3	0	1	3	0	0	0	1	1	0	0	0	3.3	108	28.3	44	1.5	58.1	61.36	0	0
748	3204	0	3204	0	3204	0	0	144	143.76	30	1	68.4	0	1	0	0	0	0	0	0	4	0	1	3	0	0	0	1	1	0	0	0	3.8	106	30.3	85	1.4	63.3	41.46	0	0
749	1634	1	1530	0	1539	0	0	137	136.472	54	2	50.8	0	0	0	0	0	0	0	0	2	0	1	2	0	0	0	2	1	0	0	0	4.8	103	27.6	67	1.2	49.8	66.67	0
750	3123	1	3123	0	292	1	0	137	139.208	25	1	82.5	0	1	0	0	0	0	0	0	4	0	2	2	0	0	0	1	1	0	0	0	4.7	104	26.4	238	1.4	65.7	62.63	0
751	1325	0	900	1	639	1	0	141	141.288	52	1	70.4	0	1	0	0	0	0	0	0	3	0	2	4	0	0	1	1	1	0	0	0	4.5	103	29.8	118	1.7	45.3	64.84	0	0
752	3178	0	3178	0	19	1	0	139	139	50	2	69	0	1	0	0	0	0	0	0	4	0	1	3	0	0	0	2	1	0	0	0	4.2	111	20.9	100	1.5	39.1	61.4	0
753	3148	0	3148	0	3148	0	0	142	141.904	33	2	46.5	0	1	0	0	0	0	0	0	4	0	1	0	0	0	0	1	1	0	0	0	4.7	103	30.3	94	1.2	55.1	60.19	0	0
754	3241	0	3241	0	3241	0	0	143	143.544	44	1	66.8	0	1	1	0	0	0	0	0	1	0	1	1	0	0	0	1	1	0	0	0	6	108	26.3	134	1.9	41.2	60	0	0
755	2812	0	2812	0	2812	0	0	141	140.6	21	2	46.3	0	1	0	0	0	0	1	0	3	0	3	3	0	0	1	2	1	0	0	0	5.8	110	23.9	75	2.1	31.6	64.71	0
756	3222	0	3222	0	3222	0	1	128	127.776	31	2	53.8	0	1	0	0	0	0	0	0	3	0	1	0	0	0	0	1	1	0	0	0	4.1	96	22	86	0.8	89.1	60	0
757	3218	0	3218	0	3218	0	0	141	140.968	32	1	50	0	1	0	0	0	0	0	0	4	0	2	4	0	0	1	2	1	0	0	0	4	113	22.6	98	1.3	68.1	55.41	0
758	3202	0	3202	0	3202	0	0	140	140.784	26	2	43.6	0	1	1	0	0	0	1	0	1	0	2	4	0	0	1	1	1	0	0	0	3.9	101	28.2	149	0.9	80.6	64	0	0
759	3223	0	3223	0	3223	0	0	141	140.744	41	2	59.5	0	1	0	0	0	0	0	0	3	0	1	3	0	0	0	1	1	0	0	0	4.1	103	28.1	84	1	65	50.91	0	0
760	3203	0	3203	0	32	1	0	139	140.184	35	1	59.6	1	1	0	0	0	0	0	0	2	0	1	3	0	0	0	2	1	0	0	0	4.8	99	29.6	174	2.1	38.5	61.86	0	0
761	2193	0	2193	0	1320	1	0	143	142.84	30	2	60.8	0	1	0	0	0	0	0	0	4	0	1	2	0	0	0	1	1	0	0	0	3.6	107	24.9	90	0.9	78.3	69.84	0	0
762	3162	0	3162	0	1686	1	0	143	143.224	51	1	66.2	0	1	0	0	0	0	0	0	4	0	1	3	0	0	1	2	1	0	0	0	5.2	109	24.7	114	1.3	62	61.86	0	0
763	3132	0	3132	0	21	1	0	143	142.984	50	2	53.9	0	0	0	0	0	0	0	0	1	0	2	3	0	0	0	2	1	0	0	0	4.9	110	24.2	99	2.1	26.5	64.89	0
764	3098	0	3098	0	3098	0	0	143	143.048	45	2	56.5	0	1	1	0	0	0	0	0	3	0	1	2	0	0	1	2	1	0	0	0	5.2	104	29.5	103	0.9	72.1	60.38	0
765	3201	0	3201	0	3061	1	1	134	133.888	43	1	65	0	1	0	0	0	0	0	0	3	0	3	3	0	0	1	2	1	0	0	0	5.5	109	20.5	93	1.5	54.4	62.14	0
766	3177	0	3177	0	3177	0	0	145	144.616	44	1	66.9	0	1	0	0	0	0	0	0	2	0	2	5	0	0	1	1	1	0	0	0	4.1	108	30	76	1.3	63.8	57.14	0	0
767	3173	0	3173	0	3173	0	0	145	144.92	52	1	64	1	1	0	0	0	0	0	0	1	0	2	4	0	0	1	2	1	1	0	0	5.3	112	27.1	95	1.8	42.4	70	0
768	3089	0	3089	0	3089	0	0	142	141.808	52	2	54	0	1	0	0	0	0	0	0	3	0	1	0	0	0	0	1	1	0	0	0	4.4	104	30	88	0.8	80.2	63.08	0	0
769	3163	0	3163	0	3163	0	0	143	142.84	28	1	74.2	1	1	0	0	0	0	0	0	2	0	2	4	0	0	0	1	1	0	0	0	4.6	106	28.7	90	1.6	55.1	58.96	0	0
770	3082	0	3082	0	3082	0	0	140	139.872	46	2	40.3	0	1	0	0	0	0	0	0	3	0	1	1	0	0	0	2	1	0	0	0	4	107	25.2	92	0.4	182.9	41.25		0
771	3086	0	3086	0	228	1	0	140	140.56	50	1	89.4	0	1	0	0	0	0	0	0	3	0	2	5	0	0	1	1	1	0	0	0	4.2	104	27.2	135	1.5	52.7	45.08	0	0
772	3142	0	2130	1	245	1	0	142	141.888	36	1	68.8	0	1	0	0	0	0	0	0	2	0	3	5	0	0	1	2	1	0	0	0	4	110	26.4	93	1.2	72.9	51.34	0	0
773	3117	0	3117	0	11	1	0	142	142.4	46	1	71.7	0	1	0	0	0	0	0	0	2	0	2	5	0	0	0	2	1	0	0	0	4.4	107	25.9	125	1.3	63.3	67.27	0
774	3130	0	3130	0	949	1	0	142	142.848	53	1	72.5	0	1	0	0	0	0	0	0	3	0	1	1	0	0	1	1	1	0	0	0	4.3	114	16.8	153	1.1	74.5		0
775	3141	0	3141	0	12	1	0	143	143.08	41	1	67.5	0	1	0	0	0	0	0	0	4	0	1	5	0	0	0	1	1	0	0	0	4.7	110	26.3	105	1.2	71	68.7	1	0
776	3102	0	3102	0	3102	0	0	144	143.76	43	1	62	0	1	0	0	0	0	0	0	3	0	1	3	0	0	0	1	1	0	0	0	4.4	106	29.5	85	1.2	70.3	45.16	0	0
777	3125	0	3125	0	3125	0	0	139	138.744	29	2	58	0	1	0	0	0	0	0	0	2	0	1	0	0	0	0	1	1	0	0	0	5.3	109	25.4	84	0.9	78.8	65.03	0	0
778	2801	0	2040	1	828	1	0	143	142.712	63	2	44.6	0	0	0	0	0	0	0	0	3	0	1	3	0	0	0	2	1	0	0	0	5.4	113	21.2	82	1.3	44	67.61	0	0
779	3026	0	3026	0	31	1	0	141	141.352	30	1	66.8	1	1	0	0	0	0	0	0	2	0	2	5	0	0	0	1	1	0	0	0	4.5	111	23.1	122	2.2	37.6	74.36	0	0
780	3066	0	3066	0	9	1	0	141	140.632	33	2	49.4	0	0	0	0	0	0	0	0	4	1	2	6	0	0	0	2	1	0	0	0	4	116	16.5	77			71.25	0	0
781	3090	0	3090	0	3090	0	0	140	139.856	39	1	60	1	1	0	0	0	0	0	0	2	0	3	2	0	0	1	2	1	0	0	0	4	111	23.7	91	1.2	71.8	62.14	0
782	3071	0	3071	0	3071	0	0	140	139.776	24	1	61.5	0	1	0	0	0	0	0	0	3	0	1	3	0	0	0	1	1	0	0	0	4.5	104	27.2	86	1.7	53	57.45	0
783	3040	0	3040	0	3040	0	0	140	140.16	45	1	75.7	0	1	0	0	0	0	0	0	3	0	1	7	0	0	0	1	1	0	0	0	4.4	108	23.6	110	1	86	58.18	0	0
784	3336	0	3336	0	3336	0	0	139	138.744	25	2	45	0	1	0	0	0	0	0	0	2	1	3	4	0	0	1	2	1	0	0	0	3.6	106	22.6	84			56.92	0	0
785	904	0	904	0	904	0	0	138	137.808	25	1	54	0	1	0	0	0	0	0	0	3	0	2	5	0	0	0	1	1	0	0	0	5.8	105	26.1	88	1.1	86.8	30.25	0	0
786	3081	0	3081	0	783	1	0	141	141.016	55	2	55	0	1	0	0	0	0	0	0	3	0	3	4	0	0	1	2	1	0	0	0	3.7	102	25.9	101	1.4	41.6	62.77		0
787	3025	0	3025	0	3025	0	0	143	142.808	35	1	73.6	1	1	0	0	0	0	0	0	3	0	1	4	0	0	0	1	1	0	0	0	4.7	109	24.2	88	1.1	81.1	55.96	0	0
788	3015	0	3015	0	3015	0	0	142	142.672	50	1	68.5	0	1	1	0	0	0	0	0	1	0	2	3	0	0	1	1	0	0	0	0	3.5	105	28.9	142	1.2	68.2	60.68	0	0
789	2597	0	2597	0	2597	0	0	140	141.792	56	1	65.4	0	1	1	1	0	0	0	0	3	0	1	2	0	0	0	1	1	0	0	0	4.9	100	32.5	212	1.2	66.7	63.79	0	0
790	2986	0	2986	0	2986	0	0	144	144.064	44	1	52.7	0	1	1	1	0	0	0	0	4	0	2	3	0	0	1	2	1	0	0	0	4.5	111	24.3	104	1.4	58.6	68.97	0	0
791	3270	0	3270	0	3270	0	0	143	142.984	44	2	61	0	1	0	0	0	0	0	0	3	0	1	4	0	0	0	1	1	0	0	0	3.7	104	27.5	99	0.8	83	66.3	0	0
792	3003	0	3003	0	3003	0	0	140	140.08	38	2	46.3	0	1	0	0	0	0	0	0	4	0	1	2	0	0	0	1	1	0	0	0	4.7	104	27.4	105	1	66.1	63.57	0	0
793	2936	0	2936	0	86	1	0	138	139.296	45	1	68.4	0	1	0	0	0	0	0	0	2	0	2	4	0	0	0	2	1	0	0	0	4.5	106	26.6	181	1.6	50	65.22	0	0
794	1901	1	2040	1	18	1	0	144	143.728	45	2	66	0	1	0	0	0	0	0	0	3	0	1	5	0	0	1	2	1	0	0	0	4.7	115	19.3	83	4.2	12.2	70	0	0
795	3000	0	3000	0	3000	0	0	141	140.808	27	1	55.6	0	1	0	0	0	0	0	0	3	0	1	3	0	0	0	1	1	0	0	0	4.3	107	25.2	88	1.2	77.3	62.35	0	0
796	3024	0	3024	0	3024	0	0	143	142.904	43	1	71	1	0	0	0	0	0	0	0	2	0	1	7	0	0	0	1	1	0	0	0	4.6	105	29	94	1.3	64.1	56.71	0	0
797	2997	0	2997	0	2997	0	0	141	140.744	52	1	60	0	1	0	0	0	0	0	0	2	0	1	2	0	0	0	1	1	0	0	0	3.9	107	24.1	84	1.2	67.7	72.15	0	0
798	3001	0	3001	0	3001	0	0	145	144.92	48	2	56.5	0	0	0	0	0	0	0	0	4	0	1	4	0	0	0	1	1	0	0	0	4.2	110	26.8	95	1.5	39.5	68.52	0	0
799	2976	0	2976	0	825	1	0	143	142.952	23	1	62	0	1	0	0	0	0	0	0	3	0	1	3	0	0	0	2	1	0	0	0	4.7	106	27.5	97	1.3	72.8	61.87	0	0
800	2857	0	810	1	823	0	0	141	141.144	49	1	60	0	1	0	0	0	0	0	0	4	0	1	4	0	0	0	1	1	0	0	0	4.4	105	27.8	109	0.9	95.5	60.27	0	0
801	2907	0	2907	0	2907	0	0	138	138.512	50	1	73	0	1	0	0	0	0	0	0	3	0	1	2	0	0	0	2	1	0	0	0	4.3	105	26.7	132	1.7	45.6	56.58	0
802	2989	0	2989	0	2989	0	0	143	143	57	1	51	0	1	1	0	0	0	0	0	1	0	1	3	0	0	0	1	1	0	0	0	4.9	108	28.1	100	0.7	123.7	65.67	0	0
803	2893	0	2893	0	20	1	0	141	140.744	41	2	55	0	1	0	0	0	0	1	0	4	0	1	5	0	0	0	1	1	0	0	0	4.4	104	28.7	84	0.8	84.2	59.18	0	0
804	2928	0	2928	0	2928	0	0	142	142.4	48	2	66	0	1	0	0	0	0	0	0	3	0	1	0	0	0	0	1	1	0	0	0	3.6	105	28.8	125	1.1	56.4	65.22	0	0
805	2960	0	2960	0	2960	0	0	143	142.744	34	2	44.6	0	1	0	0	0	0	0	0	2	0	2	5	0	0	1	2	1	0	0	0	4.1	107	29.4	84	1.2	54.7	70.42	0	0
806	2969	0	2969	0	332	1	0	140	139.984	45	1	61	1	1	0	0	0	0	0	0	2	0	1	3	0	0	0	2	1	0	0	0	4.7	108	23.6	99	0.7	129.8	63.75	0	0
807	2936	0	2936	0	2936	0	0	141	140.824	28	2	48.4	0	1	0	0	1	0	0	1	4	0	1	1	0	0	0	1	1	0	0	0	4	101	31.8	89	0.8	90.9	61.32	1	0
808	2868	0	2250	1	2031	1	0	141	140.968	27	1	46	0	1	0	0	0	0	0	0	2	0	3	4	0	0	1	1	1	0	0	0	3.8	110	22.9	98	0.8	123.4	60.81	0
809	2925	0	2925	0	55	1	0	137	137.176	21	1	63.5	0	1	0	0	0	0	0	0	2	0	1	3	0	0	0	1	1	0	0	0	5	112	20	111	2.5	34.9	70.19	0
810	2937	0	2937	0	2910	1	0	143	142.856	38	1	58.6	0	0	1	0	0	0	0	0	4	0	1	1	0	0	0	1	1	0	0	0	4.1	109	28.2	91	1.2	72.1	60.91	0
811	2929	0	2929	0	1181	1	0	143	143.08	52	2	83	0	0	0	0	0	1	0	0	4	0	1	1	0	0	0	2	1	0	0	0	3.8	104	32.9	105	1.1	55.5	65.79	1
812	2938	0	2938	0	2938	0	0	140	139.856	47	2	58	0	1	0	0	0	0	0	0	4	0	2	6	0	0	1	2	1	0	0	0	3.9	106	25.4	91	0.8	81.8	52.94	0	0
813	2936	0	2936	0	#NULL!	1	1	133	132.984	58	2	57.4	0	0	0	0	0	0	0	0	4	0	1	3	0	0	0	2	1	1	0	0	4.8	104	21.6	99	5.3	8.8	57.97	1	0
814	2927	0	2927	0	2927	0	0	137	139.416	33	1	58.7	0	1	0	0	0	0	0	0	4	0	3	7	0	0	1	2	1	0	0	0	4.1	103	24.2	251	1.9	43.7	58.88
815	2888	0	2888	0	2888	0	0	143	142.92	44	2	47	1	1	0	0	0	0	0	0	4	0	1	3	0	0	0	2	1	0	0	0	4.4	110	25.4	95	0.7	96.8	61.64		0
816	2884	0	2884	0	2884	0	0	141	142.28	50	2	74	0	1	1	0	0	0	0	0	3	0	2	5	0	0	0	2	1	0	0	0	4.4	105	26.3	180	1.3	46.2	69.64	0	0
817	2926	0	2926	0	2926	0	0	141	140.664	26	2	47	0	1	0	0	0	0	0	0	2	0	1	0	0	0	0	1	1	0	0	0	3.9	104	29.4	79	0.7	107.7	68.92	1	0
818	2868	0	2868	0	132	1	0	140	139.856	44	2	44.6	0	0	0	0	0	0	0	0	4	0	1	4	0	0	0	1	1	0	0	0	3.5	105	26.5	91	0.9	72.4	60.49	0
819	2936	0	2936	0	2335	1	0	145	144.6	38	2	37.6	0	0	0	0	0	0	0	0	3	0	1	3	0	0	0	1	1	0	0	0	3.9	114	28.1	75	0.7	99.7	56.9	0
820	1996	0	1080	1	1089	0	0	145	144.792	33	1	67.5	0	1	0	1	0	0	0	0	2	0	3	5	0	0	1	2	1	1	0	0	4.3	118	21.1	87	3.2	23.9	61.9
821	2896	0	2896	0	2896	0	0	141	141.448	45	1	55	0	1	0	0	0	0	0	0	4	0	3	5	0	0	1	2	1	1	0	0	4.1	109	22.6	128	3	24.2	61.18	0	0
822	341	0	341	0	341	0	0	142	141.792	20	1	67	0	0	0	0	0	0	0	0	3	0	1	3	0	0	0	1	1	0	0	0	4.2	107	26	87	1.2	82.2	46.11	0	0
823	2228	0	2228	0	48	1	0	140	140.752	47	2	49	0	1	0	0	0	0	0	0	2	0	1	2	0	0	0	1	1	0	0	0	4.3	112	23	147	2.2	25.5	61.54	0
824	2847	0	2847	0	742	1	0	137	137.24	45	1	70	1	1	0	0	0	0	0	0	4	0	3	4	0	0	1	2	1	1	0	0	4.1	105	25.4	115	1.9	41	64.06	0	0
825	2898	0	2898	0	2898	0	0	143	142.968	43	1	67.4	0	0	0	0	0	0	0	0	2	0	1	2	0	0	0	1	1	1	0	0	3.9	106	29.1	98	1.5	54.4	68.5	0
826	2865	0	2865	0	75	1	0	141	140.888	24	1	65.3	0	1	0	0	0	0	0	0	4	0	1	2	0	0	0	2	1	0	0	0	4	108	25.8	93	1.4	66.3	60.92	0
827	2826	0	2826	0	2826	0	0	141	140.792	40	1	62.5	1	0	0	0	0	0	0	0	4	0	1	4	0	0	0	2	1	0	0	0	4.1	103	31	87	1.6	51.2	62.22	0	0
828	2853	0	2853	0	117	1	0	139	139.352	40	2	65	0	1	0	0	0	0	0	0	4	0	2	5	0	0	0	1	1	0	0	0	3.8	105	26.5	122	1.1	58.6	57.6	0	0
829	2881	0	390	1	400	1	0	145	144.776	25	2	70.6	0	1	0	0	0	0	0	0	4	0	2	5	0	0	1	2	1	0	0	0	4.1	106	26.6	86	0.9	81.2	68.92	0	0
830	2649	0	2649	0	2649	0	0	142	142.528	36	1	59	1	1	0	0	0	0	0	0	4	0	1	0	0	0	0	1	1	0	0	0	4.4	104	31.6	133	1.2	72.9	67.91	0	0
831	2892	0	2892	0	2892	0	0	144	143.632	54	1	53.6	0	1	1	0	0	0	0	0	1	0	1	3	0	0	0	1	1	0	0	0	4.2	107	24.3	77	1.3	61.2	63.16	0	0
832	2886	0	2886	0	21	1	0	144	143.456	31	2	46	0	1	0	0	0	0	0	0	3	0	1	2	0	0	0	2	1	0	0	0	4.4	111	22.2	66	0.7	103.9	71.43	0	0
833	2797	0	2797	0	1418	1	0	142	141.856	31	1	68.5	1	0	0	0	0	0	0	0	2	0	1	4	0	0	0	1	1	0	0	0	3.7	106	24.9	91	1.3	68.5		0	0
834	2878	0	2878	0	2878	0	0	138	137.888	30	2	40	0	1	0	0	0	0	0	0	4	0	1	4	0	0	0	1	1	0	0	0	4.9	107	23.5	93	1	69.3	60.61	0
835	2560	0	390	1	#NULL!	1	0	139	139	39	2	77	0	1	0	0	0	0	0	0	3	0	1	2	0	0	0	1	1	0	0	0	6.1	115	22.8	100	1	65.7	66.23	0	0
836	2753	0	2753	0	2753	0	0	144	143.984	27	1	62	1	1	0	0	0	0	0	0	3	0	2	6	0	0	1	2	1	0	0	0	4.6	104	33.8	99	1.7	51.7	60.23	0	0
837	2763	0	2763	0	#NULL!	1	0	144	143.824	51	2		0	1	0	0	0	0	0	0	4	0	3	7	0	0	0	1	0	0	0	0	4.2	108	29.5	89	1	62.2	67.01	0	0
838	2816	0	2816	0	2816	0	0	144	143.808	44	1	55	0	1	0	0	0	0	0	0	2	0	1	0	0	0	0	1	1	0	0	0	4.2	104	32.4	88	1	86.4	66.67	0	0
839	2047	0	2047	0	246	1	0	143	143	45	1	63	0	1	0	0	0	0	0	0	3	0	3	5	0	0	1	2	1	0	0	0	4.8	106	30	100	1	86	61.29	0	0
840	358	0	358	0	97	1	1	135	134.92	63	1	70	0	1	0	1	0	0	0	0	3	0	1	3	0	0	0	2	1	0	0	0	4.7	105	20.8	95	1.6	46.7	69.3	1	0
841	2743	0	2743	0	2743	0	0	144	143.888	50	1	69	1	1	0	0	0	0	0	0	3	0	3	3	0	0	1	2	1	0	0	0	5	111	26.5	93	1.3	62.2	57.73	0
842	2750	0	2750	0	2750	0	0	143	142.792	24	2	69	0	1	1	0	0	0	0	0	3	0	1	2	0	0	1	2	1	0	0	0	4.2	109	30.4	87	1.5	45.4	46.15	1	0
843	2784	0	2784	0	2784	0	0	142	142.096	53	2	55	0	1	0	0	0	0	0	0	3	0	2	6	0	0	1	2	1	0	0	0	4	104	27.8	106	0.7	93.2	63.64	0
844	2703	0	2703	0	991	1	0	139	139.272	36	2	49	0	1	0	0	0	0	0	0	4	0	2	4	0	0	1	1	1	0	0	0	4.7	115	19.7	117	0.9	75.4	66.27	0
845	2768	0	2768	0	2768	0	0	137	138.808	55	1	53	0	1	1	0	0	0	0	0	1	0	1	2	0	0	1	1	1	0	0	0	6.1	103	21.5	213	1.3	61	64.95	0	0
846	2674	0	2610	1	1110	1	0	143	142.856	24	1	68	1	1	0	0	0	0	0	0	2	0	1	2	0	0	0	1	1	0	0	0	4.2	103	30.3	91	1.5	61.2	43.75	0	0
847	2751	0	2751	0	2751	0	0	139	139.32	44	2		0	1	0	0	0	0	0	0	4	0	3	7	0	0	1	2	0	0	0	0	4.2	104	29.6	120	0.9	72.4	75		0
848	2751	0	2751	0	7	1	0	138	138.064	51	2	73	0	1	0	0	0	0	0	0	3	0	3	6	0	0	1	2	1	0	0	0	4.8	113	20.1	104	1.2	50.4	58.33	0
849	1395	0	1395	0	#NULL!	1	0	141	143.832	59	2	62	0	1	1	0	0	0	0	0	1	0	1	2	0	0	1	2	1	0	0	0	4.4	108	27.9	277	0.8	78.2	37.78	1	0
850	2721	0	2721	0	2721	0	0	141	140.824	36	1	59.4	1	1	0	0	0	0	0	0	3	0	1	0	0	0	0	1	1	0	0	0	4.2	104	30.6	89	1.3	66.5	54.95	0	0
851	2685	0	2685	0	2685	0	0	141	141.064	47	1	70	0	1	1	0	0	1	0	0	1	0	1	3	0	0	0	1	1	0	0	0	4	103	29.1	104	0.9	96.3	53.79	0	0
852	2712	0	2712	0	#NULL!	1	0	140	140.688	38	2	45	0	0	0	0	0	0	0	0	4	0	2	4	0	0	0	2	1	0	0	0	4.1	105	27.7	143	0.8	85.5	61.36	1	0
853	2709	0	2709	0	9	1	0	142	142.08	47	2	61	0	1	1	0	0	0	0	0	3	0	2	5	0	0	0	2	1	0	0	0	3.6	104	29.8	105	1	63.3	57.33	0	0
854	2747	0	2747	0	2747	0	0	141	141.288	63	1	62	1	0	0	0	0	0	0	0	1	0	1	2	0	0	1	1	1	0	0	0	4.8	108	28.1	118	1.5	50.3	60.92	0	0
855	2668	0	2668	0	2668	0	0	138	137.904	49	1	74	0	1	0	0	0	1	0	0	3	0	1	0	0	0	0	1	1	0	1	0	4.9	105	24.7	94	1.4	57.3	57.58	1	0
856	2712	0	2712	0	2712	0	0	137	136.936	43	2	51	0	1	0	0	0	0	0	0	3	0	1	3	0	0	0	1	1	0	0	0	4.6	109	23.2	96	1	64.4	60.29	0
857	2524	0	2524	0	2524	0	1	121	132.28	42	1	62	1	0	0	0	0	0	0	0	4	0	1	7	0	0	0	1	1	0	0	0	5.8	93	20.3	805	1	87.2	61.97	0
858	2704	0	2704	0	2704	0	0	141	140.632	44	1	52	1	1	1	0	0	0	0	0	4	0	2	6	0	0	0	1	1	0	0	0	3.7	114	20.3	77	0.7	130.4	63.04	0	0
859	2686	0	2686	0	96	1	0	143	143.128	27	1	69	0	1	0	0	0	0	0	0	3	0	1	3	0	0	1	1	1	0	1	0	4.1	108	26.6	108	1.4	64.7	63.64	0	0
860	2715	0	2715	0	66	1	0	143	142.84	44	1	75	0	0	0	0	0	0	0	0	2	0	1	4	0	0	0	2	1	0	0	0	4.7	108	23.3	90	1.6	50.2	58.97	0	0
861	2672	0	2550	1	2160	1	0	142	142.096	47	1	66	1	0	0	0	0	0	0	0	4	0	2	4	0	0	0	2	1	0	0	0	4.4	103	29.8	106	1.3	63	59.8	0	0
862	2684	0	2684	0	2684	0	0	145	144.776	33	1	68	1	1	0	0	0	0	0	0	4	0	1	4	0	0	0	1	1	0	0	0	4	104	29.5	86	0.8	118.5	61.97	0	0
863	2693	0	2693	0	2693	0	0	141	141.784	64	1	56	1	1	1	1	0	0	0	0	1	0	2	5	0	0	1	1	1	0	0	0	5	106	25.5	149	1.2	64.9	56.79	0	0
864	2626	0	2626	0	2626	0	0	139	139.64	55	1	55	0	1	0	0	0	0	0	0	4	0	3	5	0	0	1	2	1	0	0	0	3.9	104	24.4	140	1.2	66.9	58.59	0
865	2674	0	2674	0	2674	0	0	134	137.504	48	2	46	0	1	1	0	0	0	0	0	1	0	1	2	0	0	1	2	1	0	0	0	5.4	99	28.2	319	0.7	95.1	69.23	0	0
866	2698	0	2698	0	1596	1	0	136	135.472	65	2	63	0	1	0	0	0	0	0	0	4	0	1	3	0	0	1	2	1	0	0	0	4.1	100	25.7	67	0.9	66.9	66.67	1	0
867	285	0	285	0	285	0	0	140	139.952	34	1	63	1	1	0	0	0	0	0	0	4	0	1	5	0	0	0	2	1	0	0	0	4.5	102	30.7	97	1.3	67.3	54.81	0	0
868	2676	0	2676	0	2676	0	0	141	140.888	27	1	62	1	1	0	0	0	0	0	0	2	0	1	2	0	0	1	1	1	0	0	0	4.2	108	26.8	93	1.6	55.5	54.47	0	0
869	2685	0	2685	0	900	1	0	145	144.728	54	1	50	0	1	0	0	0	0	1	0	1	0	1	3	0	0	0	1	1	0	0	0	4.2	106	31.5	83	1.2	67.2	63.01	0
870	2670	0	2670	0	68	1	0	141	140.968	26	1	72	0	1	0	0	0	0	0	0	3	0	1	2	0	0	0	2	1	0	0	0	5.7	103	33.1	98	1.8	48.8	60	0
871	2659	0	2659	0	1306	1	0	140	140.64	43	1	58	0	0	0	0	0	0	0	0	4	0	1	2	0	0	0	1	1	0	0	0	4.9	106	27	140	1.2	70.3	63.25	0
872	2641	0	2641	0	#NULL!	1	0	141	141.048	31	2	53	0	0	0	0	0	0	0	0	4	0	2	4	0	0	1	2	1	0	0	0	4.5	111	22.9	103	1.1	61.7	58.68	0	0
873	2666	0	2666	0	87	1	0	141	141.592	50	2	49	0	0	0	0	0	0	0	0	4	0	1	3	0	0	0	1	1	0	0	0	4.8	105	28.8	137	0.8	80.8	69.07	0	0
874	2590	0	2590	0	2590	0	1	134	134.864	46	2	44	0	1	0	0	0	0	0	0	4	0	1	3	0	0	0	1	1	0	0	0	4.2	103	23.7	154	1.2	51.5	59.21	1
875	2615	0	2615	0	#NULL!	1	0	137	140.712	50	1	59	1	1	1	0	0	1	0	0	3	0	1	2	0	0	1	1	1	0	0	0	5.1	104	23.9	332	0.8	108.9	65.26	0
876	2611	0	2611	0	92	1	0	140	139.792	49	1	57	0	0	0	0	0	0	0	0	4	0	2	4	0	0	1	1	1	0	0	0	4.2	110	22.6	87	1.2	68.5	60	0	0
877	2609	0	2609	0	2609	0	0	142	142	45	2	43	0	1	0	0	0	0	0	0	4	0	3	4	0	0	0	2	1	0	0	0	4.1	107	29.9	100	0.8	82.6	61.18	0
878	2608	0	2608	0	2629	1	0	141	140.696	49	2	60	0	1	0	0	0	0	0	0	2	0	1	3	0	0	1	1	1	0	0	0	4	105	29	81	1.1	56.2	57.47	0	0
879	2544	0	2544	0	2544	0	0	139	139.464	34	2	52.7	0	1	0	0	0	0	0	0	2	0	1	0	0	0	0	1	1	0	0	0	4.7	107	25.4	129	0.8	87.4	58.72	0
880	2608	0	2608	0	2608	0	0	142	141.744	50	1		1	1	1	0	0	0	0	0	4	0	1	7	0	0	1	1	0	0	0	0	4.1	103	30.6	84	1.4	57.1	56.82	0	0
881	2538	0	2538	0	2538	0	0	139	139.336	61	1	49	0	1	0	0	0	0	1	0	3	0	1	3	0	0	0	1	1	0	0	0	4.9	106	28.7	121	1.3	59.7	60.76	0	0
882	2571	0	2571	0	2571	0	0	141	140.984	47	2	47	0	1	0	0	0	0	0	0	4	0	3	6	0	0	1	2	1	0	0	0	4.9	110	22	99	1	63.3	66.1	0	0
883	2250	1	2250	0	2250	0	0	144	143.824	63	1		0	1	1	0	0	0	0	0	4	0	3	7	0	0	1	1	0	0	0	0	4.2	110	26.6	89	1.1	72	69.46	0	0
884	2581	0	2581	0	30	1	0	135	137.88	59	1	64	0	1	0	0	0	0	0	0	1	0	1	2	0	0	0	2	1	0	0	0	6.6	110	19	280	4.6	14	61.26	0	0
885	2602	0	2602	0	615	1	0	144	143.92	28	1	68.8	0	1	0	0	0	0	0	0	4	0	1	2	0	0	0	1	1	0	0	0	4.5	107	27.8	95	1.4	64.2	74.38	0	0
886	2553	0	2553	0	2553	0	0	141	140.888	47	2	58	0	1	0	0	0	0	0	0	3	0	1	1	0	0	1	1	1	0	0	0	4	109	24.6	93	0.7	95.5	57.65	0	0
887	2545	0	2545	0	#NULL!	1	0	141	141.448	35	1	66.8	0	1	0	0	0	1	0	0	4	0	1	4	0	0	1	2	1	0	0	0	4	103	31.7	128	1	90.5	52.8	0	0
888	2556	0	2556	0	2556	0	0	141	141.464	43	1	80	0	1	0	0	0	0	0	0	2	0	2	5	0	0	0	2	1	0	0	0	4.2	104	28.4	129	0.8	112.3	56.07	0
889	1037	0	1037	0	1037	0	0	142	142.016	25	2	41.8	0	0	0	0	0	0	0	0	4	0	1	3	0	0	0	2	1	0	0	0	4.1	103	32.9	101	0.9	81.2	56	0
890	2598	0	2598	0	2598	0	0	139	138.808	35	2	58	0	1	0	0	0	0	0	0	2	0	2	5	0	0	1	1	1	0	0	0	5.2	105	26.9	88	0.8	86.9	69.32	0
891	2570	0	2570	0	2409	1	0	144	144.304	40	1	85	1	1	0	0	0	0	0	0	3	0	2	3	0	0	1	1	1	0	0	0	4.4	107	28.4	119	0.9	99.5	64.29	0	0
892	2583	0	2583	0	#NULL!	1	0	132	141.04	45	1	66	1	1	0	1	0	0	0	0	2	0	2	6	0	0	1	1	1	0	0	0	5.8	104	23.7	665	1.1	77.1	55.79	0	0
893	2595	0	2595	0	101	1	1	133	132.952	28	2	54	0	1	0	0	0	0	0	0	2	0	1	3	0	0	1	2	1	0	0	0	4.6	99	26.8	97	1.3	51.9	45	0	0
894	137	1	137	0	137	0	0	137	138.024	50	2	53	0	0	0	0	0	0	0	0	3	0	2	7	0	0	1	1	1	0	0	0	4.5	111	21.3	164	1.3	46.2	71.91	0
895	2542	0	2542	0	547	1	0	143	142.968	39	1	52	0	1	0	0	0	0	0	0	3	0	3	3	0	0	1	1	1	0	0	0	4	100	32.6	98	0.9	100	59.5	0	0
896	2500	0	2500	0	#NULL!	1	0	145	144.84	57	2	41	0	1	0	0	0	0	0	0	3	0	3	6	0	0	1	2	1	0	0	0	4.4	104	31.8	90	1.4	41.3	60.61	0	0
897	2199	0	2199	0	1828	1	0	138	138.064	45	1	68	0	1	0	0	0	0	0	0	4	0	3	5	0	0	0	1	1	0	0	0	4.7	105	26	104	0.9	97.1	57.63	0	0
898	2578	0	2578	0	177	1	0	140	139.952	28	1	60	0	1	0	0	0	0	1	0	4	0	1	3	0	0	1	2	1	0	0	0	4.7	111	24	97	0.9	107	65.31	0	0
899	2509	0	2509	0	2509	0	0	142	141.872	50	1		0	1	0	0	0	0	0	0	4	0	3	7	0	0	0	2	0	0	0	0	4.1	103	29.3	92	2.6	28	68.57	0	0
900	2542	0	2542	0	2542	0	0	140	140.048	49	1	55	0	1	0	0	0	0	0	0	3	0	1	3	0	0	1	1	1	0	0	0	4.4	105	29	103	1	84.5	56.82	0	0
901	2482	0	2482	0	2482	0	0	144	143.92	49	2		0	1	1	0	0	0	0	0	4	0	3	7	0	0	1	1	0	0	0	0	4.4	106	30	95	1.6	36.5	63.89	0	0
902	2577	0	2577	0	2577	0	0	141	142.264	54	2		0	1	0	0	0	0	0	0	4	0	3	7	0	0	0	1	0	0	0	0	4.9	105	28.4	179	1.2	49.8	63.83	0	0
903	2574	0	2574	0	2574	0	0	135	135.4	65	1	59	0	1	0	0	0	0	0	0	3	0	1	1	0	0	1	1	1	0	0	0	4.7	105	22.8	125	1.8	40.5		0	0
904	1290	0	1290	0	1290	0	0	143	142.872	43	1	70	1	1	0	0	0	0	0	0	3	0	1	3	0	0	1	1	1	0	0	0	4.2	108	27.8	92	0.9	98	60.44	0	0
905	2491	1	2491	0	1695	1	1	131	133.512	29	2	54	0	1	1	0	0	0	0	0	1	0	2	3	0	0	1	2	1	0	0	0	4.5	97	25.4	257	1.2	56.5	56.43	0
906	2559	0	2559	0	2559	0	0	142	141.824	27	2	49	0	1	0	0	0	0	0	0	3	0	1	2	0	0	0	1	1	0	0	0	4.7	106	29.2	89	0.7	106.9	54.65	0	0
907	2564	0	2564	0	867	1	0	143	143.256	53	1	65	0	1	0	0	0	0	0	0	3	0	2	6	0	0	0	2	1	0	0	0	3.4	103	34.1	116	0.8	107.7	66.96	0
908	2545	0	2545	0	2545	0	0	142	141.984	20	2	59	0	0	0	0	0	0	0	0	3	0	1	2	0	0	0	2	1	0	0	0	4.2	106	27.5	99	1.1	67.4	56.78	1	0
909	2519	0	2519	0	2519	0	0	140	140.16	38	1	60	0	1	0	0	0	0	0	0	3	0	2	6	0	0	0	2	1	0	0	0	4.6	109	28	110	0.9	100.5	61	0	0
910	2545	0	2545	0	2545	0	0	141	141.08	47	1	47	0	0	0	0	0	0	0	0	4	0	3	0	0	0	0	2	1	0	0	0	5.1	109	26.4	105	3.2	22.3	54.12	0	0
911	2520	0	2520	0	2520	0	0	138	137.616	39	2	58	0	0	1	1	0	0	0	0	4	0	2	5	0	0	1	1	1	0	0	0	4.3	103	24.5	76	0.8	85	64.89	0	0
912	2531	0	2531	0	2531	0	0	136	139.616	31	1	63	0	1	0	0	0	0	0	0	2	0	3	4	0	0	1	2	1	0	0	0	4.1	101	28.3	326	2.2	37.4	62.62	0	0
913	2489	0	2489	0	2489	0	1	134	134.64	38	2	48	0	0	1	0	0	0	0	0	4	0	1	2	0	0	1	1	1	0	0	0	3.8	104	21.4	140	1.1	59.2	67.86	0	0
914	2817	0	2817	0	2817	0	0	138	137.76	48	2	46	0	1	0	0	0	0	0	0	3	0	3	3	0	0	1	2	1	0	0	0	4	103	26.1	85	0.7	95.1		0	0
915	2509	0	2509	0	2509	0	0	135	136.632	60	2	66	0	1	0	0	0	0	0	0	1	0	2	3	0	0	1	2	1	0	0	0	5.1	101	25.7	202	1	60.2	59.6	1	0
916	2763	0	2763	0	15	1	0	143	142.968	38	1	64	0	0	0	0	0	0	0	0	4	0	1	4	0	0	1	2	1	0	0	0	4.6	106	29.8	98	1	89	70	0	0
917	2733	0	2733	0	2733	0	0	143	142.744	45	1	49	0	1	0	0	0	0	0	0	4	0	2	2	0	0	1	1	1	0	0	0	4.1	107	28.9	84			67.77	0	0
918	2522	0	2522	0	13	1	0	142	141.84	22	1	57	0	1	0	0	0	0	0	0	2	0	1	4	0	0	1	2	1	0	0	0	3.9	117	17.9	90	1.6	57.8	56.45	0
919	2478	0	2478	0	2478	0	0	140	139.776	45	1	70	0	1	1	0	0	0	0	0	1	0	1	6	0	0	1	1	1	0	0	0	3.5	100	30.9	86	1.2	69.7	66.95	0	0
920	2519	0	2519	0	2519	0	0	141	141.304	32	1	90.8	1	0	1	0	0	0	0	0	3	0	1	2	0	0	1	1	1	0	0	0	4.2	109	24.6	119	1.3	68.1	69.83	0	0
921	2526	0	2526	0	2526	0	0	139	138.264	37	1	60	0	1	0	0	0	0	0	0	1	0	1	2	0	0	0	1	1	0	0	0	5.5	112	20.5	54	1	89.5	54.73	0	0
922	2428	0	2428	0	2428	0	0	139	139.048	29	1	78	1	1	0	0	0	0	0	0	2	0	1	3	0	0	1	1	1	0	0	0	4.7	109	20.2	103	0.9	106.2	62.5	1	0
923	2447	0	2447	0	2447	0	0	143	143.08	43	2	54	0	0	0	0	0	0	0	0	3	0	1	2	0	0	1	1	1	0	0	0	3.9	107	28.4	105	1.5	40.3	58.93	0	0
924	2796	0	2796	0	2796	0	0	139	140.152	27	1		0	0	0	0	0	0	0	0	4	0	3	7	0	0	0	2	0	0	0	0	4.6	104	28	172	1.1	85.5	68.97	0	0
925	2505	0	2430	1	478	1	0	140	139.616	59	2	59	0	0	0	0	0	0	0	0	4	0	1	3	0	0	0	1	1	0	0	0	5	108	27.6	76	0.6	108.9	62.07	0	0
926	2451	0	2451	0	2451	0	0	143	142.84	59	1	69	1	1	0	0	0	0	0	0	4	0	1	2	0	0	1	2	1	0	0	0	4.5	106	27.8	90	1.1	72.9	61.54	0	0
927	2484	0	2484	0	2484	0	0	142	142.176	45	2	46	0	1	0	0	0	0	0	0	3	0	1	2	0	0	1	2	1	0	0	0	3.9	105	32.9	111	0.8	82.6	69.12	0	0
928	2504	0	2504	0	2504	0	0	142	141.84	32	2	44	0	1	0	0	0	1	0	0	2	0	1	3	0	0	1	1	1	0	0	0	4.1	104	35.5	90	0.8	88.5	58.56	0	0
929	2376	0	2376	0	2376	0	0	139	138.936	57	1	67	1	1	0	1	0	1	0	0	4	0	2	3	0	0	1	1	1	0	0	0	4.5	103	27.8	96	1.6	47.7	49.18	0	0
930	2386	0	2386	0	#NULL!	1	0	141	141.736	52	1	71	1	0	1	0	0	0	0	0	1	0	2	6	0	0	1	2	1	0	0	0	4.8	106	25.4	146	1.4	56.7	66.67	0	0
931	2471	0	2471	0	79	1	0	139	139.544	63	2	67	0	1	0	0	0	0	0	0	4	0	1	1	0	0	1	2	1	0	0	0	3.7	107	23.7	134	1.5	37.3	67.8	0	0
932	2435	0	2435	0	2435	0	0	142	141.92	51	2	60	0	0	0	0	0	0	0	0	4	0	1	0	0	0	1	1	1	0	0	0	4.2	108	26.4	95	1.1	55.7	62.63	0	0
933	2727	0	2727	0	2727	0	0	138	137.952	56	1	68	0	1	0	0	0	0	0	0	4	0	1	2	0	0	1	2	1	0	0	0	4.6	105	25.4	97	1.3	60.8		0	0
934	2449	0	2449	0	81	1	0	140	141.536	54	1	55	0	1	0	0	0	0	0	0	4	0	2	3	0	0	1	1	1	0	0	0	3.5	115	15.9	196	1.1	74.3	60.22	0	0
935	2461	0	2461	0	2461	0	0	144	143.76	25	1	91	1	1	0	0	0	0	0	0	4	0	2	5	0	0	1	2	1	0	0	0	4.6	111	25.3	85	1.2	78.5	65.38	0	0
936	2392	0	2392	0	2392	0	0	140	140.288	50	2	70	0	1	0	0	0	0	0	0	2	0	2	4	0	0	1	1	1	0	0	0	3.5	102	28	118	1.2	50.6	58.57	0	0
937	2397	0	2397	0	2397	0	0	144	143.744	35	2		0	0	0	0	0	0	0	0	4	0	3	7	0	0	1	2	0	0	0	0	4	107	27.6	84	0.6	121.1	65.26	0	0
938	1107	0	1107	0	1107	0	0	140	140.032	44	1	70	0	1	0	0	0	0	0	0	3	0	3	4	0	0	1	2	1	0	0	0	4.6	108	25.3	102	1.3	63.8	65.89	0	0
939	2470	0	1560	1	1583	1	0	139	138.968	51	1	72	1	1	0	1	0	0	0	0	3	0	2	3	0	0	1	1	1	0	0	0	3.7	105	23.4	98	1	83.9	57.14	1	0
940	2466	0	2466	0	2466	0	0	140	139.712	33	1	55	0	1	0	0	0	0	0	0	3	0	2	3	0	0	1	1	1	0	0	0	4.6	114	19.1	82	1.4	62.1	61.16	0	0
941	2448	0	2448	0	#NULL!	1	0	142	144.352	41	1	56	1	0	0	0	0	0	0	0	4	0	1	0	0	0	0	1	1	0	0	0	4.4	104	26.2	247	0.9	99	57.72	0
942	2424	0	2424	0	262	1	0	143	142.68	41	1	55	0	1	1	1	0	0	0	0	1	0	2	3	0	0	1	2	1	0	0	0	5.1	114	23.4	80	1.2	71	50	0	0
943	2444	0	2444	0	2444	0	0	139	140.232	44	1	80	0	1	0	0	0	0	0	0	4	0	2	6	0	0	0	2	1	0	0	0	3.7	105	24.3	177	1.1	77.4	64.39	1	0
944	2455	0	2455	0	2455	0	0	137	140.552	61	1	58	0	1	1	0	0	0	0	0	1	0	2	2	0	0	0	1	1	0	0	0	4.2	102	27.2	322	1.3	59.7	60.61	0	0
945	2673	0	2250	1	2250	0	0	141	140.664	45	2	67	0	1	0	0	0	0	0	0	4	0	2	5	0	0	1	2	1	0	0	0	4.1	109	25.1	79	0.7	96.3	66.27	0	0
946	2373	0	2373	0	2373	0	0	137	137.864	59	2	53	0	0	0	0	0	0	0	0	4	0	2	5	0	0	0	2	1	0	0	0	4.2	107	21.6	154	0.7	91.2	60	0	0
947	2399	0	2399	0	2399	0	0	141	141.192	37	1	68.5	0	1	0	0	0	0	0	0	2	0	2	3	0	0	1	2	1	0	0	0	4.2	105	26.1	112	1.2	72.5	66.15	1
948	2417	0	2417	0	2417	0	0	136	138.352	54	1		0	1	0	0	0	0	0	0	4	0	3	7	0	0	1	2	0	0	0	0	3.4	104	24.6	247	1	82.9	64.35	1	0
949	2406	0	2406	0	2406	0	0	138	137.936	47	1	81	0	1	0	0	0	0	0	0	3	0	2	0	0	0	1	2	1	0	0	0	4.8	106	25.7	96	1.1	76.4	56.47	0	0
950	2409	0	2409	0	2409	0	0	139	139.864	29	2	46	0	0	0	0	0	0	0	0	3	0	1	0	0	0	1	1	1	0	0	0	4.4	115	23.7	154	0.8	90.3	63.75	0
951	2402	0	870	0	2100	1	0	139	139.512	37	1	60	0	1	0	0	0	0	0	0	3	0	1	3	0	0	1	2	1	0	0	0	3.8	105	25.2	132	1	89.5	60.13	0	0
952	2409	0	2409	0	2409	0	0	140	140.16	53	2	51	0	1	0	0	0	0	0	0	1	0	1	1	0	0	1	1	1	0	0	0	4.2	105	24.9	110	1	61.7	67.24	0	0
953	2391	0	2391	0	2391	0	0	140	140.144	47	2	60	0	1	0	0	0	0	0	0	3	0	1	2	0	0	0	2	1	0	0	0	4.8	105	27.3	109	0.7	95.5	62.16	0	0
954	2355	0	2355	0	#NULL!	1	0	140	140.4	41	1	55	0	1	0	0	0	1	0	0	3	0	3	2	0	0	1	2	1	0	0	0	4.7	107	21.7	125	1.2	71	60.82	0	0
955	2387	0	2387	0	14	1	0	137	138.264	45	2	60	0	1	1	0	0	0	0	0	1	0	1	3	0	0	0	2	1	0	0	0	4.3	103	26.5	179	0.9	72.1	50	0	0
956	2352	0	2352	0	2352	0	0	142	141.744	51	1	51	0	1	0	0	0	0	0	0	3	0	2	4	0	0	1	1	1	0	0	0	4.4	111	21.2	84	1.2	68	58.46	0
957	2358	0	2358	0	2358	0	0	142	142	54	2	63	1	1	0	0	0	0	0	0	1	0	2	2	0	0	0	2	1	0	0	0	4.7	103	29.3	100	0.9	69.5	63.54	0
958	2382	0	2382	0	91	1	0	138	140.816	50	1	78	0	1	1	0	0	0	0	0	1	0	1	3	0	0	0	2	1	0	0	0	4.6	101	27.5	276	1.1	75.4	60.76	0	0
959	2316	0	2316	0	#NULL!	1	0	139	138.824	28	1	81	1	0	1	1	0	0	0	0	3	0	1	0	0	0	0	1	1	0	0	0	4.6	102	26	89	1.2	76.7	69.19	1	0
960	2380	0	2380	0	2380	0	0	142	141.856	48	1	70	0	1	0	0	0	0	0	0	3	0	2	2	0	0	0	2	1	0	0	0	3.9	106	27.7	91	1.7	46	64.29	0	0
961	2340	0	2340	0	2340	0	0	142	141.6	60	2	56	0	1	0	0	0	0	0	0	3	0	1	2	0	0	1	1	1	0	0	0	3.6	107	25.1	75	0.6	108.6	60.61	0	0
962	332	0	332	0	332	0	0	141	141.096	35	1	82	0	1	0	0	0	0	0	0	2	0	2	4	0	0	1	2	1	0	0	0	4.2	105	29.8	106	1.3	66.9	65.96	0	0
963	2333	0	2333	0	2333	0	0	141	141.352	39	2	55	0	1	0	0	0	0	0	0	3	0	2	4	0	0	1	2	1	0	0	0	5.6	114	21.7	122	0.9	74.2	60.56	0	0
964	1629	0	1629	0	1629	0	0	137	138.312	34	1	62	0	0	0	0	0	0	0	0	3	0	3	7	0	0	1	2	1	0	0	0	4.4	106	21.2	182	1.3	67.3	60.82	0	0
965	2373	0	2373	0	2373	0	0	140	140	47	1	65	1	0	0	0	0	0	0	0	3	0	3	3	0	0	1	2	1	0	0	0	4.7	114	20.9	100	0.9	96.3	59.81	0	0
966	2355	0	2355	0	2355	0	0	141	141.336	36	1	68	0	1	0	0	0	0	0	0	3	0	2	3	0	0	0	2	1	0	0	0	4.1	104	27.1	121	1.5	56.4	68.87	0	0
967	2292	0	2292	0	2063	1	0	142	141.952	31	1	74	1	1	0	0	0	0	0	0	3	0	1	3	0	0	1	1	1	0	0	0	3.9	103	26.1	97	1.1	83.1	67.37	0	0
968	2361	0	2361	0	10	1	0	143	142.632	30	2	40	1	0	0	0	0	0	0	0	4	0	1	3	0	0	0	2	1	0	0	0	3.6	106	23.2	77	2.7	22	71.43	0
969	2327	0	2327	0	18	1	0	143	142.84	24	2	62	0	1	0	0	0	0	0	0	4	0	1	3	0	0	1	2	1	0	0	0	3.4	111	23.7	90	1.4	49.2	59.78	0	0
970	2304	0	2304	0	2304	0	0	140	139.856	48	2	61	0	1	0	0	0	0	0	0	3	0	2	6	0	0	0	1	1	0	0	0	4.9	104	26.7	91	0.9	71.1	62.77	0	0
971	2310	0	2310	0	2310	0	0	140	139.92	35	1	92	0	1	0	0	0	0	0	0	4	0	1	3	0	0	1	1	1	0	0	0	4.6	106	22.5	95	0.6	163.2		0	0
972	2318	0	2318	0	2318	0	0	139	139.064	41	2	43	0	0	0	0	0	0	0	0	3	0	2	5	0	0	1	1	1	0	0	0	3.9	106	26.5	104	1.9	31	62.89	0
973	2359	0	2359	0	2359	0	0	143	142.888	43	1	71	1	1	0	0	0	0	1	0	3	0	2	4	0	0	1	2	1	0	0	0	4	107	25.7	93	1.1	77.8	66	0	0
974	2337	0	2337	0	2337	0	0	143	142.936	34	2	50	1	1	0	0	0	0	0	0	4	0	3	4	0	0	1	2	0	0	1	0	4	106	27.4	96	0.7	102	52.75	0	0
975	2342	0	2342	0	2342	0	0	141	140.888	38	1		1	1	0	0	0	0	0	0	4	0	4	7	0	0	1	1	0	0	0	0	4.1	107	28.1	93	1.6	51.8	60.26	0	0
976	2341	0	2341	0	62	1	0	135	136.152	51	1	65	1	1	0	0	0	0	0	0	4	0	2	3	0	0	1	1	0	0	0	0	4.6	108	22.5	172	1.3	62	52.31	0	0
977	2598	0	2598	0	2598	0	0	139	139.096	44	2	67	0	1	0	0	0	0	0	0	4	0	4	7	0	0	1	2	0	0	0	0	4.1	103	26.3	106	0.8	83	64.52	0	0
978	2307	0	2307	0	2307	0	0	140	140.8	46	1		0	1	1	0	0	0	0	0	4	0	4	7	0	0	1	2	0	0	0	0	5.3	101	30.2	150	1.2	69.4	62.67	0	0
979	2490	0	2490	0	2490	0	0	143	143.144	30	1	53	1	1	0	0	0	0	0	0	4	0	3	0	0	0	1	1	0	0	0	0	4.4	105	23.5	109	1.4	63.3	60.14	0
980	2610	0	2610	0	2610	0	0	142	141.68	37	2		0	1	1	0	0	0	0	0	4	0	4	7	0	0	1	1	0	0	0	0	3.5	101	34.4	80			58.87	1	0
981	2319	0	2319	0	2319	0	0	145	144.712	40	1	73	1	1	0	0	0	0	0	0	2	0	4	7	0	0	0	2	0	0	0	0	3.8	109	24.1	82	1.2	71.4	52.66	0	0
982	637	0	637	0	637	0	0	142	143.84	43	1	61	0	1	1	0	0	0	0	0	1	0	2	3	0	0	1	2	0	0	0	0	5.5	110	24.8	215	1.1	77.8	54.17	0	0
983	2213	0	2213	0	2213	0	0	132	138.256	50	1		1	1	1	0	0	0	0	0	4	0	4	7	0	0	1	2	0	0	0	0	5.1	98	24.8	491	1	84.2	57.69	0	0
984	2233	0	2233	0	2233	0	0	142	141.904	44	1		1	1	0	0	0	0	0	0	4	0	4	7	0	0	0	1	0	0	0	0	4.4	108	25.3	94	1.7	46.8	59.09	0	0
985	2263	0	2263	0	#NULL!	1	0	142	142.016	33	1		0	1	0	0	0	0	0	0	4	0	4	7	0	0	1	2	0	0	0	0	4.2	106	27.7	101	1.4	62.1	54.9	0	0
986	2270	0	2270	0	2211	1	0	138	137.872	44	1	65	0	1	0	0	0	0	0	0	3	0	3	3	0	0	1	1	0	0	0	0	4.8	107	22.3	92	0.9	97.6	52.34	1	0
987	2306	0	2306	0	1774	1	0	142	142.192	28	1	73	1	1	0	0	0	0	0	0	4	0	1	2	0	0	1	1	0	0	0	0	4.2	107	23.7	112	1.2	76.7	56.82	0	0
988	2228	0	2228	0	1487	1	0	142	141.728	42	1		0	1	0	0	0	0	0	0	4	0	4	7	0	0	1	1	0	0	0	0	4.7	109	25.5	83	0.9	98.5	51.61	0	0
989	2267	0	2267	0	229	1	0	140	139.904	51	1		0	1	0	0	0	1	0	0	4	0	4	7	0	0	1	2	0	0	0	0	4.2	104	26.7	94	1.2	68	65.66	0	0
990	197	1	197	0	73	1	0	138	137.12	57	1	59	0	1	0	0	0	0	1	0	4	0	3	4	0	0	1	1	0	0	0	0	4.8	111	21.9	45	1.1	73.5	64.86	0	1
991	2205	0	2205	0	2205	0	0	142	141.968	25	1	72	0	1	0	0	0	0	0	0	3	0	1	5	0	0	1	1	0	0	0	0	4.2	110	20.2	98	1.1	86.8	62.2	0	0
992	2243	0	2243	0	2243	0	0	141	144.328	60	1	70	1	1	0	0	0	0	0	0	1	0	1	4	0	0	1	1	0	0	0	0	4.4	106	27	308	0.7	122.5	57.74	1	0
993	2250	0	2250	0	2250	0	0	140	139.808	40	2	50	0	1	1	0	0	0	0	0	4	0	3	6	0	0	1	1	0	0	0	0	4.4	108	23.8	88	1	65.4	60.87	1	0
994	2222	0	2222	0	2222	0	0	142	141.872	50	2	74	0	1	1	0	0	0	0	0	1	0	1	4	0	0	0	1	0	0	0	0	3.7	107	25.1	92	1.1	56	62.63	1	0
995	605	1	605	0	605	0	0	139	138.888	52	2	52	0	1	0	0	0	1	1	0	3	0	3	1	0	0	1	1	0	0	0	0	3.8	109	20.4	93	0.9	70	69.37	0	0
996	2223	0	2223	0	319	1	0	138	137.76	27	1	56	0	1	0	0	0	0	0	0	4	0	3	5	0	0	1	2	0	0	0	0	4.1	103	25.2	85	1.1	85.5	58.27	0	0
997	2232	0	2232	0	2232	0	0	137	137.912	49	1	76	1	1	0	0	0	0	0	0	3	0	1	3	0	0	1	1	0	0	0	0	3.7	108	22.8	157	1.6	49.2	67.9	0	0
998	2269	0	2269	0	#NULL!	1	0	140	139.872	41	1	56	0	1	0	0	0	0	0	0	3	1	2	5	0	0	1	1	0	0	0	0	4.9	101	26.5	92			61.26	0	0
999	2463	0	1980	1	1470	1	0	138	139.136	43	1	43	0	1	0	0	0	0	0	1	4	1	3	5	0	0	1	1	0	0	0	0	3.6	111	23.1	171				0
1000	2547	0	2547	0	2547	0	0	143	143.016	51	2	51	0	1	0	0	0	0	0	0	3	0	1	3	0	0	1	2	0	0	0	0	4.6	107	25.4	101	0.9	70.3	56.67	0	0
1001	1908	0	450	1	279	1	0	141	140.952	37	2	60	0	0	1	0	0	0	0	0	1	0	3	4	0	0	1	1	0	0	0	0	5.3	117	17.8	97			63.48	0
1002	2227	0	2227	0	2227	0	0	136	137.072	53	1	61	0	1	0	0	0	0	0	0	3	0	1	3	0	0	0	1	0	0	0	0	3.5	105	19.7	167	1	83.2	66.67	0	0
1003	2181	0	2181	0	2181	0	0	139	139.128	30	2	40	0	0	0	0	0	0	0	0	3	0	1	5	0	0	1	1	0	0	0	0	4.1	109	19.8	108	0.8	89.7	57.83	0
1004	2224	0	2224	0	2224	0	0	141	140.84	38	2	58	0	1	0	0	0	0	0	0	4	0	1	4	0	0	1	1	0	0	0	0	4.2	107	23.7	90	0.6	119.1		0	0
1005	2215	0	2215	0	2215	0	0	137	137.736	53	2	59	0	0	0	0	0	0	0	0	4	0	1	2	0	0	1	1	0	0	0	0	4.4	104	23.3	146	0.7	93.2	64.38	0	0
1006	347	1	347	0	#NULL!	1	0	135	135.896	44	1	58	0	1	1	0	0	0	0	0	1	0	2	4	0	0	0	2	0	0	0	0	4.6	107	18.7	156	3.8	18.5	44.19	0	1
1007	895	0	895	0	21	1	0	138	138.08	57	2	60	0	1	1	0	0	0	0	0	1	0	1	2	0	0	1	2	0	0	0	0	5.1	109	25.4	105	1.4	41.3	56.7	0	0
1008	2248	0	2248	0	70	1	0	142	142	43	1	63	0	1	0	0	0	0	1	0	3	0	1	4	0	0	1	2	0	0	0	0	4.3	106	24.8	100	1.1	77.8	56.67	0	0
1009	2208	0	2208	0	2208	0	0	140	139.824	45	1	61	1	1	0	0	0	0	0	0	3	0	1	3	0	0	1	1	0	0	0	0	4.2	106	23.2	89	1	86		1	0
1010	2214	0	2214	0	2214	0	0	136	136.16	50	1	67	0	1	0	0	0	0	0	0	4	0	2	4	0	0	1	2	0	0	0	0	5.4	113	16	110	1.3	62.2	50.74	0	0
1011	2201	0	2201	0	2201	0	0	140	139.856	37	1	64	0	1	0	0	0	1	0	0	3	0	1	3	0	0	1	1	0	0	0	0	4.4	106	26	91	1.2	72.5	60.56	0	0
1012	2187	0	2187	0	2187	0	0	145	144.92	22	1	72	0	1	0	0	0	0	0	0	3	0	1	3	0	0	0	1	0	0	0	0	4.1	109	26.5	95	1	99.5	56.67	0	0
1013	2236	0	2236	0	#NULL!	1	0	140	139.856	30	2	39	0	1	0	0	0	0	0	0	3	0	1	1	0	0	1	2	0	0	0	0	4.6	106	24.8	91	0.8	89.7	65.22	0	0
1014	2475	0	2475	0	30	1	0	140	139.584	51	2	63	0	0	0	0	0	0	0	0	4	1	3	3	0	0	1	1	0	0	0	0	4.2	118	14.5	74			50	0	0
1015	342	0	342	0	12	1	0	144	143.984	35	1	73	0	1	0	0	0	0	0	0	3	0	1	4	0	0	1	2	0	0	0	0	3.7	108	22.1	99	1.3	66.9	60.53	0	0
1016	2221	0	2221	0	2221	0	0	142	142.096	38	1	58	1	1	1	1	0	0	0	0	3	0	1	3	0	0	1	1	0	0	0	0	4.1	105	30.2	106	1.1	79.8	61.4	0	0
1017	2209	0	2209	0	2209	0	0	137	136.968	53	1	60	0	1	0	0	0	0	0	0	1	0	2	4	0	0	0	2	0	0	0	0	4.4	99	31.1	98	1.9	39.7	50	0	0
1018	2187	0	2187	0	2187	0	0	138	138.08	56	1	69	1	1	0	0	0	0	0	0	3	0	2	5	0	0	1	2	0	0	0	0	4.8	107	21.1	105	1.4	55.8	62.21	0	0
1019	2100	0	1650	1	355	1	0	138	137.92	62	1	69	0	1	1	0	0	0	0	0	1	0	2	5	0	0	1	2	0	0	0	0	6	111	18.3	95	2.3	30.8	60.17	0	0
1020	231	1	231	0	231	0	0	138	138.704	47	1	60	0	1	1	0	0	0	1	0	1	0	3	0	0	0	1	1	0	0	0	0	5.1	106	21.4	144	1.3	63	60.56	0
1021	2190	0	2190	0	#NULL!	1	0	140	140.112	22	2	53	0	1	1	0	0	0	0	0	2	0	1	0	0	0	1	2	0	0	0	0	5	108	26.4	107	0.7	111.4	68.13	1	0
1022	2175	0	2175	0	#NULL!	1	0	141	143.928	42	2	52	0	1	0	0	0	1	0	0	1	0	2	4	0	0	0	1	0	0	0	0	4.9	106	26.8	283	0.8	83.7	65.15	0	0
1023	2186	0	2186	0	76	1	0	139	139.048	38	1	74	1	1	0	0	0	0	0	0	3	0	1	3	0	0	0	2	0	0	0	0	4.7	109	21.8	103	1.3	65.8	56.76	0	0
1024	2189	0	2189	0	2189	0	0	139	139.064	34	1	60	1	1	0	0	0	0	0	0	4	0	3	3	0	0	1	2	0	0	0	0	4.1	109	19.7	104	1.7	49.4	57.29		0
1025	2222	0	2222	0	2222	0	0	140	140.032	34	1	62	0	1	0	0	0	0	0	0	2	0	2	3	0	0	1	2	0	0	0	0	4.6	110	22.8	102	1.7	49.4		1	0
1026	2166	0	2166	0	#NULL!	1	1	134	134.48	38	1	71	0	0	0	0	0	0	0	0	4	0	3	5	0	0	1	2	0	0	0	0	5.3	109	16.5	130	1.4	60.4	61.32	0
1027	2132	0	2132	0	2132	0	0	144	143.84	55	2	48	0	1	0	0	0	0	1	0	3	0	1	2	0	0	1	2	0	0	0	0	3.6	107	26	90	0.7	92.5	54.84	0	0
1028	2157	0	2157	0	2157	0	0	142	142.048	48	1	59	1	1	0	0	0	0	0	0	3	0	1	0	0	0	1	1	0	0	0	0	4.3	109	23.4	103	1.4	57.6		0	0
1029	2139	0	2139	0	2139	0	0	138	138.128	41	2	56	0	1	0	0	0	0	0	0	3	0	1	3	0	0	1	2	0	0	0	0	5	108	23.3	108	1	65	59.84	0
1030	2153	0	2153	0	16	1	0	141	140.968	35	1	67	0	1	0	0	0	0	0	0	3	0	3	4	0	0	1	2	0	0	0	0	4	105	28.2	98	1.1	81.1	63.75	0
1031	2046	0	2046	0	15	1	0	140	141.216	41	1	71	1	1	0	0	0	0	0	0	3	0	1	2	0	0	1	2	0	0	0	0	3.9	108	21.6	176	1.2	71	58.6	0	0
1032	2171	0	2171	0	#NULL!	1	1	133	133.112	39	1	71	0	1	0	0	0	0	0	0	1	0	3	2	0	0	1	1	0	0	0	0	6.1	107	19.5	107			60.63	0	0
1033	2187	0	2187	0	11	1	0	142	141.936	28	1	78.5	0	1	0	0	0	0	0	0	2	0	2	4	0	0	0	2	0	0	0	0	3.7	104	29.4	96	1.4	64.2		0	0
1034	2170	0	2170	0	2170	0	0	142	142.256	27	2	55	0	1	0	0	0	0	0	0	2	0	1	2	0	0	1	1	0	0	0	0	3.7	102	27.6	116	0.8	91.6	62.71	0	0
1035	2181	0	2181	0	2181	0	0	141	141.16	51	1	66	0	1	0	0	0	0	0	0	3	0	1	3	0	0	0	2	0	0	0	0	3.8	107	23.9	110	1.2	68	42.18	0	0
1036	2181	0	2181	0	2181	0	0	139	139.176	39	2	80	0	1	0	1	0	0	0	0	3	0	1	2	0	0	0	1	0	0	0	0	4.1	106	23.8	111	1.1	58.9	61.39	1	0
1037	2121	0	2121	0	113	1	0	143	143.432	28	1	60	1	1	0	0	0	0	0	0	3	0	3	3	0	0	0	2	0	0	0	0	4.7	111	21.5	127	1.2	76.7	62.2	1
1038	1618	0	1618	0	578	1	1	134	133.984	32	1	58	0	1	0	0	0	0	0	0	2	0	3	3	0	0	1	1	0	0	1	0	4.6	105	20.9	99	1.2	74.7	61.61	0
1039	2160	0	2160	0	2160	0	0	141	140.936	52	2	51	0	1	0	0	0	1	0	0	3	0	2	4	0	0	1	1	0	0	0	0	4.4	114	16.9	96	0.9	70	51.82	0	0
1040	2160	0	2160	0	#NULL!	1	0	140	140.24	36	1	61	0	1	0	0	0	0	0	0	2	0	1	0	0	0	0	1	0	0	0	0	4.6	108	25.4	115	1.4	61	60.78	0	0
1041	2164	0	2164	0	53	1	0	139	138.968	46	2	60	0	1	0	0	0	0	0	0	3	0	1	1	0	0	0	2	0	0	0	0	4.2	109	24	98	1.5	39.8	66.67	0
1042	2157	0	2157	0	2157	0	0	139	138.92	52	2	55	0	1	0	0	0	0	0	0	3	0	1	4	0	0	1	2	0	0	0	0	4.3	103	28	95	0.9	70		0	0
1043	2109	0	2109	0	2109	0	0	142	144.928	39	1	83.7	0	1	1	0	0	0	0	1	1	0	3	5	0	0	1	2	0	0	0	0	4.5	105	27	283	1.2	71.8	59.56	0	0
1044	2163	0	2163	0	154	1	0	142	141.92	33	1	47.5	1	1	1	1	0	0	0	0	4	0	1	3	0	0	1	2	0	0	0	0	4.3	105	27.2	95	1.4	62.1	66.28	0	0
1045	2105	0	2105	0	15	1	0	134	136.096	56	1	66	0	0	0	0	0	0	1	0	1	0	1	3	0	0	1	1	0	0	0	0	4.8	100	25.5	231	1.2	66.7	60.22	1	0
1046	2155	0	2155	0	2155	0	0	143	144.12	46	1	87	1	0	0	0	0	0	0	0	3	0	3	4	0	0	0	1	0	0	0	0	3.9	106	26.3	170			13.55	1	0
1047	2149	0	2149	0	#NULL!	1	0	142	141.952	27	1	64	1	1	0	0	0	0	0	0	2	0	1	0	0	0	0	2	0	0	0	0	5.7	106	26.4	97	1.5	59.8	70.06	0	0
1048	2083	0	2083	0	16	1	0	138	138.496	40	1	62	1	1	0	0	0	0	0	0	3	0	2	4	0	0	1	2	0	0	0	0	3.8	103	22.7	131	1.1	78.9	62.83	0	0
1049	2136	0	2136	0	40	1	0	145	144.984	41	2	68	0	1	0	0	0	0	0	0	3	0	3	3	0	0	0	2	0	0	0	0	4.9	109	26.5	99	0.8	84.2	59.5	1	0
1050	2164	0	2164	0	20	1	0	140	139.76	62	2	50	0	1	0	0	0	0	0	0	3	0	3	5	0	0	1	2	0	0	0	0	5.9	111	19.6	85	1.4	40.6	61.9	0	0
1051	2116	0	2116	0	2116	0	0	140	140.768	48	2	48	0	1	0	0	0	0	0	0	3	0	3	4	0	0	1	2	0	0	0	0	4.2	101	27.9	148	1.5	39.5	67.16	0	0
1052	1867	0	1867	0	1732	1	0	143	142.68	36	2	49	0	1	0	0	0	0	0	0	3	0	3	4	0	0	1	2	0	0	0	0	5.1	109	28.8	80	0.9	75.4	62.89		0
1053	2162	0	2162	0	152	1	0	138	138	45	1	59	0	1	0	0	0	0	0	0	3	0	1	4	0	0	1	1	0	0	0	0	3.9	104	24.5	100	1.2	69.7	56.91	0	0
1054	1802	0	1802	0	1802	0	0	139	138.856	46	1	68	1	1	0	0	0	0	1	0	2	0	2	5	0	0	1	2	0	0	0	0	4.3	110	20.1	91	0.8	110.8	59.6	0	0
1055	2143	0	2143	0	2143	0	0	139	139.384	43	2	51	0	1	1	0	0	0	0	0	1	0	2	5	0	0	1	2	0	0	0	0	4.6	106	25	124	0.7	97.2	66.04	1	0
1056	2424	0	2424	0	2424	0	0	143	142.984	45	1	66	1	1	0	0	0	0	1	0	3	0	2	5	0	0	0	1	0	0	0	0	5	112	20.4	99			63.08	0	0
1057	2089	0	2089	0	2089	0	0	143	143.16	57	2	65	0	0	0	0	0	0	0	0	4	0	2	4	0	0	1	2	0	0	0	0	4.1	110	23.5	110	0.8	78.7	57.89	0	0
1058	2118	0	2118	0	759	1	0	141	141.24	49	1	59	1	1	0	1	0	0	0	0	3	0	2	5	0	0	1	2	0	0	0	0	4.2	107	24.8	115	1.5	53	57.69	0	0
1059	2084	0	2084	0	2084	0	0	139	138.984	64	1	71	0	1	0	0	0	0	0	0	1	0	2	5	0	0	1	2	0	0	0	0	5.3	105	24.1	99	3	22.5		0	0
1060	2135	0	2135	0	2135	0	0	140	140.224	25	2	44	0	1	0	0	0	0	0	0	3	0	2	5	0	0	1	1	0	0	0	0	3.8	100	30.3	114	0.8	93	62.82	0	0
1061	2121	0	2121	0	113	1	0	138	139.6	50	1	76	1	1	1	0	0	0	0	0	1	0	2	3	0	0	1	1	0	0	0	0	5.4	107	20.3	200	1	84.2	62.73	0	0
1062	2415	0	2415	0	2415	0	0	138	137.904	48	1	57	1	1	0	0	0	0	0	0	4	0	1	3	0	0	1	1	0	0	0	0	5.7	106	23.8	94			58.45	0	0
1063	2042	0	2042	0	2042	0	0	141	141.496	51	2	54.5	0	1	1	0	0	0	0	0	3	0	2	6	0	0	1	1	0	0	0	0	4.2	105	26.3	131	1.1	55.7	63.89	0	0
1064	2046	0	2046	0	2046	0	0	139	139.128	60	1	73	1	1	0	0	0	0	0	0	1	0	1	3	0	0	0	2	0	0	0	0	4.5	108	22.9	108	0.9	91.6	64.91	0	0
1065	2054	0	2054	0	84	1	0	140	139.952	22	1	65	0	1	0	0	0	0	0	0	2	0	1	4	0	0	0	1	0	0	0	0	4.1	108	24.5	97	1.5	62.3	57.55	0	0
1066	2091	0	2091	0	2091	0	0	143	142.92	60	1	65.9	1	1	1	0	0	0	0	0	1	0	1	2	0	0	0	1	0	0	0	0	3.8	108	23.4	95	0.9	91.6	53.15	0	0
1067	2049	0	2049	0	2049	0	0	138	138.256	25	2	47	0	1	0	0	0	1	0	0	3	0	1	6	0	0	1	2	0	0	0	0	4.2	105	23.2	116	0.4	207	58.18	0	0
1068	2325	0	2325	0	2325	0	0	140	140.208	37	1	71	0	1	1	0	0	0	0	0	1	0	3	3	0	0	1	1	0	0	0	0	6.4	111	21.2	113			66.36	0	0
1069	2097	0	2097	0	2097	0	0	141	141.144	52	1	69	0	0	0	0	0	0	0	0	1	0	1	2	0	0	1	1	0	0	0	0	4.5	104	24.6	109	1.2	67.7	66.67	0	0
1070	2090	0	2090	0	2090	0	0	140	140.32	39	1	80	0	1	1	0	0	0	0	0	3	0	1	0	0	0	0	1	0	0	0	0	4.2	105	24	120	1.1	79.3	68.25	0
1071	2078	0	2078	0	2078	0	0	141	141.144	39	1	60	1	1	0	0	0	0	1	0	3	0	2	5	0	0	0	2	0	0	0	0	4.2	107	23.1	109	1.2	71.8	63.43	0	0
1072	2391	0	2391	0	153	1	0	143	143.192	41	1	63	1	1	1	0	0	0	0	0	3	0	1	3	0	0	0	1	0	0	0	0	4.2	108	22.6	112	0.9	99	63.16	1	0
1073	2096	0	2096	0	2096	0	0	142	141.776	63	2	50	0	0	0	0	0	0	0	0	4	0	2	4	0	0	1	2	0	0	0	0	3.7	108	25.9	86	1.2	48.3	65.67	0
1074	667	1	480	1	369	1	0	141	140.76	54	2	35	0	1	0	0	0	0	0	0	2	0	1	3	0	0	1	1	0	0	0	0	4.8	104	23.3	85	0.7	92.8	69.33	0	0
1075	2076	0	2076	0	2076	0	0	142	141.936	24	2	64	0	1	0	0	0	0	0	0	3	0	3	0	0	0	1	2	0	0	0	0	4.5	109	24.5	96	1.1	65		1	0
1076	613	0	613	0	1935	1	0	140	139.888	32	2	45	0	1	0	1	0	0	0	0	4	0	2	3	0	0	1	1	0	0	0	0	4.2	112	21	93	1.3	50.5	58	1
1077	108	1	2091	0	2091	0	0	140	140	51	1	57	0	0	0	0	0	0	0	0	3	0	2	6	0	0	1	1	0	0	0	0	4.3	108	22	100	1.7	45.5	55.74	0
1078	1989	0	1989	0	284	1	0	139	138.968	31	1	63	0	1	0	0	0	0	0	0	3	0	1	5	0	0	1	1	0	0	0	0	4.7	105	25.6	98	1.1	83.1	59.83	0	0
1079	2002	0	2002	0	2002	0	0	140	141.552	53	1	65	0	1	0	0	0	0	0	0	3	0	1	4	0	0	1	1	0	0	0	0	3.8	104	23.4	197	1	83.2	60	0
1080	2051	0	2051	0	2051	0	0	144	143.584	53	1	68.9	1	1	0	0	0	0	0	0	3	0	2	3	0	0	1	1	0	0	0	0	3.8	108	23	74	1.5	52.1	67.65	1
1081	2048	0	2048	0	2048	0	0	142	141.936	42	1	54	0	1	1	0	0	0	0	0	3	0	1	6	0	0	1	2	0	0	0	0	3.8	107	25.4	96	1	87.2	60.64	0	0
1082	2077	0	2077	0	2077	0	0	142	141.84	33	2	50	0	1	0	0	0	0	0	0	2	0	1	1	0	0	1	2	0	0	0	0	4	109	24.9	90	0.8	87.9		1	0
1083	480	0	480	0	480	0	0	139	139.592	52	1	63	1	1	1	0	0	0	0	0	1	0	2	4	0	0	1	1	0	0	0	0	5.5	113	19.5	137			70.24	0	0
1084	2002	0	2002	0	2002	0	0	138	138.416	52	1	66	1	1	1	1	0	0	0	0	1	0	1	3	0	0	1	2	0	0	0	0	4.7	103	24.2	126	0.8	108.1	59.22	0	0
1085	225	1	225	0	225	0	0	140	139.504	43	2	50	0	1	0	0	0	0	0	0	3	0	1	2	0	0	1	2	0	0	0	0	5.4	112	20.7	69	1.6	37.5	57.8	0
1086	2003	0	2003	0	2003	0	0	141	140.952	41	2	51	0	1	0	0	0	0	0	0	3	0	2	4	0	0	1	2	0	0	0	0	5.4	113	18.8	97	0.8	84.2	62.73	0	0
1087	2307	0	2307	0	2307	0	0	139	139.864	46	1	76	1	1	1	0	0	0	0	0	1	0	2	4	0	0	1	1	0	0	0	0	4.2	106	22	154	1.7	46.4	57.03	1	0
1088	1966	0	1966	0	1966	0	0	138	137.808	45	2	57	0	1	0	0	0	0	0	0	3	0	3	5	0	0	1	2	0	0	0	0	4.6	108	20.4	88	1.2	51.7	60.24	0	0
1089	1924	0	1924	0	1924	0	0	139	138.936	27	2	57	0	1	0	0	0	0	0	0	3	0	1	3	0	0	1	2	0	0	0	0	4	108	23.2	96	0.7	106.9	63.16	1	0
1090	1915	0	1915	0	1915	0	0	142	141.504	56	1	69	0	1	1	0	0	0	0	0	1	0	1	2	0	0	1	2	0	0	0	0	5.2	106	27.9	69	1.1	73.7	55.2	0	0
1091	1984	0	1984	0	1984	0	1	128	129.28	46	2	53	0	1	1	1	0	1	0	0	1	0	2	5	0	0	1	2	0	0	0	0	5	95	26	180	1	63.5	56.78	0	0
1092	1985	0	1985	0	1985	0	1	133	134.232	53	2	60	0	1	1	0	0	0	0	0	1	0	1	3	0	0	1	2	0	0	0	0	4.1	103	23.1	177	0.9	69.7		1	0
1093	1913	0	1913	0	1913	0	0	143	142.92	46	1	68	1	0	0	0	0	0	0	0	3	0	2	4	0	0	1	2	1	0	0	0	4.3	107	27.7	95	1.9	40.8	61.11	1	0
1094	1961	0	1961	0	10	1	0	144	144.144	25	1	78	0	1	0	0	0	0	0	0	4	0	4	4	0	0	1	1	0	0	0	0	4.5	110	23.7	109	1	96.9	58.77		0
1095	1950	0	1950	0	1950	0	0	143	143.784	49	1	61	0	1	1	0	0	0	0	0	1	0	1	3	0	0	1	1	0	0	0	0	4.8	106	26.1	149	1.4	57.3	65.47	0	0
1096	1957	0	1957	0	1114	1	0	139	139.048	54	1	65	1	1	0	0	0	0	0	0	2	0	3	3	0	0	1	2	0	0	0	0	5.6	111	22.7	103	0.8	107.2	55.56	0	0
1097	1950	0	1950	0	1950	0	0	140	140.512	47	2	38	0	1	0	0	0	0	0	0	4	0	3	5	0	0	1	2	0	0	0	0	4.4	107	25.2	132	1.5	39.6	54.17	0	0
1098	1955	0	1955	0	1955	0	0	137	138.872	33	2	48	0	1	0	0	0	0	0	0	2	0	3	5	0	0	1	2	0	0	0	0	4.4	109	22.5	217	0.9	76.8	52.33	0
1099	1919	0	1919	0	1919	0	0	140	139.872	27	2	51	0	1	0	0	0	0	0	0	2	0	1	3	0	0	1	2	0	0	0	0	4.3	107	23.2	92	1.7	38.4	63.72	0	0
1100	1901	0	1901	0	1901	0	0	140	139.808	48	2	48.5	0	1	0	0	0	0	0	0	2	0	3	6	0	0	1	2	0	0	0	0	4.3	113	21.1	88	1	63	56.1	0	0
1101	2229	0	2229	0	2229	0	0	140	139.872	32	2	55	0	1	1	0	0	0	0	0	1	0	3	5	0	0	1	1	0	0	0	0	4.5	108	22.4	92			67.76		0
1102	1972	0	270	1	8	1	0	142	141.728	55	1	85	0	1	1	0	0	0	0	0	1	0	2	4	0	0	1	2	0	0	0	0	4.9	115	21.8	83	1.8	41.9	61.11	0	0
1103	1958	0	1958	0	1958	0	0	141	141.256	47	2	55.7	0	1	1	0	0	0	0	0	4	0	4	2	0	0	0	1	0	0	1	0	5.9	109	26.6	116			65.93	0	0
1104	738	0	738	0	738	0	0	140	142.704	39	1	63	1	1	1	0	0	0	0	0	3	0	2	3	0	0	1	1	0	0	0	0	4.6	106	25.4	269	1.4	60.1	63.96	0	0
1105	1947	0	1947	0	#NULL!	1	0	144	143.872	49	2	55	0	1	0	0	0	0	0	0	4	0	1	3	0	0	1	1	1	0	0	0	3.8	110	25.6	92	0.6	113.1	51.09	0	0
1106	1933	0	1933	0	1048	1	0	144	144	25	1	74	1	1	0	0	0	0	0	0	3	0	1	3	0	0	1	1	0	0	0	0	4.3	110	24	100	1.5	60.7	66.67	0
1107	1909	0	1909	0	1909	0	0	141	140.968	40	2	59	0	1	0	0	0	0	0	0	2	0	3	4	0	0	1	2	0	0	0	0	4.9	104	27.7	98	1.8	33.2	65.14	0	0
1108	1861	0	1861	0	1861	0	0	140	140	34	1	79	0	0	0	0	0	0	0	0	2	0	3	5	0	0	1	2	0	0	0	0	4.3	111	21.6	100	1.1	81.6
1109	1954	0	1954	0	1954	0	0	139	139.016	31	1	56	1	1	0	0	0	0	0	0	2	0	1	3	0	0	1	1	0	0	0	0	4.5	103	24.7	101	0.9	104.8	67.86	1	0
1110	1814	0	1814	0	1814	0	0	140	140.096	41	1	58	1	1	0	0	0	1	0	0	4	0	3	0	0	0	1	1	0	0	0	0	4.5	108	24.3	106	1.9	41.8	58.04	0	0
1111	1912	0	1912	0	1912	0	0	139	138.632	56	2	53	0	1	0	0	0	0	0	0	2	0	1	2	0	0	1	1	1	0	0	0	4.3	106	24.1	77	0.7	92.1	68.24	0	0
1112	2229	0	2229	0	2229	0	0	139	139.864	47	1	74	0	1	1	0	0	0	0	0	1	1	3	4	0	0	1	1	0	0	0	0	4.5	108	21	154			44.13	0	0
1113	297	1	297	0	297	0	0	142	142.192	28	1	76	1	1	0	0	0	0	0	0	3	0	1	3	0	0	1	1	0	0	0	0	4.9	113	20.1	112	1.6	55.1	38.25	0
1114	1861	0	1861	0	#NULL!	1	0	141	141.032	40	1	80	1	1	0	0	0	0	0	0	2	0	1	0	0	0	0	1	0	0	0	0	4	104	23.3	102	1.4	59.8	59.88	0	0
1115	1919	0	1919	0	1919	0	0	140	140.08	27	2	42	0	1	0	0	0	0	0	0	2	0	1	0	0	0	0	1	0	0	0	0	3.5	103	24.2	105	0.8	91.6	54.55	1
1116	1940	0	1940	0	1525	1	0	140	140.112	34	2	52	0	1	0	0	0	0	0	0	3	0	3	3	0	0	1	2	0	0	0	0	4.2	108	22.9	107	1.3	49.9		0	0
1117	1910	0	1910	0	1910	0	0	141	140.792	55	2	59	0	1	0	0	0	1	0	0	2	0	1	3	0	0	1	1	0	0	0	0	4	105	23.5	87	0.7	92.5	50	0	0
1118	1840	0	1840	0	1840	0	0	138	138.48	49	1	77	1	1	0	0	0	0	0	0	1	0	1	3	0	0	1	1	0	0	0	0	5	109	25.3	130	1.3	62.5		0
1119	1909	0	1909	0	1909	0	0	143	142.952	49	1	64	1	1	1	0	0	0	0	0	2	0	1	4	0	0	1	2	0	0	0	0	3.9	105	27.1	97	1	84.5	44	0	0
1120	1922	0	1922	0	1922	0	0	136	135.728	46	2	53	0	1	0	0	0	0	0	0	3	0	3	5	0	0	1	1	0	0	0	0	5.3	114	21	83	1.1	56.9	68.29
1121	417	0	417	0	417	0	0	144	143.68	32	1	75	0	0	0	0	0	0	0	0	1	0	2	4	0	0	1	2	0	0	0	0	3.9	105	26.9	80	0.7	139.1	59.55	0
1122	1856	0	1856	0	1856	0	0	142	142.048	55	2	58	0	1	1	0	0	1	0	0	3	0	3	3	0	0	1	2	0	0	0	0	3.9	110	25.1	103	1	61.3	56.18	0	0
1123	1934	0	1934	0	1934	0	0	138	137.984	34	1	59	0	1	0	0	0	1	0	0	3	0	2	4	0	0	1	2	0	0	0	0	3.9	105	19.7	99	1.1	81.6	64.77	0	0
1124	1927	0	1927	0	1927	0	0	144	144.208	28	2	53	0	1	0	0	0	0	0	0	3	0	3	4	0	0	1	2	0	0	0	0	4.1	106	26	113	1.5	44	58.57	0
1125	249	0	249	0	249	0	0	139	138.76	50	2	57	0	1	0	0	0	0	0	0	3	0	3	5	0	0	1	1	0	0	0	0	4.6	108	23.5	85	1.6	36.3		0
1126	2154	0	2154	0	2154	0	0	140	140.096	47	2	52	0	1	1	0	0	0	0	0	1	0	2	3	0	0	1	1	0	0	0	0	5.7	110	21.9	106				0	0
1127	1871	0	1871	0	1871	0	0	139	138.824	29	2	47	0	1	0	0	0	0	0	0	3	0	3	4	0	0	1	2	0	0	0	0	4.5	110	19	89	1	69.8	64.29	0
1128	203	0	203	0	203	0	0	141	140.76	42	2	55	0	1	0	0	0	0	0	0	3	0	1	2	0	0	1	2	0	0	0	0	4.6	105	25.1	85	0.9	73.1	57.14	0	0
1129	1905	0	1905	0	1905	0	0	141	141.048	28	2	45	0	1	0	0	0	0	1	0	2	0	3	0	0	0	1	1	0	0	0	0	4.6	105	26.3	103	1.1	63	64.86	0	0
1130	1832	0	1832	0	1305	1	0	138	138.512	37	2	50	0	0	1	0	0	1	0	0	1	0	1	3	0	0	1	1	0	0	0	0	4.8	105	23.3	132	1.2	53.8	74.62	0
1131	1859	0	1859	0	1859	0	0	138	137.84	40	2	55	0	0	0	0	0	0	0	0	2	0	1	0	0	0	0	1	0	0	0	0	4.6	105	20.6	90	1.7	35.4	64.56	0	0
1132	1914	0	1914	0	1914	0	0	142	141.712	48	2	45	1	1	0	0	0	0	0	0	3	0	1	2	0	0	1	2	1	0	0	0	4.3	106	23	82	0.7	95.1	63.93	0	0
1133	1810	0	1810	0	1810	0	0	139	139.016	49	1	79	0	1	1	1	0	0	0	0	1	0	2	3	0	0	1	2	0	0	0	0	4.5	109	24.5	101	1.7	45.8	57.74	0	0
1134	1909	0	1909	0	1909	0	0	140	139.84	53	1	75	1	1	0	0	0	0	1	0	3	0	2	4	0	0	1	2	0	0	0	0	3.9	104	27.4	90	2	37.4	63.91	1	0
1135	1829	0	1829	0	115	1	0	142	141.712	50	1	70	1	0	0	0	0	0	0	0	4	0	1	3	0	0	1	2	0	0	0	0	4.6	107	23.2	82	1.3	62.2	66.94	0	0
1136	1867	0	1867	0	1867	0	0	138	137.984	23	1	73	0	1	0	0	0	0	0	0	2	0	1	0	0	0	1	1	0	0	0	0	4.4	106	22.1	99	1.1	88.3	58.08	0	0
1137	1881	0	1881	0	91	1	1	131	131.192	31	2	51	0	1	0	0	0	0	1	0	2	0	1	1	0	0	1	2	1	0	0	0	5	100	23	112	1.3	50.9	57.38	0
1138	1829	0	1829	0	1829	0	0	139	139.688	23	1	72	1	1	0	0	0	0	0	0	4	0	2	4	0	0	1	2	0	0	0	0	4.7	108	21.5	143	1.9	47	71.17	0	0
1139	1833	0	1833	0	1833	0	0	137	137.64	52	1	71	0	1	0	0	0	0	0	0	2	0	1	3	0	0	1	1	0	0	0	0	4.5	105	21.4	140	0.9	94.3	66.67	0	0
1140	1894	0	1894	0	1894	0	0	140	140.592	63	1	74	0	1	1	0	0	1	0	0	1	0	1	3	0	0	1	1	0	0	0	0	4.3	106	22.5	137	1.5	50.3	57.33	0	0
1141	1896	0	1896	0	539	1	0	142	141.872	46	2	42	0	1	0	0	0	0	0	0	3	0	2	3	0	0	1	2	0	0	0	0	4.7	115	17.3	92	0.9	71.8	55	0	0
1142	1875	0	1875	0	1875	0	0	143	143.592	24	1	60	0	1	0	0	0	0	0	0	3	0	3	6	0	0	1	2	0	0	0	0	4.5	104	30.7	137	0.6	176.2	57.14	0	0
1143	1818	0	1818	0	1818	0	0	143	142.36	39	2	58	0	1	0	0	0	0	0	0	1	0	3	3	0	0	1	2	0	0	0	0	3.5	108	25.6	60	0.8	85	61.24	0	0
1144	1727	0	1727	0	1727	0	0	143	143	51	2	54	0	1	0	0	0	0	0	0	3	0	1	2	0	0	1	1	1	0	0	0	3.4	106	24	100	0.7	93.9	67.78	1	0
1145	1869	0	1869	0	1869	0	0	143	143.64	44	1	72	0	1	0	0	0	0	0	0	4	0	3	4	0	0	1	2	0	0	0	0	3.6	106	22.3	140	1.1	77.4	55.88		0
1146	1835	0	1835	0	1835	0	0	143	142.824	31	1	67	1	1	0	0	0	0	0	0	4	0	1	2	0	0	1	2	0	0	0	0	3.5	105	27.8	89	1.2	75.2	60.19	0	0
1147	1867	0	1867	0	#NULL!	1	0	142	141.712	27	2	49	0	1	0	0	0	0	0	0	4	0	3	4	0	0	1	2	0	0	0	0	5.2	114	21.3	82	1.1	63.4	66.3		0
1148	1819	0	1819	0	1819	0	0	139	139.336	52	2	57	0	1	0	0	0	0	0	0	3	0	3	6	0	0	1	2	0	0	0	0	4.3	113	19.8	121	1.5	38.8	67.09	0	0
1149	1853	0	1853	0	169	1	0	142	141.696	33	2	51	0	1	0	0	0	0	0	0	2	0	2	4	0	0	1	2	1	0	0	0	4.4	110	23	81	1.3	50.2	62.07	0
1150	1837	0	1837	0	87	1	0	143	143.512	21	1	73	0	0	0	0	0	0	0	0	2	0	1	2	0	0	1	2	0	0	0	0	4.7	108	23.7	132	1.2	81.4	51.6	0	0
1151	1823	0	1823	0	1823	0	0	138	141.904	47	1	55	0	1	0	0	0	0	0	0	4	0	3	4	0	0	1	2	0	0	0	0	4.2	105	23.9	344	0.6	153.7	62.65	0	0
1152	1449	0	1449	0	1449	0	0	142	141.744	34	2	46	0	1	0	0	0	0	0	0	2	0	1	1	0	0	1	2	0	0	0	0	4.2	110	21.5	84	0.6	121.8	62.77	0	0
1153	1870	0	1870	0	1021	1	0	144	144.112	40	2	60	0	1	0	0	0	0	0	0	3	0	1	3	0	0	1	1	0	0	0	0	4	107	25	107	1.3	48.3	58.97	0	0
1154	1860	0	1860	0	1352	1	0	139	139.144	22	1	70	1	1	0	0	0	1	0	0	4	0	1	0	0	0	1	1	0	0	0	0	4.6	108	19.7	109	0.9	112.3	58.9	0
1155	1813	0	1813	0	786	1	0	144	143.952	42	1	54	1	1	0	0	0	0	0	0	4	0	1	6	0	0	1	1	0	0	0	0	4.4	113	21.9	97	1.1	78.1	51.74	0	0
1156	762	0	762	0	762	0	0	143	143.416	38	1	61	1	1	0	0	0	1	0	0	3	0	1	0	0	0	1	2	0	0	0	0	4.1	107	24.7	126	1	89	64.13	1
1157	1829	0	1829	0	1829	0	0	144	143.872	35	1	74	1	1	0	0	0	0	0	0	3	0	1	3	0	0	1	1	0	0	0	0	4.6	108	25.6	92	1.2	73.3	60.44	0	0
1158	1789	0	1789	0	1789	0	0	141	141	36	1	62	1	1	1	0	0	0	1	0	4	0	3	4	0	0	1	2	1	0	0	0	3.8	107	21.5	100	4.1	17.7	54.6	0	0
1159	1852	0	1852	0	3	1	0	136	137.6	55	2		0	1	0	0	0	0	0	0	4	0	3	3	0	0	1	1	0	0	0	0	4.6	120	11.2	200	1.4	41.6	66.67	0	0
1160	1821	0	1821	0	41	1	0	139	139.336	28	1	68	0	1	0	0	0	0	0	0	4	0	3	4	0	0	1	2	0	0	0	0	3.6	99	28.2	121	1.8	48.1	55.8	0
1161	1803	0	1803	0	1803	0	0	138	138.128	45	1	83	0	1	0	0	0	0	1	0	4	0	1	3	0	0	1	2	0	0	0	0	4.3	108	20.5	108	1.4	58.3	61.64	0
1162	1815	0	1815	0	1815	0	0	144	143.696	32	1	74	0	1	0	0	0	0	0	0	3	0	1	2	0	0	1	1	0	0	0	0	4.5	107	25.1	81	0.9	104.1	62.86	0	0
1163	1775	0	1775	0	1775	0	0	139	139.288	33	1	85	1	1	0	0	0	0	0	0	3	0	2	4	0	0	1	2	0	0	0	0	3.7	102	29.4	118	1	91.6	65.73	1	0
1164	1822	0	1822	0	1822	0	0	140	140.608	39	1	65	1	1	0	0	0	0	0	0	4	0	2	6	0	0	1	2	0	0	0	0	3.6	102	23.4	138	1	88.6	55.86	0	0
1165	1794	0	1794	0	1794	0	0	143	142.744	32	2	45	0	1	0	0	0	0	0	0	2	0	1	0	0	0	1	2	1	0	0	0	3.9	105	26.2	84	0.8	88.5	53.96	1	0
1166	1770	0	1770	0	1770	0	0	142	142.672	64	1	76	1	1	1	1	0	0	0	0	1	0	2	6	0	0	1	2	0	0	0	0	4	104	25.5	142	0.9	90.4	55.22	0	0
1167	1696	0	1696	0	1696	0	0	139	139.096	25	2		0	1	0	0	0	0	0	0	4	0	1	2	0	0	1	2	1	0	0	0	4.9	110	20.3	106	1	71.9	63.64	0
1168	1689	0	1689	0	1689	0	0	140	139.92	26	2	56	0	1	0	0	0	0	0	0	4	0	1	3	0	0	1	2	0	0	0	0	4.3	105	25.6	95	1.3	52.7	63.24		0
1169	1808	0	1808	0	1808	0	0	135	135.208	44	2	52	0	1	1	0	0	0	0	0	1	0	1	5	0	0	1	1	1	0	0	0	4.4	106	21.3	113	1.1	57.4	59.81	0
1170	1812	0	1812	0	1812	0	0	142	142.336	49	2	35	0	0	0	0	1	0	0	0	4	0	1	3	0	0	1	1	0	0	0	0	3.3	108	28.4	121	0.8	81.2	62.22	0	0
1171	1754	0	1754	0	1754	0	0	143	142.776	31	1	64	1	1	0	0	0	0	0	0	2	0	1	0	0	0	1	1	1	0	0	0	4	108	24.7	86	1.1	83.1	65	0	0
1172	1752	0	1752	0	1752	0	0	138	137.744	29	2	52	0	1	0	0	0	0	0	0	3	0	1	3	0	0	1	1	1	0	0	0	4.2	105	23	84	0.8	90.3		1	0
1173	1735	0	1735	0	1735	0	0	142	141.888	33	1	67	0	1	0	0	0	0	0	0	3	0	1	0	0	0	1	1	1	0	0	0	4.1	104	25.2	93	1.1	82.1	62.63	0	0
1174	1722	0	1722	0	1722	0	0	141	140.792	33	2	50	0	1	0	0	0	0	0	0	2	0	1	3	0	0	1	1	1	0	0	0	4.1	105	23.8	87	0.8	87.9	67.9	0	0
1175	1760	0	1760	0	1760	0	0	142	141.952	44	1	67	1	1	0	0	0	0	0	0	2	0	2	4	0	0	1	2	1	0	0	0	4	108	23.3	97	1.4	58.6	58.77	0	0
1176	1808	0	1808	0	242	1	0	141	140.616	68	1	61	1	1	1	1	0	0	0	0	1	0	2	6	0	0	1	2	1	0	0	0	5.4	115	18.2	76	1.1	70.9	56	0	0
1177	1692	0	1692	0	1692	0	0	143	142.936	63	1	59	1	1	0	0	0	0	0	0	2	0	2	6	0	0	1	1	1	0	0	0	4.3	106	25.1	96	0.9	90.7	62.16	0	0
1178	1140	0	1140	0	1140	0	0	140	139.84	35	1	68	1	1	0	0	0	0	0	0	3	0	1	5	0	0	1	1	1	0	0	0	4.5	109	23	90	1.4	61.4	63.16	1	0
1179	1770	0	1770	0	70	1	0	139	139.32	36	1	72	1	1	0	0	0	0	0	0	2	0	2	5	0	0	1	2	1	0	0	0	4.1	104	22.2	120	1.2	72.9		0	0
1180	1756	0	1756	0	29	1	0	141	140.952	29	1	71	0	1	0	0	0	0	0	0	2	0	1	2	0	0	1	2	1	0	0	0	4.5	108	22.1	97	1.9	44.8		0
1181	1786	0	1786	0	91	1	0	133	138.424	40	2	49	0	1	0	0	0	0	0	0	4	0	3	0	0	0	1	2	1	0	0	0	4.9	111	16.8	439	1.4	44.3	63.81	0
1182	1727	0	1727	0	1727	0	0	138	137.84	50	1	75	1	1	0	0	0	0	0	0	3	0	1	3	0	0	1	1	1	0	0	0	4.1	105	21.6	90	0.8	108.9	66.67	1	0
1183	1677	0	1677	0	1677	0	0	142	143.232	53	1	68	1	1	1	0	0	0	0	0	1	0	2	5	0	0	1	2	1	0	0	0	4.5	107	22.9	177	1.2	67.4	62.88	0
1184	1739	0	1739	0	1739	0	0	141	140.936	41	1	60	1	1	0	0	0	0	1	0	4	0	1	0	0	0	1	1	1	0	0	0	4.5	106	21.8	96	1.2	71	61.34	0	0
1185	1770	0	1770	0	1770	0	0	141	140.84	33	2	58	0	1	0	0	0	0	0	0	2	0	1	3	0	0	1	2	1	0	0	0	3.9	101	25.6	90	1.7	36.8	62.73	0	0
1186	2061	0	2061	0	2061	0	0	144	144.656	53	2	53	0	1	0	0	0	0	0	0	3	0	3	4	0	0	1	2	1	0	0	0	4.7	104	28.4	141	1	61.7	60.4	0	0
1187	1758	0	1758	0	1758	0	0	141	140.92	24	2	75	0	1	1	0	0	0	0	0	2	0	1	3	0	0	1	2	1	0	0	0	4.1	107	22.3	95	0.7	109.4	61.11	0	0
1188	1772	0	1772	0	62	1	0	139	138.808	41	1	59	0	1	0	0	0	0	0	0	4	0	1	4	0	0	1	2	1	0	0	0	4	101	23.6	88	1.6	51	29.75	0
1189	1757	0	1757	0	1757	0	0	140	139.856	46	2	50	0	1	0	0	0	0	0	0	3	0	3	0	0	0	1	2	1	0	0	0	4.1	104	25	91	0.9	71.8	63.24	0	0
1190	1758	0	1758	0	1758	0	0	142	142.064	39	1	79	0	1	0	0	0	0	0	0	3	0	1	0	0	0	1	1	1	0	0	0	3.6	104	26	104	0.7	133.7	66.27	0	0
1191	1677	0	1677	0	1677	0	0	143	143.688	45	1	74	1	1	0	0	0	0	0	0	3	0	2	4	0	0	1	2	1	0	0	0	4	105	25.6	143	1.5	53.9	63.73	0	0
1192	1667	0	1667	0	1667	0	0	140	139.968	32	1	64	0	1	0	0	0	0	0	0	4	0	1	3	0	0	1	2	1	0	0	0	4	105	24	98	1.2	74.7	51.53	0
1193	1749	0	1749	0	1414	1	0	144	144.56	47	2	55	0	1	0	0	0	0	0	0	3	0	3	5	0	0	1	2	1	0	0	0	4.4	110	20.4	135	1.4	42.9	67.86	0
1194	1742	0	1742	0	1742	0	1	129	128.904	43	1	63	1	1	0	0	0	0	0	0	3	0	1	3	0	0	1	1	1	0	0	0	4.2	91	26.8	94	1.3	64.1	62.05	0	1
1195	1661	0	1661	0	1661	0	0	136	137.008	38	2	56	0	1	0	0	0	0	0	0	3	0	2	4	0	0	1	2	1	0	0	0	4.1	97	28.3	163	0.8	85.5	68.24	0
1196	1962	0	1962	0	1962	0	1	135	134.696	51	2	44	0	1	0	0	0	0	0	1	3	0	1	3	0	0	1	2	1	0	0	0	3.7	105	19.8	81	1.1	55.7	66.36	0	0
1197	1736	0	1736	0	735	1	0	143	142.84	49	2	47	0	1	0	0	0	0	0	0	3	0	3	5	0	0	1	2	1	0	0	0	5.3	122	12.9	90	0.9	70.8	64.79	0	0
1198	270	1	270	0	270	0	0	140	140.08	56	2	48	0	1	1	0	0	0	0	0	1	0	3	3	0	0	1	1	1	0	0	0	4.9	111	15.9	105	1.3	45.1	69.81	0	0
1199	1744	0	1744	0	1744	0	0	143	142.888	42	2	43	1	1	0	0	0	0	0	0	4	0	4	5	0	0	1	2	1	0	0	0	4.7	108	23.7	93	1	64.7	56.18	0
1200	1679	0	1679	0	24	1	0	141	141.112	49	2	68	0	1	0	0	0	0	0	0	3	0	3	7	0	0	1	2	1	0	0	0	4.9	112	21.5	107	1.8	31.8	53.33		0
1201	1689	0	1689	0	1689	0	0	141	142.824	44	2	48	0	1	1	0	0	0	0	0	1	0	1	6	0	0	1	1	1	0	0	0	5	104	27.5	214	0.9	72.4	58.21	0	0
1202	1730	0	1730	0	1730	0	0	137	137.112	54	1	51	1	1	0	0	0	0	0	0	3	0	2	6	0	0	1	2	1	0	0	0	4.6	102	23.4	107	0.8	107.2	44.17	0	0
1203	2019	0	2019	0	2019	0	0	141	140.936	36	2	56	0	1	0	0	0	0	0	0	4	0	1	3	0	0	1	1	1	0	0	0	3.8	105	21.6	96	0.8	86.4	66.2	0	0
1204	1659	0	1659	0	1659	0	0	137	137.176	52	2	68	0	1	1	0	0	0	0	0	4	0	2	4	0	0	1	1	1	0	0	0	3.8	100	25.1	111	0.8	80.2	53.57	0	0
1205	1717	0	1717	0	1717	0	0	139	140.696	41	2	57	0	1	0	0	0	0	0	0	1	0	1	3	0	0	1	1	1	0	0	0	5.1	105	23.1	206	1	65	57.35	0	0
1206	1726	0	1726	0	1726	0	0	143	143.384	46	2	52	0	0	0	0	0	0	0	0	3	0	3	3	0	0	1	2	1	0	0	0	4.1	107	26	124	0.8	82.2	67.92	0
1207	610	0	610	0	610	0	0	139	138.888	40	2	45	0	1	0	0	0	1	0	0	3	0	2	5	0	0	1	2	1	0	0	0	4.4	106	24.1	93	1	65.4	57.94	0	0
1208	1637	0	1637	0	1637	0	0	139	138.728	62	1	68	1	1	0	0	0	0	0	0	1	0	2	5	0	0	1	2	1	0	0	0	4.4	106	23.7	83	1.3	59.5	62.34	1
1209	1637	0	1637	0	1637	0	0	140	140.224	35	2	40	0	1	1	0	0	0	0	0	3	0	1	4	0	0	1	2	1	0	0	0	3.3	104	26.5	114	0.6	121.1	55.1	0
1210	1687	0	1687	0	1687	0	0	141	140.888	34	1	74	0	1	0	0	0	0	0	0	3	0	1	3	0	0	1	1	1	0	0	0	4.9	109	23.4	93	1.1	81.6	53.3	0	0
1211	1677	0	1677	0	1677	0	0	142	142.016	32	1	72	1	1	0	0	0	0	0	0	4	0	1	3	0	0	1	1	1	0	0	0	4	106	22.6	101	1.9	44	57.48	0	0
1212	392	1	392	0	392	0	0	141	140.968	49	1	42	0	1	0	0	0	0	0	0	4	0	2	5	0	0	1	2	1	0	0	0	4.5	104	27.8	98	1.1	75.7	65.03	0	0
1213	1557	0	1500	1	1429	1	0	139	138.936	29	1	79	1	1	0	0	0	0	0	0	3	0	1	3	0	0	1	2	1	0	0	0	4.1	107	22.8	96	2	42.3	66.85	0	0
1214	180	0	180	0	180	0	0	140	140.032	36	1	65	0	1	0	0	0	0	0	0	3	0	2	6	0	0	1	2	1	0	0	0	4	106	23.1	102	1	90		1	0
1215	1965	0	1965	0	1965	0	0	141	140.824	36	2	50	0	1	0	0	0	0	0	0	2	1	3	4	0	0	1	2	1	0	0	0	4.1	109	20.1	89				1
1216	1619	0	1619	0	1619	0	0	139	139.224	39	1	91	1	1	1	1	0	0	0	0	2	0	1	6	0	0	1	1	1	0	0	0	4.3	107	22.3	114	1.5	55.5	61.19	0	0
1217	1688	0	1688	0	#NULL!	1	0	141	142.568	35	1	80	1	1	0	0	0	0	0	0	3	0	3	4	0	0	1	2	1	0	0	0	3.8	105	26.8	198	0.8	117.1		0
1218	1667	0	1667	0	1667	0	0	139	139.128	44	1	64	0	1	0	0	0	0	0	0	3	0	3	5	0	0	1	2	1	0	0	0	3.8	108	21.3	108	0.7	130.4
1219	1670	0	1670	0	1670	0	0	140	140.432	39	1	64	1	1	0	0	0	0	0	0	2	0	1	0	0	0	1	1	1	0	0	0	4.3	105	23	127	1	88.6	56.38	0	0
1220	1611	0	1611	0	1611	0	0	145	144.008	34	1	60	0	0	1	0	0	0	0	0	1	0	1	0	0	0	1	1	1	0	0	0	4.4	106	28.9	38	1.1	81.6	62.96	0	0
1221	1668	0	1668	0	1668	0	0	142	141.728	54	2	40	0	1	0	0	0	0	0	0	4	0	1	0	0	0	0	1	1	0	0	0	5	109	23.8	83	0.5	136.9	60.98	0	0
1222	1656	0	1656	0	1656	0	0	141	140.872	61	1	56	1	0	0	0	0	0	0	0	2	0	2	4	0	0	1	1	1	0	0	0	4.4	105	24.2	92	1.1	72.4	56.25	0	0
1223	1649	0	1470	1	1258	1	0	139	138.984	44	2	70	0	1	0	0	0	0	0	0	3	0	1	3	0	0	1	2	1	0	0	0	4.1	107	23.3	99	0.8	83	65.03	0	0
1224	1101	0	1101	0	1101	0	1	135	134.76	63	1	63	0	0	1	1	0	0	0	0	1	0	1	3	0	0	1	1	1	0	0	0	3.6	96	23.9	85	0.8	103.9		0
1225	1650	0	1650	0	1650	0	0	142	141.744	51	1	75	1	1	0	0	0	1	0	0	3	0	3	6	0	0	1	2	1	0	0	0	4.5	111	20.9	84	0.7	126.6	65.77	0	0
1226	1911	0	1911	0	1911	0	0	143	143.192	40	1	65	1	1	1	0	0	0	0	0	3	0	3	2	0	0	1	2	1	0	0	0	4.2	113	19.6	112	2.3	33.7	61.29	0
1227	1645	0	1645	0	1645	0	0	143	143.544	32	1	84	0	1	0	0	0	0	0	0	4	0	1	6	0	0	1	2	1	0	0	0	3.8	105	26.7	134	1.4	62.5	57.71	1	0
1228	1658	0	1658	0	1658	0	0	142	142.24	33	2	64	0	0	0	0	0	0	0	0	3	0	1	3	0	0	1	2	1	0	0	0	4.5	108	23.9	115	0.7	102.6	59.68	0	0
1229	1602	0	1602	0	1602	0	0	141	141.176	24	1	66	0	1	0	0	0	0	0	0	4	0	2	6	0	0	1	1	1	0	0	0	4.1	106	25.9	111	1.3	72.2	64.93	0	0
1230	1605	0	1605	0	1605	0	0	143	142.888	46	2	62	0	1	0	0	0	0	0	0	4	0	1	1	0	0	1	2	1	0	0	0	3.6	105	26.7	93	1.2	51.5	55.91	0	0
1231	1640	0	1640	0	1640	0	0	139	139.096	50	1	58	0	1	0	0	0	0	0	0	4	0	2	4	0	0	1	2	1	0	0	0	5.6	105	27.1	106	0.8	108.9	64	0	0
1232	1649	0	1649	0	565	1	0	140	139.84	34	1	66	0	1	0	0	0	1	0	0	3	0	3	3	0	0	1	1	1	0	0	0	4.1	104	25.5	90	0.8	117.8	66.67	0
1233	1626	0	1626	0	1626	0	0	141	141.288	35	1	62	1	1	0	0	0	0	0	0	4	0	1	3	0	0	1	2	1	0	0	0	4.5	110	20.9	118	1.3	66.9	62.96	0	0
1234	1561	0	1561	0	1561	0	1	131	134.904	52	1	61	1	1	0	0	0	0	0	0	4	0	2	2	0	0	1	2	1	0	0	0	4.7	108	12.5	344	0.8	108.1	62.81	0	0
1235	1576	0	1576	0	1576	0	0	139	138.776	49	1	80	1	1	0	0	0	0	0	0	3	0	2	6	0	0	1	2	1	0	0	0	5.4	110	21.2	86	1.8	42.9	56.73	0	0
1236	1602	0	1602	0	1602	0	0	142	142.032	40	1	69	0	1	0	1	0	0	0	0	3	0	2	6	0	0	1	2	1	0	0	0	5.1	107	24.4	102	1.1	78.9	64.32	0	0
1237	1616	0	1616	0	1616	0	0	137	136.872	54	1	61	1	1	0	0	0	0	0	0	3	0	3	3	0	0	1	1	1	0	0	0	5.1	103	25.5	92	1.1	74.3	63.58	0
1238	1628	0	1628	0	1628	0	0	139	139.864	45	2	50	0	0	0	0	0	0	0	0	2	0	2	5	0	0	1	2	1	0	0	0	4.1	101	27.9	154	1.2	51.7	63.1	0	0
1239	1596	0	1596	0	1596	0	0	142	141.888	47	1	67	1	1	0	1	0	0	0	0	3	0	1	3	0	0	1	1	1	0	0	0	4.2	107	24	93	1.2	69.1	58.44	1
1240	1614	0	1614	0	1614	0	0	138	138.336	48	1	70	0	1	1	1	0	0	0	0	1	0	2	6	0	0	1	2	1	0	0	0	4.4	116	17.9	121	1.4	57.6	57.61	0
1241	359	1	359	0	359	0	0	138	137.92	29	2	46	0	1	0	0	0	0	0	0	4	0	2	3	0	0	1	2	1	0	0	0	4.2	105	27	95	1	69.8		0	0
1242	1541	0	1541	0	1541	0	0	134	139.664	36	1	53	1	1	0	0	0	0	0	0	4	0	3	0	0	0	1	2	1	0	0	0	4.7	96	25.7	454	1.9	42.9	62.03	0	0
1243	1598	0	1598	0	1598	0	0	144	144.336	27	1	55	0	1	0	0	0	0	0	0	2	0	1	3	0	0	1	1	1	0	0	0	3.9	105	27.9	121	1.2	77.3	56.55	1
1244	1594	0	1594	0	1594	0	0	141	140.888	43	1	71	1	1	0	0	0	0	0	0	2	0	1	2	0	0	1	1	1	0	0	0	4.8	111	22.7	93	1.3	64.1	62.02	0	0
1245	1603	0	1603	0	1603	0	0	143	143.096	46	1	63	0	1	0	0	0	0	0	0	4	0	3	1	0	0	1	1	1	0	0	0	3.7	107	24.6	106	1.1	76.7	62.86	0	0
1246	1569	0	1569	0	1569	0	0	141	140.904	47	1	70	1	1	0	0	0	0	0	0	3	0	1	1	0	0	1	2	1	0	0	0	4.7	111	20.7	94	0.8	110.3	59.04	0	0
1247	260	1	240	1	260	0	0	143	144.088	58	1	59	0	1	1	1	0	0	0	0	1	0	1	3	0	0	1	1	1	0	0	0	4.4	106	22.3	168	0.7	123.3	62.77	0
1248	1536	0	1536	0	1536	0	0	142	142.192	27	2	40	0	1	0	0	0	0	0	0	2	0	1	6	0	0	1	2	1	0	0	0	4.5	107	24.4	112	0.8	91.6	60.77	0
1249	279	1	270	0	279	0	0	133	137.72	52	1	67	1	1	1	0	0	0	0	0	1	0	1	4	0	0	1	1	1	0	0	1	3.4	99	22.3	395	1	83.5	68.32	0	0
1250	1559	0	1559	0	1559	0	0	144	144.08	45	1	70	1	1	0	0	0	0	0	0	3	0	2	3	0	0	1	1	0	0	0	0	3.3	104	24.8	105	1.3	63.6	59.56	0	0
1251	1571	0	1571	0	1571	0	0	141	140.856	32	2	56	0	1	0	0	0	0	0	0	3	0	1	3	0	0	1	1	1	0	0	0	4.4	110	21.2	91	0.8	88.5	65.52	0	0
1252	773	0	773	0	773	0	0	138	138.16	39	2	50	0	0	0	0	0	0	0	0	2	0	1	3	0	0	1	2	1	0	0	0	4.2	105	21.4	110	1	65.7	59.09	1	0
1253	1561	0	1561	0	1561	0	0	141	142.648	36	1	82	0	1	0	0	0	0	0	0	2	0	1	3	0	0	1	1	1	0	0	0	3.8	104	25.8	203	0.9	101.6	64.86	1	0
1254	1573	0	1573	0	1573	0	0	139	138.904	59	1	64	0	1	0	0	0	0	0	0	2	0	1	3	0	0	1	2	0	0	0	0	5.1	106	23.2	94	0.9	91.9	68.93	0	0
1255	1535	0	1535	0	1535	0	0	141	140.808	67	2	44	0	0	0	0	0	1	0	0	2	0	1	3	0	0	1	2	0	0	0	0	4.3	103	27.4	88	0.8	76.2	63.38	1	0
1256	1536	0	1536	0	1536	0	0	141	140.728	35	2	42	0	1	0	0	0	0	0	0	2	0	3	6	0	0	1	2	1	0	0	0	3.8	104	26.4	83	0.9	75.9	61.54	0	0
1257	1562	0	1562	0	1562	0	0	142	142.976	27	2	52	0	1	1	0	0	0	0	0	2	0	1	3	0	0	1	2	1	0	0	0	4.1	105	24.7	161	0.8	91.6	56.82	0	0
1258	1498	0	1498	0	1498	0	0	142	142.048	51	1	58	1	1	0	1	0	0	0	0	4	0	2	6	0	0	1	2	1	0	0	0	3.7	106	25.8	103	1.4	56.9	57.14	0	0
1259	1488	0	1488	0	1488	0	0	137	137.112	54	1	72	1	1	0	0	0	0	0	0	3	0	3	3	0	0	1	1	1	0	0	0	5.1	101	28.6	107	0.7	125.1	65.07	1
1260	1558	0	1558	0	1558	0	0	143	142.888	39	1	61	0	1	1	0	0	0	0	0	3	0	2	4	0	0	1	2	1	0	0	0	4	110	22.8	93	1.5	55.5	59.29	1	0
1261	1533	0	1533	0	1533	0	0	143	142.616	56	1	83	0	1	1	0	0	0	1	0	1	0	2	5	0	0	1	2	1	0	0	0	3.7	100	28.8	76	1.4	55.8	60.24	0	0
1262	1515	0	1515	0	377	1	0	142	141.984	51	1	60	0	1	0	0	0	0	0	0	2	0	2	4	0	0	1	1	1	0	0	0	4.7	105	27.2	99	1.8	42.6	61.04	0	0
1263	1449	0	1449	0	1449	0	0	142	141.808	37	2	51	0	1	0	0	0	0	0	0	2	0	1	2	0	1	1	2	1	0	0	0	4	108	25.9	88	0.7	100.2	57.55	0	0
1264	1537	0	1537	0	1537	0	0	137	136.808	40	2	41	0	0	0	0	0	0	0	0	3	0	2	3	0	0	1	1	1	0	0	0	4.1	109	18.3	88	1.3	48.3	68.92		0
1265	1496	0	1496	0	1496	0	0	140	139.808	44	2	53	0	1	0	0	0	0	0	0	4	0	2	4	0	0	1	1	1	0	0	0	5	111	18.9	88	0.7	96.8	57.66	0	0
1266	1490	0	1490	0	1490	0	0	143	143.032	41	1	68	0	1	0	0	0	0	1	0	4	0	2	5	0	0	1	2	0	0	0	0	4.5	108	25.9	102	0.9	99	62.75	1
1267	1528	0	1528	0	1528	0	0	142	142.064	32	1	67	1	1	0	0	0	0	0	0	2	0	1	3	0	0	1	1	0	0	0	0	4.6	109	26.4	104	1.3	68.1	59.12	0	0
1268	1521	0	1521	0	1521	0	0	143	143.016	31	2	54	0	1	0	0	0	0	0	0	3	0	1	3	0	0	1	2	0	0	0	0	3.3	104	25.8	101	1	68.8	60.82	1	0
1269	1481	0	1481	0	1481	0	0	140	140.336	35	1	74	1	1	0	0	0	0	0	0	2	0	1	3	0	0	1	2	0	0	0	0	3.7	99	24.3	121	2	40.7	67.71	1	0
1270	1536	0	1536	0	1536	0	0	143	142.968	54	2	50	0	1	1	0	0	0	0	0	3	0	1	3	0	0	1	2	0	0	0	0	4.8	110	27	98	0.7	92.8	65.28	0	0
1271	1537	0	1537	0	1470	1	0	138	138.368	56	2	54	0	1	0	0	0	0	0	0	1	0	1	2	0	0	1	2	0	0	0	0	4.1	102	25.9	123	1	61.1	62.9	1	0
1272	1511	0	1511	0	1511	0	0	141	140.936	33	1	55	1	1	0	0	0	0	1	0	4	0	1	2	0	0	1	2	0	0	0	0	4.6	107	29	96	1.2	74.2	43.08	0	0
1273	1486	0	1486	0	1486	0	0	141	140.84	45	2	41	0	1	0	0	0	0	0	0	4	0	1	3	0	0	1	2	0	0	0	0	4.5	107	21.7	90	0.6	115.1	61.24	0	0
1274	1481	0	1481	0	1481	0	0	141	141.112	44	1	56	1	1	0	0	0	1	0	0	2	0	1	5	0	0	1	1	0	0	0	0	4.3	107	22.2	107	1.2	70	68.03	1	0
1275	1827	0	1827	0	111	1	0	145	144.888	27	1	104	1	1	0	0	0	0	0	0	4	0	1	3	0	0	1	1	0	0	0	0	4.2	105	24.5	93	1	95.4	56.34	0	0
1276	1465	0	1465	0	1292	1	0	142	141.872	28	1	53	0	1	0	0	0	0	0	0	3	0	1	3	0	0	1	1	0	0	0	0	4.4			92	0.8	122.5	60.95	0
1277	1516	0	1516	0	1516	0	0	140	140.208	41	1	84	1	1	0	0	0	0	0	0	2	0	1	3	0	0	1	1	1	0	0	0	3.9			113	1.1	78.5	66.88	0	0
1278	1459	0	1459	0	1459	0	0	141	140.792	42	2	45	0	1	0	0	0	0	0	0	3	0	3	1	0	0	1	2	0	0	0	0	3.7	116	14.4	87	1.1	58	63.89	0
1279	1519	0	1519	0	1519	0	0	141	141.832	46	1	59	0	1	1	0	1	1	1	0	1	0	1	3	0	0	1	2	0	0	0	0	4.5	103	26.3	152	1	85.6	60	0	0
1280	1503	0	1503	0	1503	0	0	140	140.096	31	2	41	0	1	0	0	0	0	0	0	3	0	3	6	0	0	1	2	0	0	0	0	3.8	104	22.2	106	0.7	103.9	62.79	0
1281	1482	0	1482	0	1303	1	0	138	143.12	53	1	77	1	1	1	1	0	0	0	0	1	0	1	3	0	0	1	1	0	0	0	0	4.8			420	1.3	61.5	62.28	0	0
1282	1414	0	1414	0	1414	0	0	142	141.936	34	2	48	0	1	0	0	0	0	0	0	3	0	1	1	0	0	1	2	0	0	0	0	4	105	25.7	96	1.6	39.3	64.04	0	0
1283	1470	0	1470	0	684	1	0	142	142.784	49	1	59	0	1	1	0	0	0	0	0	1	0	1	3	0	0	1	2	0	0	0	0	3.9	101	27.1	149	1.1	75.7	53.06	1	0
1284	1484	0	1484	0	1484	0	0	141	140.904	50	2	54	0	1	0	0	0	0	0	0	4	0	2	5	0	0	1	1	0	0	0	0	3.7			94	0.8	80.8	64.34	0	0
1285	1492	0	1492	0	1492	0	0	139	139.208	45	1	89	0	1	0	0	0	0	0	0	2	0	1	1	0	0	1	1	0	0	0	0	4.4			113	1.1	77.1		0	0
1286	1474	0	1474	0	1474	0	0	142	142.176	46	1	50	0	1	0	0	0	0	0	0	2	1	2	2	0	0	1	1	0	0	0	0	3.9	108	26.9	111			54.55	0	0
1287	1758	0	1758	0	1758	0	0	142	142.768	53	2	60	0	1	0	0	0	0	0	0	3	0	4	3	0	0	1	2	0	0	0	0	4.4			148	0.8	79.9	63.04	0
1288	1469	0	1469	0	1469	0	0	141	141.16	49	1	56	1	1	0	0	0	0	0	0	3	0	3	4	0	0	1	2	0	0	0	0	3.8			110	0.9	95.5	58.33	0	0
1289	1752	0	1752	0	1752	0	0	141	141.032	49	1	61	1	1	0	0	0	0	0	0	3	0	2	4	0	0	1	1	0	0	0	0	4.3			102	1	84.5	59.88	0	0
1290	1451	0	1451	0	1451	0	0	141	141.112	32	2	56	0	1	0	0	0	0	0	0	4	0	3	3	0	0	1	2	0	0	0	0	4.2	107	24.3	107	0.9	77.2	57	0	0
1291	1424	0	1424	0	1424	0	0	140	140.208	43	1	104	1	1	0	0	0	0	1	0	4	0	2	5	0	0	1	2	0	0	0	0	4.4	107	23.9	113	1.2	70.3	55.17	0	0
1292	1419	0	1419	0	1419	0	0	140	139.904	38	1	78	1	1	0	0	0	0	0	0	4	0	4	5	0	0	1	2	0	0	0	0	4.3			94	1	89	65.98	0	0
1293	1483	0	1483	0	1483	0	0	139	139.464	35	2	58	0	1	1	0	0	0	0	0	2	0	1	2	0	0	1	2	1	0	0	0	4.3	102	27.2	129	1.2	54.4	60.29	0	0
1294	1431	0	1431	0	1431	0	0	143	142.648	44	2	99	0	1	0	0	0	0	0	0	1	0	2	5	0	0	1	1	1	0	0	0	4.3	101	28	78	0.9	72.4	60.16	0	0
1295	1429	0	1429	0	1429	0	0	141	140.856	30	1	65	0	0	0	0	0	0	0	0	2	0	1	3	0	0	1	2	1	0	0	0	4.5			91	1.8	47.4	55.88	1	0
1296	1490	0	1490	0	1490	0	0	143	142.44	57	1	64	0	1	1	1	0	0	0	0	1	0	1	3	0	0	1	1	1	0	0	0	4.2			65	1.1	73.5	66.21	0	0
1297	1394	0	1394	0	1394	0	0	141	141.016	37	1	66	0	1	0	0	0	0	0	0	4	0	1	3	0	0	1	1	1	0	0	0	4.1			101	1	89.5	65.74	0	0
1298	752	0	752	0	606	1	0	142	142.096	33	1	66	0	0	0	0	0	0	0	0	2	0	3	7	0	0	1	1	1	0	0	0	4.4			106	1.6	53.3	68		0
1299	1360	0	1360	0	1360	0	0	139	138.888	41	2	51	0	0	0	0	0	0	0	0	3	0	2	5	0	0	1	2	1	0	0	0	3.7			93	0.8	84.2	62.79	0	0
1300	1405	0	1405	0	1405	0	0	144	143.712	32	1	80	1	0	0	0	0	0	0	0	4	0	1	0	0	0	0	2	1	0	0	0	3.9	107	29.3	82	1.2	74.7	61.33	0	0
1301	1425	0	1425	0	82	1	0	137	137.976	57	2	36	0	1	0	0	0	0	0	0	3	0	3	3	0	0	1	1	1	0	0	0	3.5	106	21.7	161	1.5	38.1	55.88	0	0
1302	1467	0	1467	0	1467	0	0	141	141.352	57	2	51	0	1	0	0	0	0	0	0	2	0	3	6	0	0	1	2	1	0	0	0	4.4	105	26.8	122	1	60.8	56.12	0	0
1303	1617	0	1617	0	1617	0	0	141	141.128	46	1	69	0	1	0	0	0	0	0	0	3	0	4	6	0	1	1	2	1	0	0	0	4.3	110	21	108	1.6	49.8	64.32	1
1304	1453	0	1453	0	1453	0	0	139	138.984	52	1	69	0	1	0	0	0	0	0	0	3	0	1	3	0	0	1	2	1	0	0	0	5.3			99	1.3	61.7	67.08	0	0
1305	1366	0	1366	0	1366	0	0	142	141.824	28	1	66	0	1	0	0	0	0	0	0	2	0	1	0	0	0	0	2	1	0	0	0	4.2	107	27.3	89	1	94.7	59.15	0	0
1306	1451	0	1451	0	1451	0	1	132	132.256	46	2		0	1	0	0	0	0	0	0	3	0	3	7	0	0	1	1	1	0	0	0	4.9	104	22.3	116	0.4	182.9		1
1307	879	0	879	0	363	1	0	140	140.016	33	1		1	1	0	0	0	0	0	0	3	0	1	1	0	0	1	2	1	0	0	0	4.4	107	21.7	101	1.1	82.1	55.75	0	0
1308	1433	0	1433	0	1433	0	0	139	139.384	55	1	66	0	1	0	0	0	0	0	0	3	0	3	4	0	0	1	2	1	0	0	0	4.9	108	24.6	124	1.1	74	61.19	0
1309	1434	0	1434	0	1434	0	0	143	143.368	64	1	59	1	1	1	1	0	1	0	0	1	0	2	4	0	0	1	2	1	0	0	0	5.1	106	25.2	123	1.3	59.2	67.37	0	0
1310	1387	0	1387	0	55	1	0	142	142.496	34	1	80	0	1	0	0	0	0	0	0	3	0	1	3	0	0	1	2	1	0	0	0	5.4	112	21.2	131	1.7	49.4	57.69	0	0
1311	1430	0	1430	0	1430	0	0	139	140.744	43	1	83	1	1	1	1	0	0	0	0	1	0	2	3	0	0	1	2	1	0	0	0	4.8			209	1.3	64.1	61.11	0	0
1312	1395	0	1395	0	1395	0	0	138	137.776	33	2	51	0	0	0	0	0	1	0	0	3	0	1	3	0	0	1	2	1	0	0	0	4.4			86	0.7	102.6	59.32	0	0
1313	1353	0	1353	0	1353	0	0	141	140.888	45	2	56	0	1	0	0	0	0	0	0	3	0	1	2	0	0	1	2	1	0	0	0	4.3	105	27.1	93	0.6	115.1	67.57	1	0
1314	1418	0	1418	0	1418	0	0	144	143.952	29	1	61	0	1	0	0	0	0	0	0	3	0	1	2	0	0	1	2	1	0	0	0	4.4	108	26.4	97	1.7	51	64.71	0
1315	1449	0	1449	0	1449	0	0	142	141.872	46	2	52	0	1	0	0	0	0	0	0	4	0	1	3	0	0	1	1	1	0	0	0	3.7	109	23.1	92	0.6	114.6	63.89	0	0
1316	133	1	120	0	133	0	0	140	140.128	47	1	57.5	1	1	1	0	0	0	0	0	1	0	3	3	0	0	1	2	1	0	0	0	4.4	104	26.7	108	1.1	76.4	61.96	0	0
1317	1160	0	1160	0	1160	0	1	127	130.808	33	1	50	0	1	1	1	0	0	0	0	1	0	3	3	0	0	1	1	1	0	0	0	4	98	17	338	0.9	103.5	53.21	0
1318	1707	0	1707	0	1707	0	0	141	140.76	54	1	70	0	1	0	0	0	0	0	0	4	0	2	4	0	1	1	1	1	0	0	0	5.6	112	19.5	85	1.5	51.9	57.97	0	0
1319	1349	0	1349	0	1349	0	0	138	138.064	34	1	55	0	1	0	0	0	0	0	0	2	0	1	3	0	0	1	1	1	0	0	0	4.2	105	24.3	104	1.7	49.4	57.97	0	0
1320	1391	0	1391	0	1391	0	0	144	143.904	49	2	57	0	1	0	0	0	0	0	0	4	0	3	3	0	0	1	2	1	0	0	0	3.8	108	26	94	0.7	94.7	68.49	0	0
1321	1390	0	1390	0	1390	0	0	139	138.872	62	1	54	0	1	0	0	0	0	0	0	4	0	3	6	0	0	1	2	1	0	0	0	4.8	106	24.9	92	0.8	104.3	59.59	0	0
1322	1683	0	1683	0	1683	0	1	133	133.368	40	2		0	0	1	0	0	1	0	0	4	0	4	6	0	0	1	2	0	0	0	0	3.8	104	19.4	123	0.9	73.8	67.24	0	0
1323	1402	0	1402	0	1402	0	0	143	142.968	58	2		0	1	0	0	0	0	0	0	4	0	3	6	0	0	1	1	1	0	0	0	4.1	106	28.2	98	0.8	78.4	59.21	0	0
1324	1418	0	1418	0	1418	0	0	144	143.984	36	1	67	0	1	0	0	0	0	0	0	4	0	4	4	0	0	1	2	1	0	0	0	4.1	110	21.9	99	1.1	80.6	55.17	0	0
1325	1409	0	1409	0	1409	0	0	139	141.096	47	1	59	0	1	0	0	0	0	0	0	4	0	1	0	0	0	0	1	1	0	0	0	4.8	103	22.4	231	1.5	53.4	61.8	0	0
1326	1339	0	1339	0	1339	0	0	143	142.952	63	1	61	1	1	1	0	0	1	0	0	4	0	1	3	0	1	1	2	1	0	0	0	3.9	108	25.5	97	1.7	43.6	61.47	0
1327	1296	0	1296	0	1296	0	0	141	141.112	49	1	70	1	1	0	0	1	0	0	0	4	0	1	3	0	0	1	1	1	0	0	0	4.5	107	23.5	107	1.1	75.7	59.54	1
1328	1355	0	1355	0	1355	0	0	143	142.952	56	1	75	0	1	0	0	0	0	0	0	4	0	1	0	0	0	0	1	1	0	0	0	4.1	108	20.5	97	1	82.3	63.56	0	0
1329	1302	0	1302	0	1302	0	0	139	139.336	45	2	53	0	1	0	0	0	0	0	0	4	0	1	3	0	1	1	2	1	0	0	0	4	104	26	121	0.8	82.6	60.14	0
1330	1371	0	1371	0	1371	0	0	139	138.952	34	1	61	0	1	1	0	0	0	0	0	4	0	4	0	0	0	1	2	0	0	0	0	4.6	106	20.5	97	0.7	137.4	63.39		0
1331	1331	0	1331	0	1331	0	0	136	135.904	58	1	67	1	1	0	1	0	0	0	0	4	0	1	3	0	0	1	1	1	0	0	0	4.5	103	24.5	94	0.9	92.3	70.13	0	0
1332	1369	0	1369	0	1369	0	0	139	138.904	27	2	50	0	1	0	0	0	0	0	0	4	0	1	2	0	0	1	1	1	0	0	0	4	105	23.3	94	0.8	91.6	46.32	0	0
1333	1396	0	1396	0	1396	0	0	141	140.888	50	1	56	0	1	0	0	0	0	0	0	4	0	1	3	0	0	1	1	1	0	0	0	4.3	108	22.5	93	0.9	95.1	55.77	0	0
1334	1394	0	1394	0	1394	0	0	138	137.888	44	2	44	1	1	0	0	0	0	0	0	4	0	2	5	0	0	1	2	1	0	0	0	4	105	21.2	93	0.9	72.4	69.33	0	0
1335	1384	0	1384	0	1384	0	0	142	141.904	30	2	51	0	1	0	0	0	0	0	0	4	0	1	3	0	0	1	1	1	0	0	0	4.8	107	26.3	94	0.7	104.6	54.87	0	0
1336	1315	0	1315	0	1315	0	1	133	133.56	53	1	54	1	1	1	0	0	0	0	0	4	0	2	5	0	0	1	1	1	0	0	0	4.6	99	24	135	1.5	52.1	61.79	0	0
1337	186	0	186	0	186	0	0	142	141.824	35	1	66	1	1	0	0	0	0	0	0	4	0	2	6	0	0	1	2	1	0	0	0	4	107	21.4	89	0.9	102.2	57.41	0
1338	1650	0	1650	0	1650	0	0	138	138	37	2	47	0	1	0	0	0	0	0	0	4	0	2	5	0	1	1	2	1	0	0	0	3.6	104	26.7	100	1.6	38.6	56.82	0	0
1339	1344	0	1344	0	1344	0	0	139	139.144	50	1	71	1	1	0	0	0	0	0	0	4	0	1	3	0	0	1	2	1	0	0	0	4.4	110	19.6	109	1.3	62.2	61.21	0	0
1340	1332	0	1332	0	1332	0	0	138	137.712	32	2		0	1	1	0	0	1	0	0	4	0	4	3	0	0	1	2	0	0	0	0	3.9	102	25.8	82	0.8	88.5	58.67	1	0
1341	1328	0	1328	0	1328	0	0	141	140.888	30	2	42	0	1	0	0	0	0	0	0	4	0	1	3	0	0	1	2	1	0	0	0	4.3	108	21.4	93	1.4	47	54.84	0	0
1342	1318	0	1318	0	1318	0	0	139	139.208	41	1	67	0	0	0	0	0	0	0	0	4	0	2	5	0	0	1	2	1	0	0	0	4.1	104	26.3	113	0.7	132.3	63.76	1	0
1343	1380	0	1380	0	152	1	0	142	142.352	57	2	65	0	1	0	1	0	1	0	0	4	0	2	3	0	0	1	2	1	0	0	0	5.1	111	20.1	122	1.6	35.4	60.71	0	0
1344	1288	0	1288	0	711	1	0	143	143.224	31	1	98	0	1	0	0	0	0	0	0	4	0	1	2	0	0	1	2	1	0	0	0	4.2	105	27.2	114	0.9	104.8	59.63	1	0
1345	1668	0	1668	0	1668	0	0	141	140.84	44	2	58	0	1	0	0	0	0	0	0	4	0	1	0	0	1	1	2	1	0	0	0	3.9	107	24.6	90	0.7	96.8	57.78	1	0
1346	1329	0	1329	0	1329	0	0	141	140.984	22	2	64	0	1	0	0	0	0	0	0	4	0	1	2	0	0	1	2	1	0	0	0	4.1	105	23.4	99	0.8	95.5	68.47	0	0
1347	1343	0	1343	0	1343	0	0	141	140.968	41	1	77	0	1	0	0	0	0	0	0	4	0	2	5	0	0	1	2	1	0	0	0	4.2	105	23.4	98	1.2	71	60.25	0	0
1348	1369	0	1369	0	1369	0	0	139	139.016	40	1		1	1	0	0	0	0	0	0	4	0	3	7	0	0	1	2	1	0	0	0	3.9	100	29.2	101	0.9	99.5	58.79	0	0
1349	1360	0	1360	0	1360	0	0	143	143.016	37	1	75	0	1	0	0	0	0	0	0	4	0	1	2	0	0	1	2	1	0	0	0	4.9	106	25.6	101	1.4	60.7	65.35	0	0
1350	1312	0	1312	0	1312	0	0	139	138.76	43	2	54	0	1	0	0	0	0	0	0	4	0	1	0	0	0	0	1	1	0	0	0	4.4	108	19	85	0.6	116.2	66.67	0
1351	1278	0	1278	0	1278	0	0	139	139.656	33	1	84	0	1	0	0	0	0	0	0	4	0	2	6	0	0	1	2	1	0	0	0	4.1	106	21.3	141	1.4	62.1	64.06	0	0
1352	1354	0	1354	0	1354	0	0	141	140.84	34	1	68	0	1	0	0	0	0	0	0	4	0	1	0	0	0	0	2	1	0	0	0	4.8	105	23.4	90	1.2	73.8	62.21	0	0
1353	1353	0	1353	0	1353	0	0	140	140	45	2	47	0	0	0	0	0	0	0	0	4	0	1	2	0	0	1	2	1	0	0	0	5.1	104	24.2	100	0.7	96.3	57.27	0	0
1354	1286	0	1286	0	1286	0	1	132	132.256	32	2		0	1	1	0	0	0	0	0	4	0	4	5	0	0	1	2	0	0	0	0	4.1	102	22.1	116	0.7	103.2	63.1	1	0
1355	1287	0	1287	0	1287	0	0	144	144.128	40	1	71	0	1	1	0	0	0	0	0	4	0	2	2	0	0	1	2	1	0	0	0	4.3	105	23.6	108	1.1	78.9	57.72	0	0
1356	1303	0	1303	0	1303	0	0	144	143.92	55	2	54	0	1	0	0	0	0	0	0	4	0	1	5	0	0	1	1	1	0	0	0	4.6	107	23.8	95	0.7	92.5		1	0
1357	1320	0	1320	0	1320	0	0	141	141	28	1	65	0	1	0	0	0	0	0	0	4	0	1	3	0	1	1	2	1	0	0	0	4.1	103	24.1	100	1.2	76.7	60.71	0	0
1358	1265	0	1265	0	1265	0	0	140	139.872	37	2	47	0	1	0	0	0	0	0	0	4	0	2	3	0	0	1	1	1	0	0	0	3.9	103	24.7	92	0.7	100.2	60	0	0
1359	1240	0	1240	0	432	1	0	139	139.208	48	1	63	1	1	0	0	0	0	0	0	4	0	1	3	0	0	1	2	1	0	0	0	4.2	116	11.5	113	1.2	68.8	64.58	1	1
1360	1608	0	1608	0	1608	0	0	141	142.152	39	2	56	0	1	1	0	0	0	0	0	4	0	1	3	0	0	1	2	1	0	0	0	4.9	98	28.6	172	0.9	74.2	61.62	1	0
1361	1593	0	1593	0	1593	0	0	137	136.792	30	2	45	0	1	0	0	0	0	0	0	4	0	1	0	0	0	0	1	1	0	0	0	4.2	102	25.3	87	0.7	104.6	67.68	1	0
1362	1242	0	1242	0	1242	0	0	141	140.744	41	2	49	0	1	0	0	0	0	0	0	4	0	4	5	0	0	1	2	0	0	0	0	4.3	106	22	84	1.2	52.7	57.14	0
1363	1295	0	1295	0	1295	0	0	143	143	48	1	61	1	1	0	0	0	0	0	0	4	0	2	4	0	0	1	2	1	0	0	0	3.8	105	24.8	100	1.7	46	55.62	0	0
1364	1229	0	1229	0	1229	0	0	142	142.08	61	2	68	0	1	0	0	0	0	0	0	4	0	1	4	0	0	1	2	1	0	0	0	3.9	106	21.9	105	1.2	48.6	59.52	0	0
1365	1245	0	1245	0	1245	0	0	144	143.984	46	2	57	0	1	0	1	0	0	1	0	4	0	3	5	0	0	1	2	1	0	0	0	4.1	109	23.7	99	0.7	95.9	55.81	0	0
1366	1255	0	1255	0	90	1	0	143	142.856	45	1	68	1	1	0	0	0	0	0	0	4	0	2	6	0	1	1	2	1	0	0	0	4.1	107	23.8	91	1.4	58.3	45.74	0	0
1367	450	1	450	0	450	0	0	136	136.816	58	1	59	0	1	1	0	0	0	0	0	4	0	1	3	0	1	1	2	1	0	0	0	4.5	101	23.1	151	0.8	105.7	60	0	0
1368	1222	0	1222	0	1222	0	0	142	142.192	52	1	65	0	1	0	0	0	0	0	0	4	0	2	5	0	0	1	1	1	0	0	0	5	108	22.7	112	1.3	61.7	68.33	0	0
1369	152	0	152	0	152	0	0	134	136.944	28	2	51	0	1	1	0	0	0	0	0	4	0	1	4	0	0	1	1	1	0	0	0	4.6	103	24	284	0.9	79.4	58.1	0	0
1370	1291	0	1260	1	691	1	0	140	140.544	43	2	59	1	1	1	0	0	0	0	0	4	0	1	6	0	0	1	1	1	0	0	0	3.7	103	24.5	134	0.8	83.3	62.5	0	0
1371	1272	0	1272	0	1272	0	0	145	144.776	54	2	53	0	0	0	0	0	0	0	0	4	0	1	3	0	0	1	1	1	0	0	0	3.9	109	23.1	86	0.7	92.8	60.92	1	0
1372	1554	0	1554	0	1554	0	0	142	141.856	33	1	68	1	1	0	0	0	0	0	0	4	0	1	5	0	1	1	2	1	0	0	0	4.2	108	23.4	91	1.3	67.7	51.02	0	0
1373	1236	0	1236	0	1	1	0	140	140.08	30	1	63	0	1	0	0	0	0	0	0	4	0	4	3	0	0	1	2	1	0	0	0	3.7	104	24.7	105	1.4	63.3	53.09	0
1374	1231	0	480	1	435	1	0	140	139.824	49	1	67	0	1	0	0	0	0	0	1	4	0	3	4	0	0	1	2	1	0	0	0	4.8	112	16.2	89	1.4	57.3	60.66	0	0
1375	1253	0	1253	0	1253	0	0	144	143.856	34	1	53	1	1	0	0	0	0	0	0	4	0	1	3	0	0	1	1	1	0	0	0	4.8	103	26.4	91	1.1	81.6	60	0	0
1376	1214	0	1214	0	1214	0	0	140	139.808	28	2	42	0	1	1	0	0	1	0	0	4	0	1	3	0	0	1	2	1	0	0	0	4.1	107	22.6	88	1.3	51.9	62.5	0	1
1377	966	0	966	0	966	0	0	140	140.016	44	1	69	0	1	0	0	0	0	0	0	4	0	1	3	0	0	1	2	1	0	0	0	5.2	107	22.2	101	1	86.4	60.81	0	0
1378	1282	0	1282	0	1282	0	0	141	140.808	44	2	52	0	1	0	0	0	0	0	0	4	0	2	3	0	0	1	1	1	0	0	0	3.7	104	26	88	0.9	72.4	59.74	0	0
1379	1263	0	1263	0	415	1	0	142	142.624	52	2	65	0	1	0	0	0	0	0	0	4	0	1	3	0	0	1	1	1	0	0	0	3.8	109	21.6	139	0.7	93.5	57.02	1	0
1380	1211	0	1211	0	1211	0	0	141	140.808	27	1	76	0	1	0	0	0	0	0	0	4	0	1	3	0	0	1	1	1	0	0	0	4.6	113	17.1	88	1.5	59.8	66.42	0	0
1381	1221	0	1221	0	1221	0	0	139	138.776	52	2	52	0	0	0	0	0	0	0	0	4	0	1	3	0	0	1	1	1	0	0	0	3.8	102	24.2	86	1.8	31.5	62.35	0	0
1382	1196	0	1196	0	221	1	0	139	138.744	46	2		0	1	0	0	0	1	0	0	4	0	3	4	0	0	1	2	1	0	0	0	4.3	113	16.6	84	1.5	39.8	64.81	0	0
1383	1242	0	1242	0	1242	0	0	141	141.08	53	2		0	1	0	0	0	0	0	0	4	0	4	4	0	0	1	1	1	0	0	0	5.1	115	18.3	105	0.8	79.9	65.38	0	0
1384	1222	0	1222	0	1222	0	0	136	135.648	55	1	59	0	1	1	0	0	0	0	0	4	0	1	3	0	0	1	1	1	0	0	0	3.7	97	24.6	78	1.1	74	63.38	0	0
1385	1271	0	1271	0	54	1	0	139	139.032	40	1	62	0	1	0	0	0	0	0	0	4	0	1	3	0	0	1	2	1	0	0	0	4	108	20.2	102	1.4	59.8	57.03	0	0
1386	1115	0	1115	0	1059	1	0	140	143.632	52	1	57	1	1	1	1	0	0	0	1	4	0	1	5	0	1	1	2	1	0	0	0	5.5	103	24.5	327	0.8	108.1	53.33	0	0
1387	1259	0	1259	0	134	1	0	137	138.504	45	2	73	0	1	1	0	0	0	0	0	4	0	2	4	0	0	1	2	1	0	0	0	3.8	108	19	194	1.2	51.7	57.26	0	0
1388	338	1	338	0	338	0	0	141	141.304	44	2	49	0	0	0	0	0	0	0	0	4	0	1	3	0	0	1	1	1	0	0	0	4	109	21.8	119	0.6	115.6	64.81	0	0
1389	1181	0	1181	0	1181	0	0	141	141.432	46	2	59	0	1	1	0	0	0	0	0	4	0	1	0	0	0	0	1	1	0	0	0	4.6	103	24.1	127	1.1	56.9	67.86	0	0
1390	1241	0	1241	0	1241	0	0	138	138.032	55	2	47	0	1	1	0	0	0	0	0	4	0	2	5	0	1	1	2	1	0	0	0	4.8	106	19.8	102	0.8	79.3	60.76	0	0
1391	1173	0	1173	0	#NULL!	1	0	137	137.64	35	2	49	0	1	0	0	0	0	0	0	4	0	1	3	0	0	1	2	1	0	0	0	4.5	102	23.1	140	1.1	60.2	58.76	0
1392	1172	0	1172	0	1172	0	0	139	138.84	49	2	53	0	1	0	0	0	0	0	0	4	0	1	4	0	0	1	2	1	0	0	0	3.9	106	22.5	90	0.8	81.2	66.67	0
1393	1181	0	1181	0	1181	0	0	138	137.856	36	2	41	0	0	0	0	0	0	0	0	4	0	2	4	0	0	1	1	1	0	0	0	3.8	101	23	91	0.8	86.4	60.71	0	0
1394	1160	0	1160	0	1160	0	0	140	140.064	43	1	58	0	0	0	0	0	1	1	0	4	0	1	2	0	0	1	2	1	0	0	0	4.4	107	24.1	104	1.1	77.8	49.58	0	0
1395	1205	0	1205	0	108	1	0	143	143.032	25	1	52	0	1	0	0	0	1	0	0	4	0	1	3	0	0	1	1	1	0	0	0	4.1	102	27	102	1.7	52.5	65.17	0	0
1396	1179	0	1179	0	1179	0	0	139	138.776	25	2	45	0	1	0	0	0	0	0	0	4	0	1	3	0	0	1	2	1	0	0	0	3.9	104	19.7	86	0.8	93	63.29	0	0
1397	1241	0	1241	0	1241	0	0	140	139.84	52	2	66	0	1	0	0	0	0	0	0	4	0	1	3	0	0	1	1	1	0	0	0	3.5	104	23.6	90	0.8	80.2	66.89	0
1398	1202	0	1202	0	1202	0	0	142	141.936	41	1	62	0	1	0	0	0	0	0	0	4	0	3	7	0	0	1	2	1	0	0	0	4.2	108	23.1	96	0.8	113.4	58.21	1	0
1399	1236	0	1236	0	1107	1	0	137	136.76	65	1	77	0	1	0	1	0	0	0	0	4	0	1	3	0	0	1	1	1	0	0	0	4.3	102	22.1	85	0.8	103.3	43.32	0	0
1400	1239	0	1239	0	1239	0	0	141	141.208	43	1	71	0	1	0	0	0	0	0	1	2	0	1	0	0	0	1	2	1	0	0	0	3.8	107	22.6	113	1	86.8	69.7	0	0
1401	1177	0	1177	0	1177	0	0	140	139.984	33	2	46	0	0	1	0	0	0	0	0	1	0	3	5	0	0	1	2	1	0	0	0	5.4	110	16.7	99	1.5	42.6	67.9	0	0
1402	1175	0	1175	0	1175	0	0	137	137.176	50	2	49	0	1	1	0	0	1	0	0	4	0	4	5	0	0	1	2	1	0	0	0	4	103	25.6	111	0.8	80.8	67.19	0	0
1403	1197	0	1197	0	1197	0	0	142	141.76	63	2	60	0	1	0	0	0	0	0	0	3	0	1	3	0	0	1	1	1	0	0	0	4	106	24.5	85	1	59.6	62.34	1	0
1404	1208	0	1208	0	1208	0	0	140	140.096	54	1	68	1	1	0	0	0	0	0	0	4	0	2	4	0	0	1	2	1	0	0	0	5.1	105	22.5	106	0.6	149.5	62.86	0	0
1405	1229	0	1229	0	1229	0	0	142	141.744	27	2	45	0	1	0	0	0	0	0	0	2	0	1	6	0	0	1	2	1	0	0	0	4.4	104	25.7	84	1.5	44.3	68.97	0	0
1406	1227	0	1227	0	1227	0	0	137	136.904	50	2	51	0	1	0	0	0	1	0	0	2	0	3	5	0	0	1	1	1	0	0	0	4.5	102	26.5	94	0.6	112.7	56.67	0	0
1407	1168	0	1168	0	1168	0	0	143	143.128	48	1	67	0	1	1	0	0	0	0	0	1	0	2	4	0	0	1	2	1	0	0	0	4.9	106	25.3	108	1.1	76.1	66.67	0	0
1408	1222	0	1222	0	993	1	0	142	141.824	46	2	56	0	1	0	0	0	0	0	0	4	0	3	4	0	0	1	2	1	0	0	0	3.9	104	26.1	89	0.8	82.2			0
1409	1189	0	1189	0	1189	0	0	142	142.176	52	2	60	0	1	1	0	0	0	0	0	1	0	1	2	0	0	1	2	1	0	0	0	4.6	104	25	111	0.8	80.2	62.9	0	0
1410	1186	0	1186	0	1186	0	0	142	141.92	41	1	64	0	1	0	0	0	0	0	0	3	0	2	6	0	0	1	1	0	0	0	0	4.1	104	27	95	1	87.7	62.99	1	0
1411	1210	0	1210	0	1210	0	0	141	141.048	47	1	72	0	1	0	0	0	0	0	0	2	0	1	6	0	1	1	2	0	0	0	0	3.7	99	29.7	103	1.2	69.1	63.19	0	0
1412	1195	0	1195	0	1195	0	0	139	138.68	37	2	59	1	1	0	0	0	0	0	0	4	0	1	2	0	0	1	2	1	0	0	0	3.9	101	27.6	80	0.9	75	45.96	0	0
1413	1194	0	1194	0	11	1	0	139	138.696	48	2	46	0	1	0	0	0	0	0	0	2	0	3	3	0	0	1	1	1	0	0	0	5.1	109	21.1	81	1.7	34.1	58.62	0	0
1414	1202	0	1202	0	142	1	0	140	140.256	57	1	54	1	1	1	0	0	0	0	0	3	0	2	6	0	0	1	2	1	0	0	0	5	104	25.1	116	1.5	51.4	59.09	0	0
1415	1162	0	1162	0	1162	0	0	142	142.032	36	2	45	0	0	0	0	0	0	0	0	3	0	2	3	0	0	1	2	1	0	0	0	3.7	104	26.3	102	0.8	86.4	64.29	0	0
1416	1494	0	1494	0	1494	0	0	140	139.392	26	2	52	0	1	0	0	0	0	0	0	3	0	1	3	0	0	1	1	1	0	0	0	3.6	100	23.9	62	0.9	80.6	69.88	1	0
1417	1190	0	1190	0	1190	0	0	140	140.032	38	1	71	1	1	0	0	0	0	0	0	2	0	2	5	0	1	1	2	1	0	0	0	3.6	102	23.2	102	1.2	72.1	60.42	1	0
1418	1134	0	1134	0	1134	0	0	141	141.192	57	1	56	1	1	0	0	0	0	0	1	4	0	2	6	0	1	1	1	1	0	0	0	4.2	103	24.2	112	1.3	60.6	61.48	0	0
1419	1470	0	1470	0	1470	0	0	140	140.016	25	1	62	1	1	0	0	0	0	0	0	4	0	1	5	0	1	1	2	1	0	0	0	4.4	103	21.5	101	1.6	56.3	64.36	0	0
1420	1176	0	1176	0	1176	0	0	138	138.032	38	1	50	1	1	0	0	0	0	0	0	4	0	3	5	0	0	1	2	1	0	0	0	4.3	104	19.8	102	1.4	60.4	62.86	0	0
1421	1458	0	1458	0	1458	0	0	140	140.16	47	1	70	1	1	0	0	0	0	0	0	4	0	3	4	0	0	1	2	1	0	0	0	4.5	107	23.5	110	0.8	110.3	60.69	0	0
1422	1195	0	1195	0	78	1	0	137	140.76	56	1	84	0	1	1	0	0	0	0	0	1	0	1	3	0	0	1	2	1	0	0	0	5.2	111	18.7	335	1.1	73.7	63.3	0	0
1423	1122	0	1122	0	1122	0	0	140	139.984	51	1	60	1	1	0	0	0	0	0	0	2	0	2	3	0	0	1	1	1	0	0	0	4.3	105	23.3	99	0.6	151.2	57.39	0	0
1424	1155	0	1155	0	1155	0	0	141	140.744	53	2	54	0	1	0	0	0	0	0	0	3	0	1	0	0	0	1	2	1	0	0	0	4.3	106	22.6	84	1.2	50	69.37	1	0
1425	1139	0	1139	0	1139	0	0	137	137.912	29	2	67	0	0	1	0	0	1	0	0	1	0	1	4	0	0	1	2	1	0	0	0	4.7	105	20.1	157	1	69.8	57.14	0	0
1426	1167	0	1167	0	1167	0	0	139	139.096	40	1	64	0	1	0	0	0	0	0	0	2	0	2	5	0	0	1	2	1	0	0	0	4.8	103	21.9	106	1.2	71.4	64.5	1	0
1427	1125	0	1125	0	1125	0	0	141	141.224	41	1	86	1	1	0	0	0	0	0	0	3	0	1	0	0	0	1	1	1	0	0	0	3.8	106	23.2	114	1	87.7	59.75	0	0
1428	1155	0	1155	0	814	1	0	141	140.648	31	2	62	0	1	0	0	0	1	0	0	3	0	2	3	0	0	1	2	1	0	0	0	4.2	101	25.3	78	0.5	153.2	62.83	1	0
1429	1476	0	1476	0	1137	1	0	144	144.016	26	1	39	0	1	0	0	0	0	0	0	3	0	1	3	0	0	1	2	1	0	0	0	3.6	105	23.5	101	0.8	124.4	49.62	0	0
1430	1177	0	1177	0	1177	0	0	140	139.92	28	2	46	0	1	0	0	0	0	0	0	2	0	1	3	0	0	1	1	1	0	0	0	3.7	102	24.7	95	0.9	79.4	63.1	0	0
1431	1156	0	1156	0	1156	0	0	139	139.08	44	1	71	1	1	0	0	0	0	0	0	4	0	3	5	0	0	1	2	1	0	0	0	5	111	21	105	1.7	46.8		0	0
1432	1434	0	1434	0	1434	0	0	136	136.064	50	2	49	0	1	0	0	0	0	0	0	4	0	4	5	0	0	1	2	1	0	0	0	4.7	118	11.9	104			64.06	0	0
1433	1165	0	1165	0	1165	0	0	144	143.968	56	1	70	0	0	0	0	0	0	1	0	2	0	2	3	0	0	1	2	1	0	0	0	4.8	106	22.5	98	0.9	92.9	56.3	0	0
1434	1134	0	1134	0	1134	0	0	139	139.112	54	1	57	0	1	0	1	0	0	0	0	2	0	1	3	0	0	1	1	1	0	0	0	4.2	103	22.9	107	1.2	67.2	64.41	0	0
1435	1470	0	1470	0	1470	0	1	135	134.984	63	1	55	0	1	1	1	0	0	0	0	4	0	3	4	0	0	1	1	1	0	0	0	4.4	104	20.3	99	1	80.3	58.33	0
1436	1407	0	1407	0	1407	0	0	138	138.048	41	2	64	0	1	0	0	0	0	0	0	4	1	1	7	0	0	1	1	1	0	0	0	4.2	108	21.4	103			63.78	0	0
1437	1422	0	1422	0	1422	0	0	141	140.808	30	1	47	0	0	1	0	0	1	0	0	4	0	4	7	0	0	1	2	1	0	0	0	4.8	108	23.5	88			60	1	0
1438	1422	0	1422	0	936	1	0	137	136.776	27	2	44	0	1	0	0	0	0	0	0	2	0	1	3	0	0	1	1	1	0	0	0	4.7	103	22.9	86	1.3	52.3	55.26	0
1439	1162	0	1162	0	1162	0	0	143	142.808	50	1	61	0	1	0	0	0	0	0	0	1	0	2	4	0	0	1	2	1	0	0	0	5	106	25.7	88	1.4	57.1	47.86	0	0
1440	1077	0	1077	0	1077	0	0	142	141.744	39	2	58	0	1	1	0	0	0	0	0	4	0	2	4	0	0	1	2	1	0	0	0	4.1	106	21.9	84	0.6	118.5	70.43	0	0
1441	1158	0	1158	0	1158	0	0	140	139.856	39	1	54	1	1	1	0	0	0	0	0	4	0	4	3	0	0	1	2	1	0	0	0	5.3	108	20.3	91	0.9	100	64.52	0	0
1442	1119	0	1119	0	#NULL!	1	0	135	135.88	50	2	40	0	1	0	0	0	0	0	0	3	0	3	5	0	0	1	2	1	0	0	0	4.1	103	23.8	155	0.9	70.6	62.96	0	0
1443	1113	0	1113	0	1113	0	0	141	140.968	39	1	60	0	1	0	0	0	0	0	0	2	0	3	2	0	0	1	2	1	0	0	0	4.3	107	23.5	98	0.6	159.7	64.86	0	0
1444	1129	0	1129	0	1129	0	0	140	139.872	53	1	59	0	1	0	1	0	0	0	0	3	0	2	4	0	0	1	1	1	0	0	0	4.1	106	22.8	92	0.9	94		0	0
1445	1146	0	1146	0	1146	0	0	144	143.936	49	2	56	0	1	0	0	0	0	0	0	3	0	1	3	0	0	1	2	1	0	0	0	5.2	110	20.9	96	1.4	42.5	66.23	0	0
1446	1145	0	1145	0	813	1	0	140	140.16	31	1	55	0	1	0	0	0	0	0	0	2	0	3	4	0	0	1	2	1	0	0	0	4.5	108	22.1	110	1	92.8	60.87	0	0
1447	3	0	1464	0	1464	0	0	140	139.696	45	1	53	0	1	0	0	0	0	0	0	2	0	1	5	0	0	1	2	1	0	0	0	3.9	102	27.9	81	1.1	77.1	58.65	0	0
1448	1083	0	1083	0	1083	0	0	138	137.904	35	2	47	0	1	0	0	0	0	0	0	4	0	1	3	0	1	1	2	1	0	0	0	4.4	101	26.9	94	0.9	75.9	64.06	0	0
1449	1086	0	1086	0	1086	0	0	140	140.016	34	2	53	0	1	0	0	0	0	0	0	3	0	1	2	0	0	1	2	1	0	0	0	4.3	102	27.2	101	0.8	87.4	63.21	0	0
1450	1041	0	1041	0	1041	0	0	143	142.904	39	1	70	0	1	0	0	0	0	0	0	3	0	2	5	0	1	1	2	1	0	0	0	3.9	109	23.5	94	1	88.6	63.55	0	0
1451	1090	0	1090	0	1090	0	0	140	141.856	47	1	52	0	1	1	0	0	0	0	0	1	0	2	4	0	0	1	1	1	0	0	0	4.9	102	28.1	216	1.1	76.4	57.69	0	0
1452	1392	0	1392	0	1392	0	0	141	141.128	42	1	70	1	1	0	0	0	0	0	0	3	0	1	3	0	1	1	1	1	0	0	0	3.7	107	24	108	0.8	112.9	63.7	0	0
1453	1123	0	1123	0	1123	0	0	139	139.752	33	1	82	0	1	1	0	0	0	0	0	4	0	3	0	0	0	1	2	1	0	0	0	3.8	106	22.9	147	1.3	67.7	60.77		0
1454	1113	0	1113	0	1113	0	0	141	141.176	57	1	68	0	1	0	0	0	0	0	0	3	0	3	5	0	0	1	2	1	0	0	0	4.9	111	22.7	111	0.9	92.6	47.06	1	0
1455	1069	0	1069	0	1069	0	1	129	133.816	47	2	56	0	1	0	0	0	1	0	0	4	0	3	5	0	0	1	2	1	0	0	0	5.2	103	16.9	401	1.1	56.7	64.13	0	0
1456	1401	0	1401	0	1401	0	0	140	140.144	28	1	62	1	1	0	0	0	0	0	0	2	0	2	6	0	1	1	2	1	0	0	0	4.2	107	22.9	109	1.3	70	62.86	0	0
1457	1398	0	1398	0	1398	0	0	138	141.488	51	2	60	0	1	1	0	0	0	1	0	1	0	1	3	0	0	1	2	1	0	0	0	4.9	104	24.5	318	1	62.2	57.97	1	0
1458	1077	0	1077	0	1077	0	0	144	144.592	45	2	73	1	1	0	0	0	0	0	0	1	0	1	3	0	0	1	2	1	0	0	0	4.3	107	26.4	137	1.1	57.2	56	0	0
1459	1401	0	1401	0	1401	0	0	137	136.904	34	2	46	0	1	0	0	0	0	0	0	2	0	2	6	0	1	1	2	1	0	0	0	4	101	24.5	94	0.7	102	64.94	0	0
1460	1109	0	1109	0	1109	0	0	135	135.032	37	1	67	0	1	1	0	0	1	0	0	4	0	4	3	0	0	1	2	1	0	0	0	6.6	115	12	102	1.4	60.7	66.06	0	0
1461	1052	0	1052	0	1052	0	0	141	141.336	41	1		1	1	0	0	0	0	0	0	4	0	4	5	0	0	1	2	1	0	0	0	3.6	113	22	121	1.7	47.5	66.4	0	0
1462	802	0	802	0	8	1	0	141	141.8	44	2	54	1	1	0	0	0	0	0	0	4	0	3	5	0	0	1	1	1	0	0	0	3.4	107	28.7	150	0.7	96.8	72.16	1	0
1463	1106	0	1106	0	1106	0	0	139	139.352	61	1	70	1	1	1	1	0	0	0	0	1	0	1	3	0	0	1	2	1	0	0	0	4.2	107	24.6	122	1.1	72.4	35	1	0
1464	1041	0	1041	0	1041	0	0	143	142.92	66	1	75	1	1	0	1	0	0	0	0	1	0	2	6	0	0	1	2	1	0	0	0	4.3	107	24.1	95	0.9	89.9	62.6	0	0
1465	1056	0	1056	0	1056	0	0	139	139.144	49	1	66	1	1	1	1	0	0	0	0	3	0	1	2	0	0	1	1	1	0	0	0	3.9	102	24.8	109	1.3	62.5	67.07	0	0
1466	1088	0	1088	0	197	1	0	140	140.064	49	1	69	0	1	0	0	0	0	0	0	2	0	2	6	0	0	1	2	1	0	0	0	4	105	24.8	104	1.2	68.5	59.59	0	0
1467	1089	0	1089	0	1089	0	0	142	142.176	53	1	75	1	1	0	0	0	0	0	0	3	0	2	4	0	0	1	1	1	0	0	0	4.2	107	25.7	111	0.9	94	67.97	0	0
1468	1037	0	1037	0	1037	0	0	143	142.84	57	1	68	0	1	0	0	0	0	0	0	4	0	2	6	0	0	1	1	1	0	0	0	5	108	25.6	90	1.3	60.6	65.56	1	0
1469	1102	0	1102	0	1102	0	0	141	140.792	39	2	41	0	1	1	0	0	0	0	0	3	0	2	4	0	0	1	2	1	0	0	0	4.1	106	25	87	0.3	263.7	60	0	0
1470	1049	0	1049	0	1049	0	0	142	141.616	47	1		1	1	0	0	0	0	0	0	4	0	4	4	0	0	1	2	1	0	0	0	6.1	114	19.4	76	1	85.3	61.38		0
1471	1101	0	1101	0	1086	1	0	144	143.984	46	2	67	0	0	0	0	0	0	0	0	4	0	1	3	0	0	1	1	1	0	0	0	4.4	106	26.9	99	0.9	71.8	59.81	0	0
1472	1049	0	1049	0	1049	0	0	138	137.984	59	1	54	1	1	0	0	0	0	0	0	3	1	2	7	0	1	1	2	1	0	0	0	5.6	101	27.2	99			60.91	0	0
1473	1033	0	1033	0	1033	0	0	138	137.792	55	2	62	0	1	1	0	0	0	0	0	1	0	1	3	0	0	1	1	1	0	0	0	3.5	101	26	87	1.2	49.7	69	1	0
1474	1079	0	1079	0	1079	0	0	140	139.92	36	2		0	0	1	0	0	0	0	0	4	0	4	4	0	0	1	2	1	0	0	0	4.6	105	23.4	95	2	30	68.32	0	0
1475	1081	0	1081	0	61	1	0	137	138.808	40	1	77	0	0	0	0	0	0	0	0	2	0	1	6	0	0	1	2	1	0	0	0	4.9	102	20.8	213	2.5	30.6	60.31	0	0
1476	1071	0	1071	0	1071	0	0	142	142.08	30	1	71	0	1	0	0	0	0	0	0	3	0	3	4	0	0	1	1	1	0	0	0	4.3	110	20.1	105	1	93.4	63.22	0	0
1477	1047	0	1047	0	1047	0	0	141	141.08	28	1	86	0	1	0	0	0	0	0	0	2	0	1	2	0	1	1	2	1	0	0	0	4.4	110	21.1	105	1.5	59.3	54.29	0	0
1478	1001	0	1001	0	1001	0	0	139	139.032	40	1	59	1	1	0	0	0	0	0	0	4	0	1	6	0	0	1	2	1	0	0	0	4.1	102	24	102	1.4	59.8	55.93	1	0
1479	965	0	965	0	965	0	0	142	141.616	63	2	45	0	1	0	0	0	1	0	0	2	0	1	1	0	0	1	1	1	0	0	0	4.7	107	24.1	76	0.9	67.3	48.59	0	0
1480	1008	0	1008	0	1008	0	0	138	138.368	38	2	50	0	1	0	0	0	0	0	0	2	0	1	3	0	1	1	2	1	0	0	0	4	105	23.9	123	0.8	85.5	63.74	0	0
1481	1025	0	1025	0	1025	0	0	143	144.504	54	1	69	1	1	1	0	0	0	0	0	1	0	1	0	0	0	1	1	1	0	0	0	4.4	103	29	194	1.4	56.2	63.89	0	0
1482	1021	0	1021	0	1021	0	0	138	137.856	36	1	56	1	1	0	0	0	0	0	0	4	0	2	4	0	0	1	1	1	0	0	0	4.3	99	29.4	91	0.8	116.4		0	0
1483	1076	0	1076	0	1076	0	0	139	139.432	40	1	77	1	0	0	0	0	0	0	0	3	0	2	5	0	0	1	2	1	0	0	0	4	102	29.1	127	1.2	71.4	55.56	0	0
1484	1029	0	1029	0	1029	0	0	137	138.904	29	2	52	0	1	0	0	0	0	0	0	4	0	2	6	0	0	1	2	1	0	0	0	2.8	100	23.9	219	1.2	56.5	63.22	0	0
1485	1067	0	1067	0	1067	0	0	140	140.464	45	1	56	1	0	1	0	0	0	0	0	3	0	1	3	0	0	1	2	1	0	0	0	4.2	104	22.9	129	0.8	111.3	65.15	0	0
1486	1021	0	1021	0	1021	0	0	141	141.32	70	2	71	0	1	0	0	0	0	0	0	2	0	1	2	0	0	1	2	1	0	0	0	3.6	102	28	120	0.9	65.9	61.86	0	0
1487	1080	0	1080	0	1080	0	0	143	143.048	54	1	68	0	1	1	0	0	0	0	0	1	0	2	6	0	0	1	1	1	1	0	0	4	108	24.9	103	1	82.9	57.01	0	0
1488	990	0	990	0	990	0	0	140	140.272	27	2	50	0	1	1	0	0	0	0	0	1	0	1	2	0	0	1	1	1	0	0	0	3.7	101	28.7	117	1.4	48	63.06	0	0
1489	1043	0	1043	0	1043	0	0	142	142.192	54	2	59	0	1	0	0	0	1	0	0	3	0	1	2	0	0	1	2	1	0	0	0	3.9	107	24.8	112	0.9	69.5	59.7	0	0
1490	1006	0	1006	0	1006	0	0	140	139.84	20	2	50	0	0	0	0	0	0	0	0	3	0	1	3	0	0	1	2	1	0	0	0	3.9	104	26	90	0.7	113.6		0	0
1491	1042	0	1042	0	1042	0	0	141	140.744	31	2	51	0	1	0	0	0	0	0	0	4	0	1	2	0	0	1	2	1	0	0	0	3.9	100	28.7	84	0.8	89.1	59.55	0	0
1492	1030	0	1030	0	1030	0	0	140	140.624	55	2	74	0	1	0	0	0	0	0	0	1	0	3	4	0	0	1	1	1	0	0	0	4.1	105	23.1	139	2	27.5			0
1493	982	0	982	0	982	0	0	139	138.936	34	1	70	0	0	1	0	0	0	0	0	2	0	3	4	0	0	1	2	1	1	0	0	4.2	105	24.2	96	1.6	52.9	60.44	0	0
1494	943	0	943	0	496	1	0	139	139.96	51	1	82	0	1	0	0	0	0	0	0	1	0	2	7	0	0	1	1	1	0	0	0	4.7	104	27.6	160	0.6	151.2	57.14	0	0
1495	496	0	496	0	496	0	0	141	143.288	58	2	58	0	1	1	0	0	1	0	0	3	0	1	3	0	0	1	1	1	0	0	0	3.9	102	29.1	243	1.2	49.1	67.82	0	0
1496	1020	0	1020	0	1020	0	0	142	141.664	63	1	68	1	1	1	0	0	0	0	0	1	0	2	5	0	0	1	1	1	0	0	0	5	114	20.2	79	0.9	90.7	56.19	0	0
1497	1015	0	1015	0	1015	0	1	135	134.616	64	2	53	0	1	0	0	0	0	0	0	4	0	1	2	0	0	1	2	1	0	0	0	4.6	102	22.6	76	1.9	28.3		0	0
1498	988	0	988	0	988	0	0	136	135.68	34	1	59	0	0	0	0	0	0	0	0	2	0	1	2	0	0	1	1	1	0	0	0	3.8	102	22.8	80	1.3	67.3	54.32	0	0
1499	1034	0	1034	0	1034	0	0	142	141.92	37	1	77	1	1	0	0	0	0	0	0	4	0	3	5	0	0	1	2	1	0	0	0	4.2	109	24.9	95	2.5	31.1			0
1500	1038	0	1038	0	507	1	0	141	141.176	38	1	68	1	1	0	0	0	0	0	0	2	0	1	0	0	0	1	1	1	0	0	0	4.9	100	29.9	111	1.1	79.8		0	0
1501	941	0	941	0	117	1	0	143	142.696	55	1	71	1	1	0	0	0	0	0	0	1	0	2	4	0	0	1	2	1	0	0	0	4.4	110	24.2	81	1.4	56	66.67	0	0
1502	1008	0	1008	0	1008	0	0	142	141.792	36	2	56	0	1	1	0	0	0	0	0	4	0	1	5	0	0	1	2	1	0	0	0	4.2	105	27.8	87	0.8	86.4	62.39	0	0
1503	956	0	956	0	476	1	0	142	141.984	29	1	67	0	1	0	0	0	0	0	0	3	0	1	2	0	0	1	2	1	0	0	0	4.4	109	24	99	1.2	76.2	59.78	0	0
1504	1028	0	810	1	838	0	0	140	140.176	37	1	68	1	1	0	0	0	0	0	0	4	0	1	2	0	0	1	1	1	0	0	0	3.8	109	21.3	111	1.5	56.1	63.48	0	0
1505	1013	0	1013	0	1013	0	0	144	143.904	37	1		1	0	1	0	0	0	0	0	4	0	4	5	0	0	1	2	1	0	0	0	5.1	112	24.8	94	1.6	52	57.79	0	0
1506	1293	0	1293	0	1293	0	0	138	138.8	55	2	65	0	1	1	0	0	1	0	0	1	0	1	3	0	0	1	1	1	0	0	0	4.5	100	27.4	150	1.1	54.9	65	0	0
1507	967	0	967	0	967	0	0	141	140.968	49	2	69	0	1	1	0	0	0	1	0	1	0	2	4	0	0	1	2	1	0	0	0	4.5	107	25.5	98	0.9	70.8	60.74	0	0
1508	977	0	977	0	683	1	0	140	140.512	37	2	54	0	1	0	0	0	0	0	0	2	0	1	3	0	0	1	2	1	0	0	0	4.4	105	24.4	132	1.1	59.5	52.17	0	0
1509	949	0	949	0	949	0	0	139	139.128	57	2	61	0	1	0	0	0	1	0	0	3	0	1	2	0	0	1	2	1	0	0	0	4.2	104	22.6	108	1.2	49.3	63.01	1	0
1510	988	0	988	0	988	0	0	140	139.984	48	1	60	0	1	0	0	0	0	0	0	3	0	2	2	0	0	1	2	1	0	0	0	3.8	101	26.9	99	0.7	128.1	54.62	0	0
1511	980	0	980	0	980	0	0	134	135.648	59	1	62	0	1	0	0	0	0	0	0	1	0	2	5	0	1	1	2	1	0	0	0	4.3	102	22.2	203	1.1	72.9	59.22	0	0
1512	1012	0	1012	0	1012	0	0	141	140.664	49	1	65	1	1	1	0	0	0	0	0	3	0	1	3	0	1	1	1	1	0	0	0	4.3	103	27.1	79	1.4	57.3	59.55	0	0
1513	1022	0	1022	0	1022	0	0	141	140.84	35	1	84	0	1	0	0	0	0	1	0	3	0	1	3	0	1	1	2	1	0	0	0	4.1	104	24.7	90	1.1	81.1	56.03	1	0
1514	945	0	945	0	945	0	0	137	137.176	47	1	84	1	1	0	0	0	0	0	0	3	0	2	6	0	1	1	2	1	0	0	0	5.1	107	22.2	111	1.2	69.1	57.14	0	0
1515	947	0	947	0	947	0	0	141	140.952	49	1	75	1	1	0	0	0	0	0	0	3	0	2	5	0	0	1	1	1	0	0	0	3.9	105	25.7	97	1.2	68.5	58.43	0	0
1516	976	0	976	0	976	0	0	140	139.632	68	1	64	1	1	0	0	0	0	0	0	3	0	1	3	0	0	1	2	1	0	0	0	4.5	99	29.8	77	1.1	70.9	59.29	0
1517	1284	0	1284	0	1284	0	0	142	142.064	54	1	60	1	1	0	0	0	0	0	0	2	1	2	7	0	0	1	2	1	0	0	0	4.6	113	18.6	104			67.19	0	0
1518	1016	0	1016	0	1016	0	0	141	140.904	36	1	79	1	1	0	0	0	0	0	0	3	0	1	3	0	1	1	2	1	0	0	0	4.5	103	26.3	94	1.1	80.6	70	0	0
1519	980	0	980	0	980	0	0	140	140.176	30	1	77	1	1	1	0	0	0	0	0	1	0	1	0	0	0	1	2	1	0	0	0	5.1	101	29.5	111	1	93.4	62.18	0	0
1520	962	0	962	0	962	0	0	138	139.584	64	1	78	1	1	1	1	0	0	0	0	1	0	2	6	0	0	1	2	1	0	0	0	4.3	102	24.6	199	1.4	54.3	59.69	0	0
1521	995	0	995	0	995	0	0	140	139.856	42	2	54	0	1	0	0	0	0	0	0	3	0	1	0	0	0	1	1	1	0	0	0	4.2	104	26.4	91	0.5	144	61.46	0	0
1522	993	0	993	0	993	0	0	139	139.032	42	2	55	1	1	0	1	0	0	0	0	2	0	1	3	0	0	1	2	1	0	0	0	4.5	104	25.6	102	0.9	73.1	72.29	0	0
1523	982	0	982	0	230	1	0	141	141.048	56	1	73	1	1	0	0	0	0	0	0	3	0	1	3	0	0	1	1	1	0	0	0	4.2	102	29.1	103	0.9	92.9	63.77	0	0
1524	1008	0	1008	0	1008	0	0	138	137.792	28	2	56	1	0	0	0	0	0	0	0	4	0	1	3	0	1	1	1	1	0	0	0	3.7	106	23.6	87	1.1	63	65.62	0	0
1525	939	0	939	0	939	0	0	142	142.432	54	2	53	0	1	0	0	0	0	0	0	3	0	2	5	0	0	1	2	1	0	0	0	4.9	104	28.7	127	1.1	55.1	60.94	0	0
1526	964	0	964	0	964	0	0	142	142.016	39	1	80	0	1	0	0	0	0	0	0	2	0	3	0	0	0	1	2	1	0	0	0	6.1	109	25.2	101	0.7	133.7	65.59	0	0
1527	976	0	976	0	976	0	0	139	138.904	47	2	56	0	1	0	0	0	0	0	0	3	0	3	4	0	0	1	2	1	0	0	0	3.9	109	23.2	94	1.5	39.6	58.43	0	0
1528	963	0	963	0	211	1	0	138	141.456	53	1	83	0	1	1	0	0	0	0	0	1	0	3	3	0	0	1	2	1	0	0	0	3.7	109	23.2	316	1.2	67.4	63.46		0
1529	982	0	982	0	982	0	0	143	142.792	31	1	80	1	1	0	0	0	0	0	0	2	0	3	5	0	0	1	2	1	0	0	0	4.3	108	23.8	87	1.1	83.1	56.41	0	0
1530	974	0	974	0	368	1	0	140	140.752	36	1	63	1	1	0	0	0	0	0	0	4	0	1	3	0	0	1	2	1	0	0	0	4	105	24.8	147	1.3	66.5	66.67	0	0
1531	950	0	950	0	950	0	0	141	141.176	25	1	58	0	0	0	0	0	0	0	0	3	0	3	4	0	0	1	2	1	0	0	0	5	107	24.5	111	1.6	56.3	54.22	0	0
1532	955	0	955	0	955	0	0	141	140.888	56	1	73	0	0	0	0	0	0	0	0	3	0	2	5	0	0	1	2	1	0	0	0	3.9	108	23	93	1	82.3	58.33	0	0
1533	989	0	989	0	989	0	0	137	140.344	61	2	55	0	1	1	1	0	0	0	0	1	0	1	3	0	0	1	1	1	0	0	0	4.5	102	23.8	309	0.8	77.6	58.57	0
1534	942	0	942	0	942	0	0	137	137.048	39	2	57	0	1	0	0	0	0	0	0	4	0	4	0	0	0	1	1	1	0	0	0	3.7	104	23.4	103	0.8	85	57.66	0	0
1535	910	0	910	0	910	0	0	141	141.336	47	1	71	1	1	1	0	0	0	0	0	1	0	2	4	0	0	1	2	1	0	0	0	3.8	101	28.4	121	1.3	63	64.14	0	0
1536	913	0	913	0	913	0	0	137	136.888	42	1	59	1	1	0	0	0	0	0	0	2	0	1	3	0	0	1	1	1	1	0	0	4.3	103	23.6	93	1.6	50.7	61.4	0	0
1537	946	0	946	0	946	0	0	142	142.176	55	1	65	1	1	0	0	0	0	1	0	4	0	4	3	0	0	1	1	1	0	0	0	4	105	27.8	111	1	82.6	64.15	1	0
1538	957	0	957	0	957	0	0	144	143.984	40	1	54	0	1	0	0	0	1	1	0	4	0	3	4	0	0	1	2	1	0	0	0	4.9	112	24.5	99	1.8	44.7	68.13	0	0
1539	932	0	932	0	932	0	0	136	136.08	41	1	54	1	1	0	0	0	1	0	0	4	0	3	4	0	0	1	2	1	0	0	0	5.2	104	18.8	105	1	87.7	57.74	0
1540	932	0	932	0	527	1	0	142	141.792	39	1		1	1	0	0	0	0	0	0	2	0	3	5	0	0	1	1	1	1	0	0	4.3	108	24.6	87	1.1	79.3	55.15	0	0
1541	952	0	952	0	952	0	0	140	140.288	38	1		1	1	0	0	0	1	0	0	4	0	4	3	0	0	1	2	1	0	0	0	3.3	104	25.6	118	0.7	134.4			0
1542	819	0	780	1	787	1	0	140	140.112	42	1	56	1	1	0	0	0	0	0	0	4	0	2	3	0	0	1	2	1	0	0	0	3.6	104	23.4	107	1	87.2	66.45	0	0
1543	902	0	902	0	902	0	0	139	139.096	51	1	63.5	1	1	0	0	0	0	0	0	4	0	3	3	0	0	1	2	1	0	0	0	5.5	117	15	106	3.6	19.1	57.45	0	0
1544	905	0	905	0	905	0	0	139	140.44	51	1	66	1	1	0	1	0	1	0	0	3	0	2	2	0	1	1	2	1	0	0	0	4.1	102	23.7	190	1.4	56.9	59.14	0	0
1545	1191	0	1191	0	1191	0	0	140	140.064	30	1	53	0	1	0	0	0	0	0	0	3	1	2	7	0	0	1	1	1	0	0	0	4.1	106	24.8	104			67.61	0	0
1546	888	0	888	0	888	0	0	141	141	35	2		0	1	1	0	0	0	0	0	4	0	3	4	0	0	1	2	1	0	0	0	5.8	107	23.5	100	0.9	75.9		0	0
1547	430	0	430	0	8	1	0	140	139.984	28	2	66	0	0	0	0	0	0	0	0	4	0	2	6	0	0	1	2	1	0	0	0	4	107	23.4	99	0.9	79.4	56.06	0	0
1548	939	0	939	0	939	0	0	140	139.744	30	2	69	0	1	0	0	0	0	0	0	4	0	1	2	0	0	1	1	1	0	0	0	4.5	103	26.7	84	1.1	62.1	63.89	0	0
1549	912	0	912	0	912	0	0	138	140.192	50	2	42	0	1	1	0	0	1	0	0	1	0	1	0	0	0	1	2	1	0	0	0	4.3	95	32.2	237	0.9	70.6	65.43	0	0
1550	892	0	892	0	715	1	0	137	136.856	35	1	64	1	1	0	0	0	0	0	0	3	0	1	4	0	0	1	1	1	0	0	0	3.6	99	25.9	91	0.9	102.2	58.12	1	0
1551	1197	0	1197	0	1197	0	0	142	141.952	48	2	53	0	1	0	0	0	0	0	0	4	0	3	0	0	0	1	2	1	0	0	0	4.3	105	23.8	97	1.5	39.5	61.54		1
1552	929	0	929	0	929	0	0	138	138.496	38	2	62	0	1	0	0	0	0	0	0	4	0	1	0	0	0	1	2	1	0	0	0	4	101	26.7	131	1.3	48.8	60.16	0	0
1553	922	0	922	0	922	0	0	144	143.968	54	1	58	0	1	0	1	0	0	0	0	3	0	2	6	0	0	1	1	1	0	0	0	5.6	105	27.8	98	1	82.9	57.97	0	0
1554	912	0	912	0	912	0	0	141	141	48	2	60	0	1	0	0	0	0	0	0	3	0	3	5	0	0	1	2	1	0	0	0	5.2	104	26.9	100	0.8	81.5	46.37	1	0
1555	928	0	928	0	88	1	0	139	138.904	23	1	69	0	1	0	0	0	0	0	0	2	0	2	6	0	0	1	2	1	0	0	0	4.7	106	24.6	94	1.4	66.9	55.8	0	0
1556	883	0	883	0	883	0	0	138	137.84	65	2	62	0	1	0	0	0	0	0	0	3	0	1	2	0	0	1	2	1	0	0	0	4.3	103	23.6	90	0.7	89.4	72.13	1	0
1557	875	0	875	0	875	0	0	136	135.76	35	2		0	1	0	0	0	0	0	0	4	0	4	1	0	0	1	2	1	0	0	0	5.3	108	17.6	85	1.2	54.4		0	0
1558	924	0	924	0	924	0	0	142	142.048	46	2	56	0	1	1	0	0	0	0	0	4	0	4	3	0	1	1	1	1	0	0	0	4.7	106	24	103	1.2	51.5	66.07	0	0
1559	1209	0	1209	0	36	1	0	138	137.968	47	1	55	0	1	1	0	0	0	0	0	2	1	2	7	0	0	1	2	1	0	0	0	4.4	105	23.2	98			61.7	1	0
1560	887	0	887	0	887	0	0	140	140.032	32	1	63	1	1	0	0	0	0	1	0	4	0	1	0	0	0	1	2	1	0	0	0	3.7	105	25.8	102	1.3	68.1	61.11	0	0
1561	887	0	887	0	887	0	0	141	141.112	54	2	57	0	1	0	0	0	0	0	0	4	0	2	6	0	0	1	2	1	0	0	0	4	108	21.4	107	0.7	92.8	54.33	0	0
1562	878	0	878	0	878	0	0	138	137.904	36	1		0	1	1	0	0	0	0	0	4	0	3	3	0	0	1	1	1	0	0	0	4.8	113	19.7	94	1.1	80.6	64.23		0
1563	889	0	889	0	889	0	0	139	139.32	49	1	77	1	1	0	1	0	0	0	0	1	0	1	3	0	0	1	2	1	0	0	0	3.9	102	26.3	120	1.4	57.3	64	0	0
1564	890	0	890	0	890	0	0	141	140.728	56	2	54	0	1	1	0	0	0	0	0	4	0	4	2	0	0	1	1	1	0	0	0	3.7	103	26	83	0.9	69	56.44	0	0
1565	852	0	852	0	852	0	0	136	137.024	43	1	67	0	1	0	0	0	0	0	0	3	0	2	5	0	0	1	1	1	0	0	0	3.8	102	22.4	164	1	86.8	69.23	0	0
1566	905	0	905	0	905	0	0	139	138.808	48	2	45	0	1	0	0	0	0	0	0	3	0	1	4	0	0	1	2	1	0	0	0	4.2	105	25.3	88	0.9	71.1	65.17	0	0
1567	876	0	876	0	187	1	1	127	128.008	56	1	52	1	0	1	1	0	0	1	0	1	0	2	5	0	0	1	2	1	0	0	0	4.5	99	18.6	163	2	37	46.32	1	1
1568	834	0	780	1	676	1	0	142	142.24	55	1	71	1	1	1	0	0	0	0	1	1	0	1	3	0	0	1	1	1	0	0	0	4.2	104	27.8	115	1.2	66.9	66.67	0	0
1569	895	0	895	0	895	0	0	139	139.384	52	1	76	1	1	0	0	0	0	0	0	3	0	2	2	0	0	1	1	1	0	0	0	4	102	27.1	124	0.9	94.3	55.91	0	0
1570	897	0	897	0	897	0	0	137	136.76	36	2	49	0	1	0	0	0	0	0	0	2	0	1	5	0	0	1	2	1	0	0	0	4.3	102	26.6	85	0.7	100.8	59.72	0	0
1571	1209	0	1209	0	1209	0	0	138	138.288	64	1	60	0	1	0	0	0	0	0	0	3	1	1	7	0	1	1	2	1	0	0	0	4.7	107	20.1	118			57.64	0	0
1572	883	0	883	0	883	0	0	139	139.192	45	1	63	1	1	0	0	0	0	0	0	4	0	4	4	0	0	1	1	1	0	0	0	4.5	103	27.4	112	1.9	41	59.57	0	0
1573	887	0	887	0	887	0	0	140	140.528	55	1	73	0	1	0	0	0	0	0	0	4	0	4	4	0	1	1	1	1	0	0	0	4.3	103	28.9	133	1	82.6	64.34	0	0
1574	870	0	870	0	870	0	0	139	139.048	49	1	79	0	1	1	0	0	0	0	0	4	0	4	3	0	0	1	2	1	0	0	0	5	103	25.6	103	1.3	62.5	60.22	0	0
1575	861	0	861	0	861	0	0	139	139.048	33	2	53	0	1	1	0	0	0	0	0	4	0	4	7	0	0	1	2	1	0	0	0	4.9	106	24.2	103	0.9	76.8	59.17	0	0
1576	877	0	877	0	877	0	0	142	142.096	40	1	65	0	1	0	0	0	0	0	0	2	0	3	7	0	0	1	2	1	0	0	0	4.8	104	28	106	1.2	71.4	62.59	0	0
1577	825	0	825	0	825	0	0	143	142.84	39	1		1	0	0	0	0	0	0	0	4	0	4	7	0	0	1	2	1	0	0	0	3.6	108	24.4	90	0.6	159.7	61.82	0	0
1578	877	0	877	0	877	0	0	140	139.888	27	1	53	0	1	0	0	0	0	0	0	3	0	1	7	0	1	1	2	1	0	0	0	4.4	104	24.6	93	1.2	77.3	60.12	0	0
1579	196	1	196	0	196	0	0	141	140.968	34	2	46	0	1	0	0	0	0	0	0	3	0	1	7	0	0	1	1	1	0	0	0	4.5	106	21.9	98	1.4	45.8	42.4	0	0
1580	199	1	297	0	297	0	0	142	142.336	57	1	65	0	1	1	0	0	0	0	0	1	0	4	7	0	0	1	1	1	0	0	0	4.6	105	26.6	121	0.9	92.6	64.79	0	1
1581	1179	0	1179	0	1179	0	0	139	139.272	58	1	65	0	1	0	0	0	0	0	0	3	0	1	3	0	1	1	1	1	0	0	0	4.5	103	24.8	117	1.3	60.4	54.61	0	0
1582	839	0	839	0	411	1	0	140	140.272	37	2	54	0	1	0	0	0	0	0	0	4	0	1	4	0	0	1	2	1	0	0	0	4.1	106	24.7	117	0.8	85.9	59.44	0	0
1583	1173	0	1173	0	1173	0	0	141	141.208	48	1	62	0	1	0	0	0	0	0	0	2	0	1	3	0	0	1	1	1	0	0	0	3.7	104	25.9	113	0.9	95.9	65.26	0	0
1584	813	0	813	0	813	0	0	137	139.752	54	1	70	1	1	1	0	0	0	0	0	1	0	2	6	0	0	1	2	1	0	0	0	4.8	102	25.2	272	1.1	74.3	66.25	0	0
1585	769	0	769	0	769	0	0	138	137.872	38	2		0	1	0	0	0	0	0	0	4	0	3	6	0	0	1	2	1	0	0	0	3.7	103	23.4	92	1	66.1	70.24	0	0
1586	790	0	790	0	101	1	0	142	141.984	32	1	61	0	1	0	0	0	0	0	0	2	0	1	2	0	0	1	2	1	0	0	0	3.7	111	18.4	99	1.2	74.7	60.16	0	0
1587	867	0	867	0	867	0	0	137	137.432	29	1	87	0	1	0	0	0	0	0	0	2	0	1	3	0	0	1	2	1	0	0	0	4.2	108	23.4	127	2.7	29.9	55.42	0	0
1588	828	0	828	0	828	0	0	138	139.04	59	2	54	0	1	1	0	0	0	0	0	4	0	4	2	0	0	1	1	1	0	0	0	4	101	27.7	165	1.5	37.8	65.87	0	0
1589	862	0	862	0	862	0	0	145	144.472	60	1	56	1	1	0	0	0	0	0	0	2	0	2	3	0	0	1	2	1	0	0	1	4.7	108	25.4	67	1	81.1	62.99	0	0
1590	822	0	822	0	822	0	0	140	139.888	32	2	65	0	1	0	0	0	0	0	0	4	0	1	3	0	0	1	2	1	0	0	0	4.2	106	23.8	93	0.8	88.5	60	1	0
1591	802	0	802	0	802	0	0	139	138.824	53	1	71	0	1	1	0	0	0	0	0	1	0	1	2	0	0	1	1	1	0	0	0	4.3	105	26.3	89	1.3	61.5	61.83	0	0
1592	821	0	821	0	821	0	0	140	139.056	71	1	61	0	1	1	0	0	0	0	0	1	0	2	6	0	0	1	2	1	0	0	0	4.8	111	19.4	41	0.7	118.3	66.67	0	0
1593	837	0	837	0	837	0	0	139	138.76	49	2	53	0	1	0	0	0	0	0	0	2	0	1	3	0	0	1	2	1	0	0	0	3.9	103	25.2	85	1	62.7	64.84	0	0
1594	834	0	834	0	834	0	0	139	138.888	33	2	49	0	1	0	0	0	0	0	0	4	0	1	3	0	0	1	2	1	0	0	0	4.7	108	22.9	93	0.8	87.9	57.27	0	0
1595	781	0	781	0	781	0	0	136	136.96	43	1	62	0	1	0	0	0	0	0	0	4	0	1	4	0	0	1	2	1	0	0	0	5.1	103	20.6	160	1.3	64.1	67.19	0	0
1596	781	0	781	0	781	0	0	141	141.224	39	1	73	0	1	0	0	0	0	0	0	4	0	1	2	0	0	1	2	1	0	0	0	4.1	107	24.1	114	1.1	79.3	61.61	0	0
1597	766	0	766	0	766	0	0	142	142.112	52	1	59	0	1	0	0	0	0	0	0	3	0	2	5	0	1	1	2	1	0	0	0	4.5	106	28.3	107	0.7	126.1	69.01	0	0
1598	795	0	795	0	795	0	0	142	144.256	64	1	64	0	1	1	1	0	0	0	0	1	0	2	4	0	1	1	2	1	0	0	0	5.7	120	20	241	1.3	59.2	59.32		0
1599	778	0	778	0	778	0	0	141	141	45	1	71	1	1	0	0	0	0	0	0	2	0	2	5	0	0	1	2	1	0	0	0	4.8	103	29.4	100	0.9	97.1	74.32	0	0
1600	778	0	778	0	778	0	0	141	140.648	56	1	73	1	1	0	0	0	0	0	0	3	0	3	0	0	0	1	2	1	0	0	0	5.3	108	20.3	78	1.3	60.8		0	0
1601	792	0	792	0	792	0	0	141	140.872	36	1	84	0	1	0	0	0	0	0	0	4	0	4	7	0	0	1	2	1	0	0	0	4.7	105	26.5	92	2	40.4	66.67	0	0
1602	784	0	784	0	10	1	0	143	142.344	51	2	52	0	1	0	0	0	0	0	0	3	0	1	2	0	0	1	2	1	0	0	0	3.8	106	23.5	59	1.5	39	63.64	1	0
1603	743	0	743	0	743	0	0	141	141.176	55	2	58	0	1	0	0	0	0	0	0	4	0	1	3	0	0	1	2	1	0	0	0	4	102	24.6	111	0.9	69.2	64.71	0	0
1604	810	0	810	0	810	0	0	143	142.632	20	1	67	0	1	0	0	0	0	0	0	3	0	1	2	0	1	1	2	1	0	0	0	4.3	110	24.5	77	1	101.4	56.52	1	0
1605	821	0	821	0	821	0	0	140	139.44	57	1	69	0	1	1	0	0	0	0	0	1	0	2	5	0	1	1	2	1	0	0	0	4.7	105	24.8	65	1.3	60.6	64.44	0	0
1606	718	0	718	0	718	0	0	139	138.648	24	2	51	0	1	0	0	0	0	0	0	3	0	1	2	0	0	1	2	1	0	0	0	4	104	23.2	78	0.7	109.4	53.85	0	0
1607	772	0	772	0	772	0	0	138	138	34	2	65	0	1	0	0	0	0	0	0	2	0	1	3	0	0	1	2	1	0	0	0	4.4	105	23.6	100	1.4	45.8	59.71	0	0
1608	808	0	808	0	808	0	0	138	138.096	38	2	67	1	1	1	0	0	1	0	0	2	0	2	5	0	0	1	2	1	0	0	0	3	100	20.3	106	1.2	53.5	62.28	0	0
1609	339	0	339	0	339	0	0	142	142.08	57	2	67	0	1	0	0	0	0	0	0	4	0	3	5	0	0	1	2	1	0	0	0	4.3	110	22.9	105	0.9	68.7	39.02	0	0
1610	791	0	791	0	791	0	0	140	139.728	30	2	47	0	1	0	0	0	0	0	0	2	0	3	3	0	0	1	1	1	0	0	0	4	108	25.4	83	0.5	154.2	59.74		0
1611	807	0	807	0	807	0	0	139	139.08	44	2	47	0	1	1	0	0	0	0	0	2	0	3	6	0	0	1	2	1	0	0	0	4.7	108	21.6	105	0.8	83	60	1	0
1612	811	0	811	0	811	0	0	137	136.856	42	1	67	1	1	0	0	0	0	0	0	3	0	2	2	0	0	1	2	1	0	0	0	4.2	108	18.1	91	0.9	98.5	62.22	0	0
1613	765	0	765	0	765	0	0	141	140.728	32	1	77	0	1	0	0	0	0	0	0	4	0	1	2	0	0	1	2	1	0	0	0	4.8	108	21.7	83	2.2	37.1	58.67	0	0
1614	1062	0	1062	0	1062	0	0	137	137.288	30	1	64	0	1	1	0	0	0	0	0	3	0	1	2	0	0	1	1	1	0	0	0	3.4	104	28.8	118	1.9	44.5	58.06	0	0
1615	784	0	784	0	784	0	0	141	141.16	57	2	57	0	1	1	0	0	0	0	0	1	0	1	3	0	1	1	2	1	0	0	0	5.3	103	27.3	110	1	60.8	56.1	0	0
1616	717	0	717	0	717	0	0	139	139.992	52	2	66	0	1	0	0	0	0	0	0	4	0	1	4	0	0	1	2	1	0	0	0	5.3	106	23.9	162	0.8	80.2	63.64	0	0
1617	788	0	788	0	788	0	0	140	140	58	1	70	0	1	1	0	0	0	0	0	3	0	3	4	0	0	1	2	1	0	0	0	5	113	19.2	100	1.5	51.2	61.98	1	0
1618	795	0	795	0	795	0	0	137	136.92	66	1	70	1	1	1	0	1	0	0	0	1	0	3	6	0	0	1	2	1	0	0	0	5	105	20.1	95	2.4	29	63.75	0	0
1619	727	0	727	0	727	0	0	137	137.496	45	2	59	0	1	0	0	0	0	0	0	3	0	2	5	0	0	1	2	1	0	0	0	4.7	103	22.8	131	1.1	57.2	58.33	0	0
1620	713	0	713	0	713	0	0	140	140.176	38	1	61	0	1	0	0	0	1	0	0	3	0	1	3	0	0	1	1	1	0	0	0	4.4	107	25.1	111	1.2	72.1	64.36	0	0
1621	766	0	766	0	766	0	0	141	141.16	55	2	56	0	1	0	0	0	0	0	0	3	0	1	3	0	1	1	1	1	0	0	0	4.2	108	23.1	110	0.6	110.5	62.9	0	0
1622	765	0	765	0	765	0	0	139	138.696	37	1		1	1	0	0	0	0	0	0	2	0	3	0	0	0	1	2	1	0	0	0	5	110	20.1	81	2.7	28.4	61.34	0	0
1623	792	0	792	0	792	0	0	138	137.904	32	2	45	0	1	0	0	0	0	0	0	2	0	1	2	0	0	1	2	1	0	0	0	3.6	106	21.6	94	1.1	61.3	57.99	0	0
1624	744	0	744	0	744	0	0	141	141.064	47	1	65	1	1	0	0	0	0	0	0	2	0	1	1	0	0	1	2	1	0	0	0	3.8	106	23.1	104	1.2	69.1	57.89	0	0
1625	782	0	782	0	782	0	0	143	142.856	52	1		1	1	0	0	0	0	0	0	3	0	3	4	0	0	1	1	1	0	0	0	4.5	111	23.2	91	0.8	108.1	48.15	0	0
1626	702	0	702	0	702	0	0	136	136.384	58	1	76	0	1	0	0	0	0	0	0	3	0	3	4	0	0	1	2	1	0	0	0	4.1	106	16.8	124	1.9	39	64.81	0	0
1627	737	0	737	0	127	1	0	137	137.32	61	1		0	1	1	0	0	1	0	0	1	0	3	6	0	0	1	2	1	0	0	0	4.9	114	20.2	120	1.1	72.4	63.95	0	0
1628	1095	0	1095	0	1095	0	0	137	136.44	50	2	67	0	1	1	0	0	0	0	0	1	0	1	2	0	0	1	2	1	0	0	0	4.1	104	24	65	0.8	80.8	59.81	0	0
1629	1092	0	1092	0	1092	0	0	140	140.192	23	1	62	0	1	0	0	0	0	0	0	2	0	3	3	0	0	1	1	1	0	0	0	4.6	109	23.2	112	3	27.7	45.51		0
1630	395	0	395	0	395	0	0	142	141.968	33	2	45	0	1	0	0	0	0	0	0	4	0	1	3	0	0	1	1	1	0	0	0	4.4	104	25	98	0.7	102.6	54.62	0	0
1631	722	0	722	0	722	0	0	139	138.968	63	1	73	0	1	0	0	0	0	0	0	3	0	1	2	0	0	1	2	1	0	0	0	4	113	18.1	98	0.8	103.9	57.14	0	0
1632	699	0	699	0	699	0	0	141	140.776	54	1		0	1	0	0	0	0	0	0	3	0	3	0	0	0	1	2	1	0	0	0	4.4	108	24.4	86	1.4	56.2	65.54	0	0
1633	729	0	729	0	729	0	0	140	139.552	50	1	67	1	1	1	0	0	0	1	0	1	0	2	5	0	0	1	2	1	0	0	0	4.7	108	23.6	72	0.9	95.1	60.17	1	0
1634	708	0	708	0	708	0	0	140	139.904	41	2	46	0	1	0	0	0	0	0	0	4	0	1	1	0	0	1	2	1	0	0	0	3.5	103	27.7	94	1.5	40.7	60.4	0	0
1635	700	0	700	0	700	0	0	139	140.808	56	1	75	0	1	1	0	0	0	0	0	1	0	3	6	0	0	1	2	1	0	0	0	5.1	111	23.8	213	1.2	66.7	60.74	0	0
1636	690	0	690	0	690	0	0	141	140.76	40	2	42	0	1	0	0	0	0	0	0	2	0	3	3	0	0	1	2	1	0	0	0	3.9	111	21.6	85	0.7	98.7	56.73	0	0
1637	709	0	709	0	709	0	0	139	139.08	52	2	50	0	1	0	0	0	0	0	0	3	0	2	5	0	1	1	2	1	0	0	0	4.4	100	28.6	105	0.8	80.2	67.06	0	0
1638	689	0	689	0	124	1	0	141	141.016	49	1	72	1	1	0	0	0	1	0	0	2	0	2	5	0	0	1	2	1	0	0	0	4.2	105	22.8	101	1	113.9		0	0
1639	700	0	700	0	700	0	0	141	141.48	59	2	55	0	1	1	0	0	0	0	0	1	0	1	3	0	1	1	2	1	0	0	0	5.6	117	17.7	130	1.1	54.1	57.83	0	0
1640	694	0	694	0	694	0	0	136	135.872	35	1	63	1	0	0	0	0	0	0	0	3	0	3	0	0	0	1	1	1	0	0	0	4.6	102	21.1	92	1.1	81.1	63.76	0	1
1641	658	0	658	0	658	0	0	140	139.936	39	2	53	0	1	0	0	0	0	0	0	2	0	1	0	0	0	1	2	1	0	0	0	3.8	105	26.9	96	0.8	85	59.84	0	0
1642	645	0	645	0	645	0	0	139	139.272	48	1	69	0	1	0	0	0	0	0	0	2	0	1	0	0	0	1	2	1	0	0	0	4.1	105	24.6	117	1	84.9	56.04	0	0
1643	644	0	644	0	47	1	0	139	138.904	39	1	75	0	1	1	0	0	0	0	0	3	0	1	4	0	0	1	2	1	0	0	0	4.3	110	19.5	94	1.3	65.4	60.43	0	0
1644	641	0	641	0	641	0	0	140	140.224	42	2		0	0	0	0	0	1	0	0	3	0	3	3	0	0	1	2	1	0	0	0	4.1	106	23.7	114	0.8	83.7	57.14	0	0
1645	657	0	657	0	657	0	0	141	140.584	32	2	45	0	0	0	0	0	0	0	0	3	0	3	5	0	0	1	2	1	0	0	0	3.7	110	24.3	74	0.9	77.2	64.1	0	0
1646	670	0	670	0	484	1	0	136	139.296	36	1	57	1	1	1	0	0	1	1	0	1	0	1	2	0	0	1	2	1	0	1	0	3.7	104	27.1	306	0.7	135.8	64.52	1	0
1647	676	0	676	0	676	0	0	140	140.048	40	1	59	1	1	0	0	0	0	0	0	2	0	1	4	0	0	1	2	1	0	0	0	3.8	108	21.4	103	0.8	114	58.82	0	0
1648	669	0	669	0	669	0	0	139	138.664	24	2	37	0	1	0	0	0	0	0	0	2	0	1	2	0	0	1	1	1	0	0	0	3.8	105	23.9	79	1.1	65	55.65	0	0
1649	666	0	666	0	666	0	0	140	140.064	28	1	71	1	1	0	0	0	0	0	0	2	0	1	3	0	1	1	1	1	0	0	0	3.6	103	23.4	104	0.9	107	55.97	1	0
1650	680	0	680	0	680	0	0	141	141.304	31	1	69	0	1	0	0	0	0	0	0	4	0	1	2	0	0	1	1	1	0	0	0	3.4	104	25	119	1.4	62.9	55.96	0	0
1651	635	0	635	0	635	0	0	136	137.04	33	2	79	0	1	1	0	0	0	0	0	1	0	2	4	0	0	1	2	1	0	0	0	4.5	100	26.5	165	0.9	76.8	35.05	0	0
1652	667	0	667	0	114	1	0	139	138.952	25	1	78	0	1	0	0	0	0	0	0	2	0	1	3	0	1	1	1	1	0	0	0	4.6	108	18.3	97	1.2	78.5	29.53	1	0
1653	676	0	676	0	676	0	0	143	142.792	35	2	40	0	0	0	0	0	0	0	0	2	0	1	3	0	0	1	1	1	0	0	0	3.6	108	26	87	0.7	101.4	59.09	0	0
1654	675	0	675	0	163	1	0	138	137.744	52	1		0	0	0	0	0	0	0	0	4	0	3	3	0	0	1	2	1	0	0	0	3.4	111	23.9	84	1.3	61.7	63.41	0	0
1655	621	0	621	0	621	0	0	142	141.728	52	2	43	1	1	0	0	0	0	0	0	4	0	3	5	0	0	1	2	1	0	0	0	3.8	107	24	83	1.3	45.8	39.66	0	0
1656	1029	0	1029	0	1029	0	0	140	140.304	54	1	65	1	1	1	1	0	0	1	0	1	1	1	3	0	0	1	2	1	0	0	0	4.1	104	32.4	119			54.07	0	0
1657	599	0	599	0	599	0	0	140	140.032	50	1	81	0	0	0	1	0	0	0	0	3	0	1	2	0	0	1	2	1	0	0	0	4.4	104	25.7	102	0.9	95.1	66.25	0	0
1658	681	0	681	0	681	0	0	141	141.624	44	1	67	0	1	1	0	0	0	0	0	1	0	2	3	0	0	1	2	1	0	0	0	3.9	104	26.7	139	1.4	58.6	60.26	0	0
1659	939	0	939	0	939	0	0	141	141.112	58	2	47	0	1	1	0	0	0	0	0	4	0	1	3	0	0	1	2	1	0	0	0	5.3	105	25.4	107	0.7	91.5	65.79	0	0
1660	699	0	699	0	699	0	0	141	141.384	53	1	59	0	1	0	0	0	0	0	0	4	1	2	7	0	0	1	2	1	0	0	0	4.4	105	25.5	124			67.92	0	0
1661	670	0	670	0	670	0	0	137	136.92	34	2	43	0	1	0	0	0	0	0	0	2	0	1	0	0	0	1	2	1	0	0	0	3.6	107	19.8	95	0.9	76.3	63.16	0	0
1662	963	0	963	0	963	0	0	140	140.08	47	1	60	1	1	0	0	0	0	0	0	3	1	3	5	0	0	1	1	1	0	0	0	4.6	109	22	105			62.4	0	0
1663	646	0	646	0	646	0	0	143	143.64	54	2	60	0	1	1	0	0	0	0	0	1	0	3	5	0	0	1	1	1	0	0	0	3.5	106	25.1	140	1.1	55.1	63.04	0	0
1664	622	0	622	0	622	0	0	141	140.936	43	1	67	0	1	0	0	0	0	1	0	3	0	1	0	0	0	1	2	1	0	0	0	3.8	104	24.2	96	0.8	112.3	63.78	1	0
1665	622	0	622	0	622	0	0	138	138.064	59	2	58	0	1	0	0	0	0	0	0	2	0	2	4	0	0	1	2	1	0	0	0	4.5	107	18.8	104	1.6	35.1	63.51	0	0
1666	615	0	615	0	615	0	0	137	138.92	41	1	67	0	1	1	0	0	0	0	0	1	0	1	2	0	1	1	1	1	0	0	0	4.5	98	28	220	1.3	64.8	54.95	0	0
1667	636	0	636	0	636	0	0	138	137.856	47	1	59	1	1	0	0	0	0	0	0	2	0	2	5	0	0	1	2	1	0	0	0	4.6	101	25.6	91	1	85.3	55.25	0	0
1668	614	0	614	0	614	0	0	138	137.76	48	2	51	0	1	0	0	0	0	0	0	2	0	1	3	0	0	1	2	1	0	0	0	4.1	105	23.2	85	1.1	56.4	66.02	0	0
1669	610	0	610	0	610	0	0	144	144.064	59	1	64	1	1	0	0	0	0	0	0	3	0	2	5	0	0	1	1	1	0	0	0	4.2	104	26.1	104	1.6	47.3	66.23	0	0
1670	648	0	648	0	338	1	0	139	139.176	56	1	73	1	1	0	0	0	0	0	0	2	0	2	5	0	0	1	2	1	1	0	0	3.9	105	23.6	111	1	82.3	59.46	0	0
1671	651	0	651	0	651	0	0	141	141.432	65	1	57	1	1	0	0	0	0	0	0	3	0	3	4	0	0	1	2	1	0	0	0	4.9	104	26	127	1.1	71.5	64.29	0
1672	642	0	642	0	642	0	0	139	141.256	30	2	36	0	0	1	0	0	0	0	0	1	0	1	2	0	0	1	2	1	0	0	0	4.7	99	27.5	241	0.7	104.6	61.11	0	0
1673	641	0	641	0	#NULL!	1	0	139	138.52	33	2	51	0	1	0	0	0	0	0	0	4	0	3	6	0	0	1	2	1	0	0	0	3.5	112	17.9	70	2.3	26	61.79	0	1
1674	620	0	620	0	620	0	0	140	140.304	37	1	79	1	1	0	0	0	0	0	0	3	0	1	3	0	0	1	1	1	0	0	0	3.7	104	26	119	1.4	60.7	62.5	0	0
1675	646	0	646	0	646	0	0	137	136.968	39	1	62	0	1	0	0	0	0	0	0	4	0	2	6	0	0	1	1	1	1	0	0	4.2	105	23	98	1.6	51.5	67.16	0	0
1676	627	0	627	0	257	1	0	142	141.824	42	2	44	1	1	1	0	0	0	0	0	4	0	1	2	0	0	1	2	1	0	0	1	4.2	106	27.6	89	1.1	58	70.18	0	0
1677	602	0	602	0	602	0	0	141	142.68	51	1	59	1	0	0	0	0	1	0	0	1	0	2	6	0	0	1	1	1	0	0	0	4.9	101	27.9	205	6.1	10.4	57.64	0	0
1678	607	0	607	0	281	1	0	140	140.304	51	1	79	1	1	1	0	0	0	0	0	1	0	4	3	0	0	1	1	1	1	0	0	3.9	105	23.3	119	1.2	68	67.18	0	0
1679	634	0	634	0	634	0	0	140	139.808	31	2	65	0	1	1	0	0	0	0	0	4	0	4	7	0	0	1	2	1	1	0	0	3.5	108	22.4	88	1.5	43.1	65.43	0	0
1680	623	0	623	0	623	0	0	143	142.696	51	1	62	0	1	1	0	0	0	0	0	1	0	1	4	0	0	1	1	1	0	0	0	4.2	107	26.4	81	1.2	68	50	0	0
1681	619	0	619	0	493	1	1	134	134.896	53	1	84	1	1	1	0	0	0	0	0	1	0	2	4	0	1	1	2	1	1	0	0	4.3	107	25	156	1.6	48.4	44.62	0	0
1682	613	0	613	0	81	1	0	143	143	48	1	67	1	1	0	0	0	0	1	0	3	0	2	4	0	0	1	2	1	0	0	0	3.9	109	23.6	100	1.1	76.1	63.97	0	0
1683	586	0	586	0	586	0	0	141	141.032	47	1	60	1	1	0	0	0	0	0	0	3	0	2	4	0	0	1	2	1	0	0	0	3.8	102	26.8	102	1.4	57.8	63.64	0	0
1684	604	0	604	0	111	1	0	141	141.016	37	1	83	0	1	0	0	0	0	0	0	4	0	2	6	0	0	1	2	1	0	0	0	3.9	104	22.6	101	1.9	42.7	53.38	0	0
1685	619	0	619	0	619	0	0	144	144.128	41	1	75	1	0	0	0	0	0	0	0	3	0	2	6	0	1	1	1	1	0	0	0	4.3	104	25.2	108	1.2	71	55.93	0	0
1686	942	0	942	0	942	0	0	141	140.936	37	1	69	0	1	0	0	0	0	1	0	4	0	2	5	0	1	1	2	1	0	0	0	4.5	110	22.5	96	1.2	72.5	61.02	0	0
1687	604	0	604	0	604	0	0	136	135.792	40	2	43	0	1	0	0	0	0	0	0	2	0	2	5	0	0	1	2	1	0	0	0	3.7	105	25.3	87	1.6	38	53.85	0	0
1688	607	0	607	0	607	0	0	140	139.664	66	2	58	0	1	0	0	0	0	0	0	2	0	2	4	0	0	1	1	1	1	0	0	5.5	113	19.7	79	0.7	92.2	52.05	0	0
1689	604	0	604	0	604	0	0	139	138.792	29	2	45	1	1	0	0	0	0	0	0	4	0	1	3	0	0	1	2	1	0	0	0	3.3	103	26.4	87	0.8	90.3	61.11	0	0
1690	577	0	577	0	577	0	0	140	140.144	29	1	58	0	1	0	0	0	0	0	0	4	0	1	3	0	0	1	2	1	0	0	0	3.9	103	21.9	109	1.2	78.5	45.45	0	0
1691	559	0	559	0	559	0	0	141	141	48	1	73	1	1	0	0	0	0	1	0	4	0	1	1	0	1	1	1	1	0	0	0	4.7	101	28.9	100	0.8	109.8	66.38	0	0
1692	599	0	599	0	599	0	0	141	141.032	30	1	55	1	1	0	0	0	0	0	0	4	0	4	3	0	0	1	2	1	0	0	0	3.8	103	27.1	102	1.1	81.1	67.05	0	0
1693	601	0	601	0	601	0	0	142	141.776	32	2	51	0	1	0	0	0	0	0	0	4	0	1	3	0	0	1	2	1	0	0	0	5.2	107	25.2	86	1.2	55.4	62.86	0	0
1694	601	0	601	0	601	0	0	141	140.856	49	2	43	0	1	0	0	0	0	0	0	4	0	2	3	0	0	1	1	1	0	0	0	4.3	106	25.1	91	0.5	130.5	66.32	0	0
1695	580	0	580	0	580	0	0	136	136.016	45	2	51	0	1	0	0	0	0	0	0	2	0	2	3	0	1	1	2	1	0	0	0	4.3	101	25.6	101	0.6	108.8	64.75	0	0
1696	613	0	613	0	613	0	0	144	144.144	53	2	48	0	1	0	0	0	0	0	0	3	0	3	1	0	0	1	2	1	0	0	0	3.9	112	20.2	109	2.3	23.5	62.16	0	0
1697	609	0	609	0	609	0	0	140	140.736	43	1	86	0	1	0	0	0	0	0	0	3	0	2	3	0	0	1	2	1	0	0	0	4.1	102	23.8	146	1.8	43	62.88	0
1698	587	0	587	0	587	0	0	142	142.048	20	1	69	0	1	0	0	0	0	0	0	3	0	1	3	0	1	1	2	1	0	0	0	4	104	26.7	103	1.1	89	68.5	0	0
1699	583	0	583	0	468	1	0	135	136.664	50	2	60	0	1	1	0	0	0	0	0	1	0	2	6	0	0	1	1	1	0	0	0	4.4	112	16.4	204	1.3	44.6	62.99	0	0
1700	338	0	338	0	338	0	0	139	138.76	43	1	74	1	1	0	0	0	0	1	0	4	0	1	2	0	0	1	1	1	0	0	0	4.3	105	26	85	0.6	159.6	64.17	0	0
1701	572	0	572	0	572	0	0	143	142.6	49	2	54	0	1	1	0	0	0	0	0	1	0	1	3	0	1	1	2	1	0	0	0	3.9	109	24.3	75	1.1	56.8	63.79	0	0
1702	602	0	602	0	602	0	0	141	141.832	55	1	67	0	1	0	0	0	0	0	0	2	0	3	0	0	0	1	2	1	0	0	0	4.4	105	25.9	152	0.7	116.9	61.68	0	0
1703	566	0	566	0	566	0	0	141	141.08	20	1	85	0	1	0	0	0	0	0	0	4	0	1	3	0	1	1	2	1	0	0	0	4.3	108	24	105	1.4	68.8	66.01	0	0
1704	579	0	579	0	579	0	0	138	137.84	35	2	45	0	0	0	0	0	0	0	1	3	0	1	1	0	0	1	2	1	0	0	0	3.9	103	28.3	90	0.8	84.5	61.76	0	0
1705	549	0	549	0	75	1	1	131	131.016	48	1	56	0	1	0	0	0	0	1	0	3	0	1	2	0	0	1	2	1	0	0	0	4.5	100	22.6	101	1.4	59.5	34.65	0	0
1706	587	0	587	0	587	0	0	141	141.064	51	2	66	0	1	0	0	0	0	0	0	4	0	1	2	0	0	1	1	1	0	0	0	4.2	105	26.1	104	0.9	72.1	66.67	0	0
1707	559	0	559	0	559	0	0	142	142.24	59	2	70	0	1	0	0	0	0	0	0	4	0	2	5	0	1	1	2	1	0	0	0	4.5	105	25.8	115	0.9	70.9	62.96	0	0
1708	581	0	581	0	581	0	0	142	141.408	46	1	70	1	1	1	0	0	0	0	0	1	0	2	2	0	0	1	1	1	0	0	0	4.8	105	26.1	63	1.2	68.7	69.06	0	0
1709	570	0	570	0	570	0	0	141	140.664	66	2	62	0	1	1	1	0	1	0	0	2	0	2	5	0	0	1	2	1	0	0	0	4.2	102	27.7	79	0.9	67.6	65.38	0	0
1710	542	0	542	0	542	0	0	141	140.84	38	1	65	1	1	1	0	1	0	0	0	2	0	1	3	0	0	1	2	1	0	0	0	4.4	101	28.9	90	1	91.1	60.23	0	0
1711	555	0	555	0	555	0	0	139	140.328	63	1	76	0	1	0	1	0	0	1	0	1	0	2	5	0	0	1	1	1	0	0	0	4.9	102	27.5	183	2	37.2	66.67	1	1
1712	537	0	537	0	537	0	0	142	141.904	52	2	53	0	1	0	0	0	0	0	0	4	0	2	7	0	0	1	2	1	0	0	0	4.2	101	29.8	94	0.7	90.6	68.32	0	0
1713	560	0	560	0	560	0	0	140	140.112	58	1	57	1	1	0	0	0	0	0	0	3	0	1	3	0	0	1	1	1	0	0	0	4.9	102	27.7	107	0.9	98.6	68	0	0
1714	506	0	506	0	506	0	0	142	143.584	50	1	80	1	1	1	0	0	0	0	0	4	0	1	3	0	0	1	2	1	0	0	0	4.5	106	23.9	199	1.2	70.9	61.6	0	0
1715	519	0	519	0	519	0	0	142	141.808	67	1	59	0	1	1	1	0	0	0	0	1	0	2	3	0	0	1	2	1	0	0	0	4.1	104	27.7	88	1.2	66.2	61.33	0	0
1716	553	0	553	0	349	1	0	139	139.672	73	1	68	1	1	0	0	0	0	0	0	1	0	2	4	0	0	1	1	1	0	1	0	4.5	108	22.2	142	0.9	88.1	62.07	0	0
1717	565	0	565	0	565	0	0	138	137.904	36	1	51	1	1	1	1	0	0	0	0	2	0	1	3	0	0	1	2	1	0	0	0	4	107	20.4	94	0.4	292.6	71.32	0	0
1718	518	0	518	0	518	0	0	139	139.112	48	1	67	1	1	1	0	0	0	0	0	1	0	2	6	0	0	1	1	1	0	0	0	4.6	102	26.1	107	1.2	68.8	57.14	0	0
1719	550	0	550	0	550	0	1	126	125.456	64	1	62	1	1	1	1	0	0	0	0	1	0	1	2	0	0	1	2	1	0	0	0	6.1	93	20.8	66	0.9	96.6	59.63	0	0
1720	556	0	556	0	556	0	0	140	139.68	30	2		0	1	1	0	0	0	0	0	1	0	2	5	0	0	1	2	1	0	0	0	4.2	111	24.9	80	1.3	49.9	54.17	0	0
1721	506	0	506	0	506	0	0	141	140.776	31	1	71	0	1	0	0	0	0	0	0	3	0	1	2	0	0	1	2	1	0	0	0	4	103	25.1	86	1.6	53.9	52.63	1
1722	548	0	548	0	548	0	0	141	140.84	35	1	53	1	1	0	0	0	0	0	0	3	0	1	5	0	0	1	2	1	0	0	0	3.3	102	26.4	90	1	93.8	62.83	0	0
1723	509	0	509	0	509	0	0	143	142.968	51	1	65	1	1	1	1	0	0	0	0	1	0	2	3	0	0	1	1	1	0	0	0	4.6	106	26.9	98	1.5	51.3	59.42	0	0
1724	543	0	543	0	543	0	0	142	142.544	60	1	62	1	1	0	0	0	1	0	0	3	0	3	0	0	0	1	2	1	0	0	0	5.3	110	24.3	134	5.3	11.9	65.12	0	0
1725	903	0	903	0	903	0	0	140	140.56	58	1	80	0	1	1	0	0	1	0	0	1	0	1	3	0	1	1	1	1	0	0	0	4.3	102	25.5	135	0.7	125.4	62.24	0	0
1726	502	0	502	0	502	0	0	143	142.888	30	2	47	0	1	1	0	0	0	0	0	4	0	1	2	0	1	1	1	1	0	0	0	4.1	106	25.2	93	1.1	63.4	62.22	0	0
1727	528	0	528	0	528	0	0	142	142.032	44	2	53	0	0	0	0	0	0	0	0	4	0	2	4	0	0	1	2	1	0	1	0	4.1	105	27.6	102	0.8	79.5	60.98	0	0
1728	539	0	539	0	539	0	0	137	137.176	64	2	64	0	0	0	0	0	0	0	0	3	0	1	2	0	0	1	2	1	0	0	0	4.2	103	23.2	111	0.6	99.5	60.49	1	0
1729	534	0	534	0	534	0	0	139	138.984	54	2	53	0	1	1	0	0	0	0	0	3	0	1	3	0	0	1	2	1	0	0	0	4.3	105	23.6	99	0.7	94.4	64.86	0	0
1730	513	0	513	0	152	1	0	141	140.792	50	2	50	0	1	0	0	0	0	0	0	3	0	1	4	0	0	1	2	1	0	0	0	4.1	114	22	87	0.6	117.1	57.14	0	0
1731	876	0	876	0	876	0	0	136	136.032	25	2	42	0	1	0	0	0	0	0	1	4	0	1	2	0	0	1	2	1	0	0	0	4	104	22.1	102	1	71.9	59.72	0	0
1732	528	0	528	0	528	0	0	136	136.192	58	1	61	1	0	0	0	0	0	1	0	3	0	1	3	0	1	1	2	1	0	0	0	4.9	102	25.2	112	0.9	95.9	69.17	1	0
1733	534	0	534	0	534	0	0	142	141.824	26	2	61	0	1	0	0	0	0	0	0	2	0	1	2	0	0	1	2	1	0	0	0	4	104	25.7	89	0.9	79.6	51.57	1	0
1734	518	0	518	0	518	0	0	138	137.808	27	2	45	0	1	0	0	0	0	0	0	3	0	1	6	0	0	1	2	1	0	0	0	4	108	21	88	0.7	103.4	57.35	0	0
1735	490	0	490	0	490	0	0	138	138.208	43	2	60	0	1	0	0	0	0	0	0	3	0	2	3	0	0	1	2	1	0	0	0	3.7	105	24.8	113	0.6	125.8	62.86	1	0
1736	522	0	522	0	522	0	0	137	136.792	43	2	58	0	1	0	0	0	0	0	0	4	0	1	6	0	0	1	2	1	0	0	0	3.9	103	23.5	87	0.9	69.2	61.7	0	0
1737	491	0	491	0	491	0	0	141	140.696	46	2	54	0	1	1	0	0	0	1	0	3	0	1	3	0	1	1	2	1	0	0	0	3.6	108	22.6	81	0.6	121.6	66.67	0	0
1738	528	0	528	0	528	0	0	137	136.984	60	1	60	0	1	0	1	0	0	0	0	2	0	3	2	0	0	0	1	1	0	0	0	4.9	105	23.5	99	1	81.1	63.04	1	0
1739	458	0	458	0	458	0	0	141	141.496	54	2	66	0	1	0	0	0	0	0	0	2	0	2	5	0	0	1	1	1	0	0	0	4.3	106	27.8	131	1.1	57.5	67.31	0	0
1740	506	0	506	0	506	0	0	140	140.544	39	1	63	0	1	0	0	0	0	0	0	4	0	1	3	0	0	1	2	1	0	0	0	3.8	103	26	134	1.5	55.5		0	0
1741	534	0	534	0	534	0	0	136	135.904	35	2	48	0	1	0	0	0	0	0	0	2	0	1	2	0	1	1	2	1	0	0	0	4.5	105	22.3	94	0.7	108.5	64.84	0	0
1742	501	0	501	0	17	1	0	140	140.608	60	2	59	0	1	0	0	0	0	0	0	1	0	1	3	0	0	0	1	1	1	1	1	4.3	112	16	138	0.9	68.9	61.29	0	0
1743	495	0	495	0	495	0	0	142	141.84	25	1	69	0	1	0	1	0	0	0	0	3	0	1	0	0	0	0	2	1	0	0	0	3.5	104	23.3	90	2.8	30.2	74.84	1	0
1744	526	0	526	0	526	0	0	140	140.256	37	1	85	1	1	0	0	0	0	0	0	4	0	1	3	0	0	1	2	1	0	0	0	4.5	107	21.7	116	1.6	52.8	62.36	0	0
1745	495	0	495	0	495	0	0	141	140.984	47	1	73	1	1	0	0	0	0	0	0	2	0	1	3	0	0	1	2	1	0	0	0	4.6	106	25.4	99	1.8	43.5		0	0
1746	512	0	512	0	46	1	0	141	141.16	32	2	56	0	1	0	0	0	0	0	0	2	0	1	3	0	0	1	2	1	0	0	0	4.5	105	25.4	110	1.2	58.2	59.5	0	0
1747	490	0	490	0	349	1	0	140	139.984	56	2	57	0	1	0	0	0	0	0	0	2	0	3	4	0	0	1	2	1	0	0	0	4.3	109	20.6	99	1.4	42.8	57.43	0	0
1748	506	0	506	0	506	0	0	139	139.24	43	2	63	0	1	0	0	0	0	0	0	2	0	1	0	0	0	1	2	1	0	0	0	4.4	105	25.4	115	0.9	70.9	38.64	0	0
1749	438	0	438	0	438	0	0	143	142.792	53	2	61	0	0	0	0	0	0	0	1	4	0	1	0	0	0	1	1	1	0	0	0	4.8	107	26.9	87	1	64	68.97	0	0
1750	496	0	496	0	496	0	0	140	140.224	37	2	51	0	1	0	0	0	0	0	0	2	0	2	2	0	0	1	2	1	0	0	0	4.2	103	26.7	114	0.8	83.5	60	0	0
1751	496	0	496	0	496	0	0	139	138.824	40	2	54	0	1	0	0	0	0	0	0	3	0	2	5	0	1	1	1	1	0	0	0	4.1	103	26.3	89	0.9	70.2	58.89	0	0
1752	522	0	522	0	522	0	0	141	140.872	37	1	91	1	1	0	0	0	0	0	0	2	0	1	3	0	1	1	2	1	0	0	0	4.8	104	27.3	92	1.6	51.7	59.43	0	0
1753	522	0	522	0	522	0	0	139	139.256	45	2	56	0	1	0	0	0	0	0	0	2	0	3	4	0	0	1	1	1	0	0	0	4.2	105	25	116	1.2	50.3	63.38	0	0
1754	479	0	479	0	479	0	0	141	141.08	64	1	45	0	1	0	1	0	1	0	0	3	0	3	3	0	0	1	2	1	0	0	0	5	108	23	105	1.4	54.8	63.08	1	0
1755	471	0	471	0	471	0	0	139	139.016	35	1	77	0	1	0	0	0	0	0	0	3	0	1	3	0	0	1	2	1	0	0	0	3.9	101	27.3	101	1.6	54.6	61.14	0	0
1756	507	0	507	0	507	0	0	142	141.856	31	2	38	0	1	0	0	0	0	0	0	2	0	1	4	0	0	1	2	1	0	0	0	4.2	104	26.2	91	0.5	153.2	60.44	0	0
1757	483	0	483	0	483	0	1	135	134.92	26	1	56	0	1	0	0	0	0	0	0	4	0	1	3	0	1	1	2	1	0	0	0	3.8	98	23.1	95	1.2	80.2	67.09	0	0
1758	498	0	498	0	498	0	0	139	139.016	41	1	72	1	1	0	0	0	0	0	0	3	0	2	5	0	1	1	2	1	0	0	0	4.6	100	28.6	101	1.3	63.1	66.19	0	0
1759	509	0	509	0	509	0	0	140	139.824	37	2	54	0	0	0	0	0	0	0	0	3	0	2	6	0	0	1	2	1	0	0	0	3.9	105	24.4	89	0.8	89.8	55.34	0	0
1760	471	0	471	0	471	0	0	142	142.144	46	1	57	1	1	0	0	0	0	0	0	3	0	1	3	0	0	1	2	1	0	0	0	4	105	24.4	109	1.1	81	52	0	0
1761	460	0	460	0	460	0	0	140	140.464	50	2	50	0	1	0	0	0	0	0	0	4	0	2	4	0	0	1	2	1	0	0	0	3.4	103	27.2	129	0.7	88.4	65.82	0	0
1762	505	0	505	0	505	0	0	137	137.672	52	2	53	0	1	0	0	0	0	0	0	1	0	2	5	0	1	1	1	1	0	0	0	4.3	100	24.6	142	1.3	47.9	63.83	0	1
1763	489	0	489	0	489	0	0	141	140.728	33	1	75	1	1	1	0	0	0	0	0	2	0	1	0	0	0	1	2	1	0	0	0	4.5	105	26.1	83	0.9	100.9	64.29	0	0
1764	479	0	479	0	479	0	0	139	139.736	55	1	71	0	1	0	0	0	0	0	0	2	0	1	2	0	0	1	1	1	0	0	0	4.1	101	25.1	146	1.1	74	59.18	0	0
1765	492	0	492	0	492	0	0	139	139.048	42	1	81	1	1	0	1	0	0	0	0	2	0	2	4	0	0	1	2	1	0	0	0	3.4	102	24.1	103	1.6	49.3	61.9	0	0
1766	469	0	469	0	469	0	0	141	141.32	54	1	60	1	1	0	0	0	0	0	0	4	0	1	3	0	1	1	2	1	0	0	0	4.1	104	25.6	120	0.9	94.8	53.08	1	0
1767	807	0	807	0	807	0	0	138	137.984	41	2	43	0	0	0	0	0	0	0	0	2	1	1	1	0	0	1	2	1	0	0	0	4.2	106	23	99			62.5	0	0
1768	497	0	497	0	497	0	0	140	140.128	37	1	52	0	1	0	0	0	0	0	0	2	0	2	1	0	0	1	2	1	0	0	0	3.5	100	27.4	108	1	92.7		0	0
1769	497	0	497	0	497	0	0	141	142.152	59	1	75	1	1	1	0	0	0	1	0	1	0	1	2	0	0	1	2	1	0	0	0	3.7	106	23.7	172	1.1	74.5	55.81	0	0
1770	465	0	465	0	465	0	0	139	139.912	49	1	75	1	1	1	1	0	0	0	0	1	0	1	0	0	0	1	1	1	0	0	0	4.7	107	23.5	157	1.2	66	62.03	0	0
1771	470	0	470	0	470	0	0	139	138.904	36	1	57	0	1	0	0	0	0	0	0	4	0	2	5	0	0	1	2	1	0	0	0	4	106	23.1	94	1.4	62.6	79.2	0	0
1772	471	0	471	0	471	0	0	139	139.624	35	1	96	1	1	1	0	0	0	0	0	1	0	1	1	0	1	1	2	1	0	0	0	4.6	107	20.3	139	1.1	85.6	69.44	0	0
1773	426	0	426	0	426	0	0	138	137.888	34	1	65	1	1	0	0	0	0	0	0	2	0	2	5	0	0	0	2	1	0	0	0	5.3	102	23.8	93	1.5	57.9	67.27	0	0
1774	447	0	447	0	447	0	0	138	137.76	25	2	48	0	1	0	0	0	0	0	1	2	0	1	3	0	1	1	2	1	0	0	0	3.5	103	24.7	85	0.8	97.2	60.19	0	0
1775	439	0	439	0	439	0	0	141	140.792	61	1	67	0	1	1	1	0	1	0	0	1	0	1	3	0	0	1	2	1	0	0	0	4.3	101	25	87	1	81.8	65	0	0
1776	461	0	462	0	461	0	0	139	138.92	51	1	73	0	1	0	0	0	0	0	0	2	0	3	0	0	0	1	1	1	0	0	0	5.2	104	27.1	95	1.1	73.6	60.17	0	0
1777	471	0	471	0	471	0	0	139	139.192	57	2	44	0	1	0	0	0	0	0	0	2	0	3	5	0	0	1	2	1	0	0	0	4.8	107	22.4	112	3.4	14.9		1	0
1778	440	0	440	0	440	0	0	140	140.272	55	1	81	1	1	1	1	0	0	0	0	1	0	2	6	0	0	1	2	1	0	0	0	4.5	108	22.6	117	1.2	65	59.15	0	0
1779	467	0	467	0	467	0	0	141	141.064	42	2	52	0	1	0	0	0	0	0	0	4	0	2	5	0	0	1	2	1	0	0	0	3.5	103	27	104	0.7	96.1	62.9	0	0
1780	777	0	777	0	777	0	0	138	139.056	25	1	97	0	1	0	0	0	1	0	0	3	0	1	3	0	0	1	2	1	0	0	0	3.6	98	26.7	166	1.4	66.3	55.26	0	0
1781	431	0	431	0	431	0	0	143	143.112	32	1	111	0	0	0	0	0	0	0	0	1	0	1	2	0	0	1	1	1	0	0	0	3.8	105	22.4	107	1.4	61	69.6	0	0
1782	463	0	463	0	463	0	0	139	138.792	40	1	75	1	1	1	0	0	0	0	0	2	0	1	2	0	0	1	1	1	0	0	0	4.7	102	24.5	87	1.5	55.2	64.75	0	0
1783	450	0	450	0	450	0	0	141	140.952	41	2	55	0	1	0	0	0	0	0	0	2	0	1	0	0	0	1	1	1	0	0	0	3.6	106	24.4	97	0.8	86.6	64.66	0	0
1784	426	0	426	0	426	0	0	141	140.824	63	1	58	1	1	1	1	0	0	0	0	1	0	1	3	0	1	1	1	1	0	0	0	4.9	104	27	89	2.9	23.1	65.25	0	0
1785	473	0	473	0	473	0	0	138	138.8	50	1		1	1	0	0	0	0	0	0	3	0	3	3	0	0	1	2	1	0	1	0	5.2	109	18.3	150	1.1	79.6	54.86	0	0
1786	771	0	771	0	771	0	0	142	141.648	37	1	72	0	1	1	0	0	0	0	0	1	0	3	3	0	0	1	2	1	0	0	0	5.5	112	20.4	78			66.28	0	0
